# Supplementary material for: Inherent and transferable stabilization energies of carbon- and heteroatom-centred radicals on the same relative scale and their applications
Source: Royal Society of Chemistry journal article supplement (doi:10.1039/c4cp00537f), 2014-01-01
Supplement: c4cp00537f1.pdf [file c4cp00537f1.pdf]

### *Supporting Information for*

## Inherent and Transferable Stabilization Energies of Carbon- and Heteroatom-centered Radicals on the Same Relative Scale and Their Applications

**Michelle L. Coote,<sup>a\*</sup> Ching Yeh Lin,<sup>a</sup> and Andreas A. Zavitsas<sup>b\*</sup>**

<sup>a</sup> *Research School of Chemistry, Australian National University, Canberra, ACT 0200, Australia. Email: mcoote@rsc.anu.edu.au*

<sup>b</sup> *Department of Chemistry and Biochemistry, Long Island University, University Plaza, Brooklyn, New York 11201, USA. Email: Andreas.Zavitsas@liu.edu*

### **Table of Contents**

|                                                                                                                                                                                                                                                                                                                                                                                                                                                              |     |
|--------------------------------------------------------------------------------------------------------------------------------------------------------------------------------------------------------------------------------------------------------------------------------------------------------------------------------------------------------------------------------------------------------------------------------------------------------------|-----|
| <b>Table S1</b> Experimental data corresponding to the R–H, R–CH <sub>3</sub> , R–Cl and R–R BDEs in kcal mol <sup>-1</sup> of Table 1.....                                                                                                                                                                                                                                                                                                                  | S2  |
| <b>Table S2</b> Comparisons with known D[R–R′]. D[R–R′] <sub>calc</sub> by equation (8) with RSE <sub>Et</sub> and χ from Table 1. D[R–R′] <sub>lit</sub> literature values of bond energies, with reported uncertainties when significant, values reported in reference 9, and values obtained by D[R–R′] = D[CH <sub>3</sub> –CH <sub>3</sub> ] – RSE <sub>H</sub> [R·] – RSE <sub>H</sub> [R′·]. Gas phase values in kcal mol <sup>-1</sup> at 298 K..... | S5  |
| <b>Table S3</b> Total Energies at Various Levels of Theory, Thermal Correction, Zero Point Vibrational Energies, High Level Corrections, Entropies and Enthalpies (units are Hartrees unless otherwise noted). .....                                                                                                                                                                                                                                         | S12 |
| <b>Table S4</b> B3-LYP/6-31G(d) Optimized Geometries of All Species .....                                                                                                                                                                                                                                                                                                                                                                                    | S27 |

**Table S1** Experimental data corresponding to the R–H, R–CH<sub>3</sub>, R–Cl and R–R bond dissociation energies (BDE) in kcal mol<sup>-1</sup> in Table 1.<sup>1,2</sup>

| R                                                    | R-H BDE                                                                              | R-CH <sub>3</sub> BDE       | R-Cl BDE                                        | R-R BDE   |
|------------------------------------------------------|--------------------------------------------------------------------------------------|-----------------------------|-------------------------------------------------|-----------|
| C(O)OH                                               | 96.6                                                                                 | 92.0±2.0                    |                                                 | 80.0±1.5  |
| C(O)OCH <sub>3</sub>                                 | 92.7±1.0 <sup>34,5</sup><br><b>95.4±2.0</b><br>95.1<br>94.0<br>96.9<br>100.0<br>98.5 | 92.6±3.0                    |                                                 | 88.4±2.5  |
| C(O)OCH <sub>2</sub> CH <sub>3</sub>                 |                                                                                      |                             |                                                 |           |
| C(O)OC(CH <sub>3</sub> ) <sub>3</sub>                |                                                                                      |                             |                                                 |           |
| C≡N                                                  | 126.1±0.4                                                                            | 125.2±2.2                   | 100.8±1.2                                       | 137.7±1.6 |
| C(O)H                                                | 88.0±0.2                                                                             | 84.8±0.4                    |                                                 | 72.0      |
| C(O)Ph                                               | 88.7±2.6                                                                             | 85.0                        | 81.5±2.0                                        |           |
| C(O)CH <sub>3</sub>                                  | 89.4±0.3                                                                             | 84.1±0.5                    | 84.6±2.0                                        | 73.4±1.0  |
| C(O)N(CH <sub>3</sub> ) <sub>2</sub>                 |                                                                                      |                             |                                                 |           |
| C(O)N(CH <sub>2</sub> CH <sub>3</sub> ) <sub>2</sub> |                                                                                      |                             |                                                 |           |
| C(O)NH <sub>2</sub>                                  |                                                                                      | 88.5±1.5                    |                                                 |           |
| Ph                                                   | 112.9±0.5                                                                            | 102.0±1.0                   | 95.5±1.5<br>95.1±2.5                            | 114.4±1.5 |
| C≡CH                                                 | 134.9±1.2<br>132.9±0.7<br>133.1±0.2<br><b>133.0±0.7</b><br>133.3±0.1<br>131.3±0.7    | 121.3±3.2                   | 104.1±2.0                                       | 160.2±2.0 |
| CH=CH <sub>2</sub>                                   | 111.1±2.2<br>110.1±2.0<br>110.2±2.0<br><b>111.2±0.8</b><br>110.2±0.3                 | 101.9±1.5                   | 91.7±1.0<br><b>94.8±1.1</b><br>95.6±2.0<br>93.5 | 116.9±1.5 |
| C(O)NHCH <sub>3</sub>                                |                                                                                      |                             |                                                 |           |
| ( <i>E</i> )-CH=CHCH <sub>3</sub>                    | 109.0±2.4<br><b>111.1</b>                                                            | 102.6±2.0                   | 95.2                                            |           |
| CH=C(CH <sub>3</sub> ) <sub>2</sub>                  |                                                                                      |                             |                                                 |           |
| C(CH <sub>3</sub> ) <sub>3</sub>                     | <b>95.7±0.7</b>                                                                      | 86.9±0.7                    | 84.1±1.5                                        | 77.1±1.0  |
| CH <sub>2</sub> F                                    | 101.3±1.0                                                                            | 90.4±3.0<br><b>93.2±2.0</b> | 84.7±2.8                                        | 88.0±2.0  |
| CH <sub>2</sub> NO <sub>2</sub>                      | 99.3                                                                                 | 87.1                        |                                                 |           |
| CH <sub>2</sub> OC(O)H                               |                                                                                      |                             |                                                 |           |
| CH <sub>2</sub> OC(O)CH <sub>3</sub>                 | 96.7                                                                                 |                             |                                                 |           |
| CH <sub>2</sub> C≡N                                  | 96.0                                                                                 | 83.2±3.0                    | 63.9<br>66.4±0.7<br>70.5                        | 70.7±4.0  |
| CH(CH <sub>3</sub> ) <sub>2</sub>                    | 98.1±0.7                                                                             | 88.2±0.9                    | 84.6±1.5                                        | 84.5±1.1  |
| CH <sub>2</sub> OH                                   | 96.1±0.1                                                                             |                             |                                                 | 85.6±1.5  |

<sup>1</sup> Luo, Y.-R., Comprehensive Handbook of Chemical Bond Energies. CRC Press: Boca Raton, FL, 2007

<sup>2</sup> Experimental data taken from Luo<sup>1</sup> unless otherwise noted. Where available, the bolded value is Luo's "recommended" value.

<sup>3</sup> NIST Chemistry WebBook, NIST Standard Reference Database Number 69, <http://webbook.nist.gov/chemistry/> Accessed June 6 2013

<sup>4</sup> The experimental value may be wrong. The preferred value is 95.4±2.0. Δ<sub>f</sub>H<sup>0</sup>(H) is 52.1, Δ<sub>f</sub>H<sup>0</sup>(R-H) is -80.5, -83.4, -86.5 and -85.0 from NIST,<sup>3</sup> and Δ<sub>f</sub>H<sup>0</sup>(R) is -38.6 from Luo<sup>1</sup>, which gives BDE(R-H) 94.0, 96.9, 100.0 and 98.5. (G3(MP2)-RAD gives 100.1)

| R                                                    | R-H BDE                                                         | R-CH <sub>3</sub> BDE           | R-Cl BDE                                        | R-R BDE                                 |
|------------------------------------------------------|-----------------------------------------------------------------|---------------------------------|-------------------------------------------------|-----------------------------------------|
| CH <sub>2</sub> SH                                   | 93.9±2.0                                                        | 82.5±2.2                        |                                                 | 74.9±2.8                                |
| CH <sub>2</sub> Cl                                   | 100.1±0.5                                                       | 89.8±2.2                        | 79.3<br>80.9<br>77.9<br><b>80.8±0.8</b><br>78.5 | 87.2±3.3<br><b>86.2±2.0</b><br>87.1±1.3 |
| cyclo-C <sub>3</sub> H <sub>5</sub>                  | 106.3±0.2                                                       | 96.2                            |                                                 | 102.8                                   |
| CH <sub>3</sub>                                      | 105.0±0.1                                                       | 90.2±0.2                        | 83.7±0.4                                        | 90.2±0.2                                |
| CH <sub>2</sub> SCH <sub>3</sub>                     | 93.7±1.4                                                        | 82.0±2.0                        | 72.0±0.6                                        |                                         |
| CH <sub>2</sub> C≡CH                                 | 89.2±2.4<br>87.2±2.0<br>90.3±3.0<br><b>88.9±1.0</b><br>91.8±1.0 | 76.0±2.0<br>76.6±1.2            |                                                 |                                         |
| CH <sub>2</sub> CH=CH <sub>2</sub>                   | 88.1±0.7                                                        | 76.5±2.2<br><b>75.9±0.9</b>     | 71.3±1.2                                        | 61.5±1.0                                |
| CH <sub>2</sub> Br                                   | 101.6±1.0                                                       |                                 |                                                 |                                         |
| CH <sub>2</sub> CH <sub>3</sub>                      | <b>100.5±0.3</b>                                                | 88.5±0.5                        | 84.2±0.8                                        | 86.8±0.6                                |
| CH <sub>2</sub> C(O)OH                               | 95.3±2.9                                                        | 84.5±3.0                        | 66.6<br>74.3±0.5                                | 81.9±1.0                                |
| CH <sub>2</sub> SiH <sub>3</sub>                     |                                                                 |                                 |                                                 |                                         |
| CH <sub>2</sub> -cyclo-C <sub>3</sub> H <sub>5</sub> | 97.4±1.6                                                        |                                 |                                                 |                                         |
| CH <sub>2</sub> C(O)CH <sub>3</sub>                  | 95.9±0.7                                                        | 86.5±3.0                        |                                                 |                                         |
| CH <sub>2</sub> C(O)NH <sub>2</sub>                  |                                                                 |                                 | 80.7                                            |                                         |
| CH <sub>2</sub> Ph                                   | 88.5±1.5                                                        | 76.4±1.7                        | 72.9±2.0<br>71.6<br><b>71.7±1.0</b>             | 62.6±2.2                                |
| CH <sub>2</sub> S(O)CH <sub>3</sub>                  | 94.0                                                            |                                 |                                                 |                                         |
| CH <sub>2</sub> S(O <sub>2</sub> )CH <sub>3</sub>    | 99.0                                                            |                                 |                                                 |                                         |
| CH <sub>2</sub> NH <sub>2</sub>                      | 93.9±2.0                                                        | 82.2                            |                                                 | 68.4±3.0                                |
| CH <sub>2</sub> N(CH <sub>3</sub> ) <sub>2</sub>     | 93.2                                                            |                                 |                                                 |                                         |
| N(CH <sub>3</sub> ) <sub>2</sub>                     | 94.6±2.0                                                        | 75.6±2.5<br>79.3                |                                                 | 59.6                                    |
| NHCH <sub>3</sub>                                    | 101.6±2.0                                                       | <b>82.2±2.5</b><br>81.9         |                                                 | 66.0±3.0                                |
| NH <sub>2</sub>                                      | 108.2±0.3                                                       | 85.7±0.5                        | 60.5                                            | 67.4<br><b>66.2±0.3</b>                 |
| NO <sub>2</sub>                                      |                                                                 | 60.8<br>63.7<br><b>62.3±0.5</b> | 34.0                                            | 13.7±0.2                                |
| NHC(O)H                                              | 108.5                                                           |                                 |                                                 |                                         |
| NHC(O)CH <sub>3</sub>                                | 107.5                                                           |                                 |                                                 |                                         |
| OH                                                   | 119.30±0.05                                                     | 92.00±0.17                      | 55.8                                            | 46.8±1.4                                |
| OCH <sub>2</sub> CH <sub>3</sub>                     | 105.4±1.4                                                       | 83.6±1.0                        |                                                 | 39.7                                    |
| OCH <sub>3</sub>                                     | 105.2±0.7                                                       | 84.1±1.0                        | 48.0                                            | 40.0±1.5                                |
| OC(O)H                                               | 112.0±3.0                                                       | 91.7±3.0                        |                                                 |                                         |
| OC(O)CH <sub>3</sub>                                 | 112.0±3.0                                                       | 90.9±3.0                        |                                                 | 33.5±5.0                                |
| S(O <sub>2</sub> )CH <sub>3</sub>                    | ≤94.9 <sup>5</sup>                                              | 66.8                            | 70.0                                            |                                         |
| SH                                                   | 91.1±1.0<br>92.9±2.0<br>91.2±0.7<br><b>91.2±0.7</b><br>91.2±0.1 | 74.0±1.5<br><b>74.7±1.0</b>     |                                                 | 64.7±2.0                                |
| S(O)CH <sub>3</sub>                                  |                                                                 | 53.0±2.0<br>55.1±2.4            |                                                 |                                         |

<sup>5</sup> Not plotted in Figure 1.

| R                   | R-H BDE                                                                | R-CH <sub>3</sub> BDE | R-Cl BDE                     | R-R BDE                      |
|---------------------|------------------------------------------------------------------------|-----------------------|------------------------------|------------------------------|
| SCH <sub>3</sub>    | 88.3<br>86.4±2.2                                                       | 77.2±2.0<br>73.6±0.8  | 70.0±3.0                     | 64.0<br>62.9±2.6<br>65.2±0.9 |
| SCH <sub>2</sub> Ph | 86.9<br>87.8                                                           |                       |                              |                              |
| F                   | 136.157±0.003                                                          | 109.8<br>112.8        | 62.3<br>61.2                 | 37.923±0.023                 |
| Cl                  | 103.098±0.003                                                          |                       | 57.978±0.001<br>57.939±0.461 | 57.978±0.001<br>57.939±0.461 |
| Br                  | 87.51±0.05                                                             | 69.8                  | 52.42±0.01                   | 46.333±0.029                 |
| BH <sub>2</sub>     | 82.6 <sup>5,67</sup><br>74.6 <sup>5,66</sup><br>107.1±3.6 <sup>8</sup> |                       |                              |                              |
| SiH <sub>3</sub>    | 91.7±0.5                                                               | 90±1                  | 109±2                        | 77±1                         |
| PH <sub>2</sub>     | 83.9±0.5                                                               |                       |                              | 61.2                         |

<sup>6</sup> Chase, M.W., Jr., *NIST-JANAF Thermochemical Tables, Fourth Edition*, J. Phys. Chem. Ref. Data, Monograph

<sup>7</sup> Experimental value reported by Luo is wrong.  $\Delta_f H^0(\text{BH}_3)$  is 25.50 from Chase<sup>6</sup>, and should be 21.0±2.4 from NIST<sup>6</sup>, and  $\Delta_f H^0(\bullet\text{BH}_2)$  is 48.00 from Chase<sup>6</sup>, and should be 76.1±2.6 from NIST<sup>3</sup>. Using the corrected heats of formation gives BDE(R-H) 107.1±3.6 which is closer to the G3(MP2)-RAD value (104.7)

<sup>8</sup> From the NIST website.<sup>3</sup>

**Table S2** Comparisons with known  $D[\text{R}-\text{R}']$ .  $D[\text{R}-\text{R}']_{\text{calc}}$  by equation (8) with  $\text{RSE}_{\text{Et}}$  and  $\chi$  from Table 1.  $D[\text{R}-\text{R}']_{\text{lit}}$  literature values of bond dissociation energies, with reported uncertainties when significant, values reported in reference 9, and values obtained by  $D[\text{R}-\text{R}'] = D[\text{CH}_3-\text{CH}_3] - \text{RSE}_{\text{H}}[\text{R}\cdot] - \text{RSE}_{\text{H}}[\text{R}'\cdot]$ . Gas phase values in  $\text{kcal mol}^{-1}$  at 298 K.

| $\text{R}\cdot$ <sup>10</sup> | $\cdot\text{R}'$                             | $D[\text{R}-\text{R}']_{\text{calc}}$ | $D[\text{R}-\text{R}']_{\text{lit}}$ <sup>11</sup>                                   | $D[\text{R}-\text{R}']$ <sup>12</sup> | $D[\text{R}-\text{R}']$ <sup>13</sup> |
|-------------------------------|----------------------------------------------|---------------------------------------|--------------------------------------------------------------------------------------|---------------------------------------|---------------------------------------|
| $\text{CH}_3\text{CH}_2$      | $\text{CH}_2\text{CH}=\text{CH}_2$           | 73.2                                  | $74.3\pm 1.5$ , <sup>1</sup> $74.3\pm 2$ <sup>14</sup>                               |                                       | 68.2                                  |
| $\text{CH}_3\text{CH}_2$      | $\text{CH}(\text{CH}_3)_2$                   | 87.0                                  | $86.1$ , <sup>15</sup> $87.1$ <sup>14</sup>                                          |                                       | 79.9                                  |
| $\text{CH}_3\text{CH}_2$      | $(\text{CH}_3)_3\text{C}$                    | 86.9                                  | $86.4$ , <sup>16</sup> $83.3$ , <sup>15</sup> $83.8$ <sup>14</sup>                   |                                       | 78.6                                  |
| $(\text{CH}_3)_2\text{CH}$    | $\text{CH}_2\text{CH}=\text{CH}_2$           | 72.9                                  | $73.7$ , <sup>15</sup> $74.7$ <sup>14</sup>                                          |                                       | 65.9                                  |
| $(\text{CH}_3)_3\text{C}$     | $\text{CH}_2\text{CH}=\text{CH}_2$           | 72.9                                  | $72.9\pm 1$ , <sup>15</sup> $72.4\pm 1$ <sup>14</sup>                                |                                       | 64.6                                  |
| $\text{CH}_2=\text{CHCH}_2$   | $\text{CH}=\text{CH}_2$                      | 85.5                                  | $87.3\pm 0.8$ , <sup>16</sup> $86.5$ <sup>14</sup>                                   |                                       | 77.8                                  |
| $\text{HC}\equiv\text{CCH}_2$ | $\text{CH}_3$                                | 78.1                                  | $79.6$ , <sup>15</sup> $76.3\pm 1$ <sup>14</sup>                                     |                                       | 76.0                                  |
| $\text{HC}\equiv\text{CCH}_2$ | $\text{CH}_2\text{CH}_3$                     | 77.9                                  | $77\pm 3$ , <sup>16</sup> $78.0$ , <sup>15</sup> $74.9\pm 1$ <sup>14</sup>           |                                       | 72.8                                  |
| $\text{N}\equiv\text{CCH}_2$  | $\text{CH}_3$                                | 83.0                                  | $84.3$ , <sup>17</sup> $83.2\pm 3$ <sup>15</sup>                                     | 80.1                                  | 80.9                                  |
| $\text{N}\equiv\text{CCH}_2$  | $\text{CH}_2\text{CH}_3$                     | 83.1                                  | $83.6$ , <sup>17</sup> $82.4\pm 1.3$ <sup>15</sup>                                   |                                       | 77.7                                  |
| $\text{N}\equiv\text{CCH}_2$  | $\text{CH}=\text{CH}_2$                      | 94.7                                  | $94.8$ , <sup>17</sup> $94.2\pm 1$ <sup>15</sup>                                     |                                       | 87.3                                  |
| $\text{PhCH}_2$               | $\text{CH}_3$                                | 76.9                                  | $77.6$ , <sup>18</sup> $77.2\pm 1$ <sup>14</sup>                                     | 75.0                                  | 74.0                                  |
| $\text{PhCH}_2$               | $\text{CH}_2\text{CH}_3$                     | 76.3                                  | $76.7$ , <sup>16</sup> $76.0$ <sup>14</sup>                                          |                                       | 70.8                                  |
| $\text{PhCH}_2$               | $\text{CH}(\text{CH}_3)_2$                   | 76.1                                  | $76.4$ , <sup>16</sup> $75.8$ <sup>15</sup>                                          |                                       | 68.5                                  |
| $\text{PhCH}_2$               | Ph                                           | 91.3                                  | $97.0$ , <sup>16</sup> $91.7\pm 2$ , <sup>15</sup> $91.1\pm 2.2$ <sup>14</sup>       |                                       | 82.9                                  |
| Ph                            | $\text{CH}_3$                                | 103.0                                 | $102.9\pm 1$ , <sup>15</sup> $103.8\pm 2$ <sup>14</sup>                              | 101.1                                 | 97.5                                  |
| Ph                            | $\text{CH}_2\text{CH}_3$                     | 102.4                                 | $100.2$ , <sup>15</sup> $102.3\pm 2$ <sup>14</sup>                                   |                                       | 94.3                                  |
| Ph                            | $\text{CH}=\text{CH}_2$                      | 114.7                                 | $115.3\pm 1$ , <sup>15</sup> $116.9\pm 2.2$ <sup>14</sup>                            |                                       | 103.9                                 |
| Ph                            | cyclo- $\text{C}_3\text{H}_5$                | 112.6                                 | $112.4\pm 1.5$ , <sup>15</sup> $111.9\pm 3.2$ <sup>14</sup>                          |                                       | 102.3                                 |
| Ph                            | $\text{CH}(\text{CH}_3)_2$                   | 102.2                                 | $100.7\pm 1.5$ , <sup>1</sup> $99.0\pm 1$ , <sup>15</sup> $102.1\pm 2$ <sup>14</sup> |                                       | 92.0                                  |
| Ph                            | $\text{CH}_2\text{OH}$                       | 101.0                                 | $98.3\pm 1$ , <sup>15</sup> $101.6\pm 2.2$ <sup>14</sup>                             | 95.1                                  | 89.8                                  |
| Ph                            | $\text{CH}_2\text{NH}_2$                     | 96.5                                  | $94.2\pm 2.2$ , <sup>15</sup> $95.6\pm 2.8$ <sup>19</sup>                            |                                       | 86.8                                  |
| Ph                            | $\text{CH}_2\text{NO}_2$                     | 105.2                                 | $108.0\pm 1$ <sup>20</sup>                                                           |                                       | 94.6                                  |
| Ph                            | $\text{CH}_2\text{Cl}$                       | 103.1                                 | $102.7\pm 2.1$ <sup>15</sup>                                                         |                                       | 92.7                                  |
| Ph                            | $\text{CH}_2\text{SH}$                       | 97.7                                  | $92.9\pm 2.2$ <sup>25</sup>                                                          |                                       | 88.9                                  |
| $\text{Ph}^{21}$              | $\text{CH}_2\text{S}(\text{O}_2)\text{CH}_3$ | 107.7                                 | $104.6\pm 3.2$ <sup>15</sup>                                                         |                                       | 98.1                                  |

<sup>9</sup> De Vleeschouwer, F.; Van Speybroeck, V.; Waroquier, M.; Greelings, P.; De Proft, F. *J. Org. Chem.* **2008**, *73*, 9109–9120.

<sup>10</sup> Standard enthalpies of formation,  $\Delta_f H^\circ[\text{RR}']$ , are from reference 14, unless indicated otherwise.

<sup>11</sup> Value either reported in the reference indicated or obtained by  $D[\text{R}-\text{R}'] = \Delta_f H^\circ[\text{R}] + \Delta_f H^\circ[\text{R}'] - \Delta_f H^\circ[\text{RR}']$  with values of  $\Delta_f H^\circ[\text{R}]$  and  $\Delta_f H^\circ[\text{R}']$  from the reference indicated.

<sup>12</sup> Reported in reference 9.

<sup>13</sup> Calculated using  $\text{RSE}_{\text{H}}[\text{R}\cdot]$  values applicable to C–C bonds only (see text).

<sup>14</sup> Afeefy, H. Y.; Liebman, J. F.; Stein, S. E. Neutral Thermochemical Data. In *NIST Chemistry Webbook*, NIST Standard Reference Database Number 69; Linstrom P. J., Mallard W. G. Eds.; National Institute of Standards and Technology, Gaithersburg, MD 20899 at <http://webbook.nist.gov>.

<sup>15</sup> *Handbook of Chemistry and Physics*, 90th ed.; Lide D. R., Ed., CRC Press; Boca Raton, FL, 2009–2010.

<sup>16</sup> Blanksby, S. J.; Ellison, G. B. *Acc. Chem. Res.* **2003**, *36*, 255–263.

<sup>17</sup> Goos, E.; Burcat, A.; Ruscic, B. *Ideal Gas Thermochemical Database with updates from Active Thermochemical Tables*, available at <http://garfield.chem.elte.hu/Burcat/BURCAT.THR> or at <ftp://ftp.technion.ac.il/pub/supported/aetdd/thermodynamics/>

<sup>18</sup> Experimental value cited in reference 9.

<sup>19</sup> Lias, S. G.; Liebman, J. F.; Levin, R. D.; Kafafi, S. A. NIST Standard Reference Database 25; Stein, S. E., Ed.; 1994. Chemical Kinetics and Thermodynamics Division, National Institute of Standards and Technology, Gaithersburg, MD 20899. Version 2.0.

<sup>20</sup> Using  $\Delta_f H^\circ[\text{CH}_2\text{NO}_2] = 36.4 \text{ kcal mol}^{-1}$  and  $\Delta_f H^\circ[\text{cyclo-C}_3\text{H}_5\text{NO}_2] = 4.2$  from the compilation of Burcat, A. *J. Phys. Chem. Ref. Data* **1999**, *28*, 63–130.

| R· <sup>10</sup>                | ·R'                                 | D[R-R'] <sub>calc</sub> | D[R-R'] <sub>lit</sub> <sup>11</sup>                                | D[R-R'] <sup>12</sup> | D[R-R'] <sup>13</sup> |
|---------------------------------|-------------------------------------|-------------------------|---------------------------------------------------------------------|-----------------------|-----------------------|
| CH <sub>2</sub> =CH             | CH <sub>3</sub>                     | 100.3                   | 101.6, <sup>15</sup> 101.0 <sup>14</sup>                            | 98.7                  | 95.0                  |
| CH <sub>2</sub> =CH             | CH <sub>2</sub> OH                  | 98.4                    | 97.0, <sup>15</sup> 98.6±1.4 <sup>14</sup>                          | 92.5                  | 87.3                  |
| CH <sub>2</sub> =CH             | CH <sub>2</sub> CH <sub>3</sub>     | 99.8                    | 100.1, <sup>1</sup> 99.6 <sup>14</sup>                              |                       | 91.8                  |
| CH <sub>2</sub> =CH             | cyclo-C <sub>3</sub> H <sub>5</sub> | 109.9                   | 111.0, <sup>22</sup> 108.4±2.5 <sup>15</sup>                        |                       | 99.8                  |
| CH <sub>2</sub> =CH             | CH(CH <sub>3</sub> ) <sub>2</sub>   | 99.6                    | 98.6, <sup>15</sup> 99.1±1.1 <sup>14</sup>                          |                       | 89.5                  |
| CH <sub>2</sub> =CH             | C(CH <sub>3</sub> ) <sub>3</sub>    | 99.6                    | 98.1, <sup>15</sup> 97.1±1.2 <sup>14</sup>                          |                       | 88.2                  |
| HC≡C                            | CH <sub>3</sub>                     | 124.6                   | 126.4±1, <sup>15</sup> 123.5±2 <sup>14</sup>                        |                       | 116.7                 |
| HC≡C                            | CH <sub>2</sub> CH <sub>3</sub>     | 125.1                   | 125.1±0.5, <sup>16</sup> 124.5, <sup>15</sup> 121.9±2 <sup>14</sup> |                       | 113.5                 |
| HC≡C                            | cyclo-C <sub>3</sub> H <sub>5</sub> | 134.0                   | 135.8, <sup>22</sup> 132.7±2.5 <sup>15</sup>                        |                       | 121.5                 |
| HC≡C                            | CH(CH <sub>3</sub> ) <sub>2</sub>   | 125.6                   | 124.5, <sup>16</sup> 124.0, <sup>15</sup> 122.4±2.2 <sup>14</sup>   |                       | 111.2                 |
| HC≡C                            | C(CH <sub>3</sub> ) <sub>3</sub>    | 125.9                   | 124.1, <sup>23</sup> 121.7, <sup>15</sup> 118.6±2 <sup>14</sup>     |                       | 109.9                 |
| HC≡C                            | CH=CH <sub>2</sub>                  | 136.3                   | 137.6, <sup>15</sup> 133.6±2.4 <sup>14</sup>                        |                       | 123.1                 |
| HC≡C                            | CH=CHCH <sub>3</sub>                | 137.3                   | 137.9, <sup>22</sup> 137.2 <sup>17</sup>                            |                       | 124.4                 |
| HC≡C                            | Ph                                  | 139.3                   | 141.2, <sup>15</sup> 140.7±2.8 <sup>14</sup>                        |                       | 125.6                 |
| HC≡C <sup>24a</sup>             | C≡N                                 | 151.6                   | 151.5, <sup>15</sup> 148.1±2 <sup>14</sup>                          |                       | 139.2                 |
| HC≡C <sup>24b</sup>             | CH <sub>2</sub> Cl                  | 122.9                   | 120.7±2 <sup>15</sup>                                               |                       | 111.9                 |
| HC≡C <sup>24b</sup>             | CH <sub>2</sub> Br                  | 123.4                   | 120.3±2 <sup>25</sup>                                               |                       | 113.1                 |
| HC≡C <sup>24b</sup>             | CH <sub>2</sub> C≡N                 | 116.2                   | 114.0, <sup>17</sup> 112.8±1 <sup>15</sup>                          |                       | 109.0                 |
| N≡C                             | CH <sub>3</sub>                     | 121.9                   | 124.7±2.2, <sup>15</sup> 121.1 <sup>14</sup>                        | 123.1                 | 111.1                 |
| N≡C                             | CH <sub>2</sub> CH <sub>3</sub>     | 122.9                   | 121.6, <sup>16</sup> 121.1±1.8, <sup>15</sup> 120.1 <sup>14</sup>   |                       | 107.9                 |
| N≡C                             | cyclo-C <sub>3</sub> H <sub>5</sub> | 131.3                   | 130.9, <sup>26</sup> 131.2, <sup>22</sup> 128.2±2.8 <sup>15</sup>   |                       | 115.9                 |
| N≡C                             | CH(CH <sub>3</sub> ) <sub>2</sub>   | 123.7                   | 120.9, <sup>16</sup> 120.6±1, <sup>15</sup> 120.6 <sup>14</sup>     |                       | 105.6                 |
| N≡C                             | CH <sub>2</sub> CH=CH <sub>2</sub>  | 107.7                   | 108.7, <sup>16</sup> 108.2, <sup>15</sup> 107.2 <sup>14</sup>       |                       | 93.9                  |
| N≡C                             | C(CH <sub>3</sub> ) <sub>3</sub>    | 124.2                   | 117.8, <sup>16</sup> 117.3, <sup>15</sup> 115.8 <sup>14</sup>       |                       | 104.3                 |
| N≡C                             | CH=CH <sub>2</sub>                  | 133.7                   | 133±1, <sup>16</sup> 134.8, <sup>15</sup> 133.8±1 <sup>14</sup>     |                       | 117.5                 |
| HOCH <sub>2</sub> <sup>19</sup> | CH <sub>2</sub> NH <sub>2</sub>     | 79.8                    | 80.2±2.5 <sup>15</sup>                                              |                       | 70.2                  |
| HOCH <sub>2</sub> <sup>19</sup> | CH <sub>2</sub> F                   | 90.2                    | 88.3±2 <sup>25</sup>                                                |                       | 77.9                  |
| HOCH <sub>2</sub> <sup>19</sup> | CH <sub>2</sub> Cl                  | 87.1                    | 86.2±2 <sup>15</sup>                                                |                       | 76.1                  |
| HOCH <sub>2</sub> <sup>19</sup> | CH <sub>2</sub> SH                  | 81.6                    | 79.2±2.2 <sup>25</sup>                                              |                       | 72.3                  |
| FCH <sub>2</sub> <sup>19</sup>  | CH <sub>2</sub> NH <sub>2</sub>     | 86.0                    | 83.0±1.9 <sup>25</sup>                                              |                       | 74.9                  |
| HC(O)                           | CH <sub>3</sub>                     | 83.8                    | 86.1, <sup>15</sup> 86.0 <sup>14</sup>                              | 84.1                  | 73.2                  |
| HC(O)                           | CH <sub>2</sub> CH <sub>3</sub>     | 82.8                    | 83.3, <sup>16</sup> 82.9 <sup>14</sup>                              |                       | 70.0                  |
| HC(O)                           | CH(CH <sub>3</sub> ) <sub>2</sub>   | 82.2                    | 83.3, <sup>16</sup> 84.0 <sup>14</sup>                              |                       | 67.7                  |
| HC(O) <sup>27</sup>             | CH=CH <sub>2</sub>                  | 95.5                    | 97.7±1, <sup>15</sup> 97.4±1.4 <sup>14</sup>                        |                       | 79.6                  |
| HC(O)                           | CH=CHCH <sub>3</sub>                | 96.3                    | 100.5, <sup>22</sup> 99.1 <sup>17</sup>                             |                       | 80.9                  |
| HC(O) <sup>19</sup>             | CH <sub>2</sub> C≡CH                | 74.0                    | 74.3, <sup>15</sup> 71.4±1 <sup>14</sup>                            |                       | 60.6                  |
| HC(O)                           | Ph                                  | 98.0                    | 99.3, <sup>16</sup> 97.9±1, <sup>15</sup> 100.2±2 <sup>14</sup>     |                       | 82.1                  |
| HOC(O)                          | CH <sub>3</sub>                     | 95.2                    | 92.0, <sup>28</sup> 94.8±1, <sup>22</sup> 95.2±1 <sup>17</sup>      |                       | 85.2                  |

<sup>21</sup> Mackle, H.; O'Hare, P.A.G. *Trans. Faraday Soc.* **1961**, *57*, 1521–1526.  $\Delta_f H^\circ[\text{PhCH}_2\text{S}(\text{O}_2)\text{CH}_3] = -68.0 \pm 1.0 \text{ kcal mol}^{-1}$ .

<sup>22</sup> Goldsmith, C. F.; Magoon, G. R.; Green, W. H. *J. Phys. Chem. A* **2012**, *116*, 9033–9057.

<sup>23</sup> From CBS-QB3 calculations of Sabbe, M. K.; Saeys, M.; Reyniers, M.-F.; Marin, G. B.; Van Speybroeck, V.; Waroquier, M. *J. Phys. Chem. A* **2005**, *109*, 7466–7480.  $\Delta_f H^\circ[\text{HC}\equiv\text{CC}(\text{CH}_3)_3] = 23.0 \text{ kcal mol}^{-1}$ ;  $\Delta_f H^\circ[(E)\text{-CH}_3\text{CH}=\text{CH}] = 65.3$ ;  $\Delta_f H^\circ[(\text{CH}_3)_2\text{C}=\text{CH}] = 57.9$ .

<sup>24</sup> (a) Rayne, S.; Forest, K. *Comput. Theor. Chem.* **2011**, *974*, 163–179. G4 theoretical calculations. (b) Rayne, S.; Forest, K. *Comput. Theor. Chem.* **2011**, *970*, 15–22. G4 theoretical calculations.

<sup>25</sup> Sander, S. P.; Abbatt, J.; Barker, J. R.; Burkholder, J. B.; Friedl, R. R.; Golden, D. M.; Huie, R. E.; Kolb, C. E.; Kurylo, M. J.; Moortgat, G. K.; Orkin, V. L.; Wine, P. H. *Chemical Kinetics and Photochemical Data for Use in Atmospheric Studies, Evaluation No. 17*, JPL Publication 10-6, Jet Propulsion Laboratory, Pasadena, CA 2011. Standard enthalpies of formation available in Appendix A of the downloadable file at <http://jpldataeval.jpl.nasa.gov>.

<sup>26</sup> Using  $\Delta_f H^\circ[\text{cyclo-C}_3\text{H}_5] = 69.5$  of Sirjean, B.; Glaude, P. A.; Ruiz-Lopez, M. F.; Fournet, R. *J. Phys. Chem. A* **2008**, *112*, 11598–11610.

<sup>27</sup> Using  $\Delta_f H^\circ[\text{CH}_2=\text{CHC}(\text{O})\text{H}] = -16.0 \text{ kcal mol}^{-1}$  from the G3SX calculations of Asatryan, R.; da Silva, G.; Bozzelli, J. W. *J. Phys. Chem. A* **2010**, *114*, 8302–8311. No experimental value found.

<sup>28</sup> Berkowitz, J.; Ellison, G. B.; Gutman, D. *J. Phys. Chem.* **1994**, *98*, 2744–2765.

| R· <sup>10</sup>                                  | ·R'                                 | D[R-R'] <sub>calc</sub> | D[R-R'] <sub>lit</sub> <sup>11</sup>                                             | D[R-R'] <sup>12</sup> | D[R-R'] <sup>13</sup> |
|---------------------------------------------------|-------------------------------------|-------------------------|----------------------------------------------------------------------------------|-----------------------|-----------------------|
| HOC(O)                                            | CH <sub>2</sub> CH <sub>3</sub>     | 95.0                    | 91.7, <sup>25</sup> 94.0, <sup>17</sup> 94.1, <sup>22</sup>                      |                       | 82.0                  |
| HOC(O) <sup>29</sup>                              | C(CH <sub>3</sub> ) <sub>3</sub>    | 95.2                    | 92.6, <sup>17</sup> 92.0 <sup>22</sup>                                           |                       | 78.4                  |
| HOC(O) <sup>30</sup>                              | CH <sub>2</sub> OH                  | 93.7                    | 93.6±2.5, <sup>22</sup> 92.3±2.5 <sup>25</sup>                                   |                       | 77.5                  |
| HOC(O) <sup>19</sup>                              | CH <sub>2</sub> CH=CH <sub>2</sub>  | 80.5                    | 78.7±1, <sup>25</sup> 80.9 <sup>22</sup>                                         |                       | 68.0                  |
| HOC(O)                                            | CH=CH <sub>2</sub>                  | 106.9                   | 106.7±1 <sup>17</sup>                                                            |                       | 91.6                  |
| HOC(O) <sup>19</sup>                              | Ph                                  | 109.7                   | 108.0±2 <sup>17</sup>                                                            |                       | 94.1                  |
| CH <sub>3</sub> C(O)                              | CH <sub>3</sub>                     | 83.9                    | 84.8, <sup>15</sup> 85.0 <sup>14</sup>                                           | 85.4                  | 74.3                  |
| CH <sub>3</sub> C(O)                              | CH <sub>2</sub> CH <sub>3</sub>     | 82.7                    | 83.5, <sup>16</sup> 83.4 <sup>14</sup>                                           |                       | 71.1                  |
| CH <sub>3</sub> C(O)                              | CH(CH <sub>3</sub> ) <sub>2</sub>   | 82.0                    | 81.3, <sup>15</sup> 82.8±1.1 <sup>14</sup>                                       |                       | 68.8                  |
| CH <sub>3</sub> C(O)                              | cyclo-C <sub>3</sub> H <sub>5</sub> | 93.6                    | 95.2, <sup>26</sup> 95.5, <sup>22</sup> 92.5±2.5 <sup>14</sup>                   |                       | 79.1                  |
| CH <sub>3</sub> C(O)                              | C(CH <sub>3</sub> ) <sub>3</sub>    | 81.7                    | 79.4, <sup>16</sup> 78.5 <sup>14</sup>                                           |                       | 67.5                  |
| CH <sub>3</sub> C(O)                              | CH <sub>2</sub> CH=CH <sub>2</sub>  | 68.8                    | 70.6, <sup>15</sup> 71.1±1 <sup>14</sup>                                         |                       | 57.1                  |
| CH <sub>3</sub> C(O)                              | CH <sub>2</sub> Ph                  | 71.9                    | 71.4, <sup>16</sup> 70.1±1.4 <sup>14</sup>                                       |                       | 59.7                  |
| CH <sub>3</sub> C(O)                              | CH=CH <sub>2</sub>                  | 95.5                    | 96.4±2.8, <sup>15</sup> 96.4±3 <sup>14</sup>                                     |                       | 80.7                  |
| CH <sub>3</sub> C(O)                              | Ph                                  | 98.0                    | 98.8±0.8, <sup>16</sup> 99.8±2.1 <sup>14</sup>                                   |                       | 83.2                  |
| NH <sub>2</sub> C(O)                              | CH <sub>3</sub>                     | 87.5                    | 88.2±1, <sup>25</sup> 86.5 <sup>17</sup>                                         |                       | 79.2                  |
| NH <sub>2</sub> C(O)                              | CH <sub>2</sub> CH <sub>3</sub>     | 86.7                    | 86.7±1, <sup>25</sup> 84.7 <sup>17</sup>                                         |                       | 76.0                  |
| NH <sub>2</sub> C(O)                              | CH(CH <sub>3</sub> ) <sub>2</sub>   | 86.3                    | 85.9±1, <sup>25</sup> 83.9 <sup>17</sup>                                         |                       | 73.7                  |
| NH <sub>2</sub> C(O)                              | CH=CH <sub>2</sub>                  | 99.2                    | 99.0±1.1, <sup>25</sup> 97.0±1.1 <sup>17</sup>                                   |                       | 85.6                  |
| NH <sub>2</sub> C(O)                              | Ph                                  | 101.8                   | 101.5±2.2 <sup>14</sup>                                                          |                       | 88.1                  |
| CH <sub>3</sub> O                                 | CH <sub>3</sub>                     | 81.5                    | 84.0, <sup>31</sup> 84.1, <sup>15</sup> 82.9±1 <sup>14</sup>                     | 82.6                  |                       |
| CH <sub>3</sub> O                                 | CH <sub>2</sub> CH <sub>3</sub>     | 83.9                    | 85.0, <sup>18</sup> 85.1, <sup>15</sup> 84.2 <sup>14</sup>                       | 80.5                  |                       |
| CH <sub>3</sub> O                                 | CH(CH <sub>3</sub> ) <sub>2</sub>   | 85.7                    | 85.8, <sup>18</sup> 86.3 <sup>14</sup>                                           | 78.5                  |                       |
| CH <sub>3</sub> O                                 | C(CH <sub>3</sub> ) <sub>3</sub>    | 86.8                    | 84.0, <sup>18</sup> 84.6, <sup>15</sup> 83.2 <sup>14</sup>                       | 76.9                  |                       |
| CH <sub>3</sub> O <sup>19</sup>                   | CH <sub>2</sub> Ph                  | 70.8                    | 72.7, <sup>15</sup> 71.6±1 <sup>14</sup>                                         | 68.4                  |                       |
| CH <sub>3</sub> O                                 | SiH <sub>3</sub>                    | 113.8                   | 111.9 <sup>31</sup>                                                              |                       |                       |
| CH <sub>3</sub> O                                 | PH <sub>2</sub>                     | 75.6                    | 78.2 <sup>31</sup>                                                               |                       |                       |
| CH <sub>3</sub> CH <sub>2</sub> O                 | CH <sub>3</sub>                     | 83.4                    | 83.5, <sup>15</sup> 83.3 <sup>14</sup>                                           | 81.9                  |                       |
| CH <sub>3</sub> CH <sub>2</sub> O                 | CH <sub>2</sub> CH <sub>3</sub>     | 86.0                    | 85.5, <sup>15</sup> 85.6 <sup>14</sup>                                           |                       |                       |
| HC(O)O                                            | CH <sub>3</sub>                     | 88.2                    | 87.1±4.2, <sup>16</sup> 86.1±4.2 <sup>15</sup>                                   |                       |                       |
| HC(O)O                                            | CH <sub>2</sub> CH <sub>3</sub>     | 91.0                    | 93.9, <sup>22</sup> 93.7 <sup>17</sup> 92.6±3 <sup>15</sup>                      |                       |                       |
| HC(O)O                                            | Ph                                  | 103.9                   | 106.1±3, <sup>16</sup> 103.5±3.1 <sup>15</sup>                                   |                       |                       |
| CH <sub>3</sub> C(O)O                             | CH <sub>3</sub>                     | 84.3                    | 88.1, <sup>22</sup> 86.1, <sup>17</sup> 90.1±3 <sup>15</sup>                     |                       |                       |
| CH <sub>3</sub> C(O)O                             | CH <sub>2</sub> CH <sub>3</sub>     | 87.0                    | 90.0, <sup>22</sup> 88.0, <sup>17</sup> 91.9±3, <sup>15</sup> 89.9 <sup>25</sup> |                       |                       |
| CH <sub>3</sub> C(O)O                             | CH(CH <sub>3</sub> ) <sub>2</sub>   | 89.0                    | 93.3, <sup>22</sup> 91.6, <sup>17</sup> 95±3.1 <sup>15</sup>                     |                       |                       |
| CH <sub>3</sub> C(O)O                             | C(CH <sub>3</sub> ) <sub>3</sub>    | 90.2                    | 91.5, <sup>22</sup> 89.7, <sup>17</sup> 91.7±3 <sup>15</sup>                     |                       |                       |
| CH <sub>3</sub> C(O)O                             | Ph                                  | 99.8                    | 101.3, <sup>25</sup> 102.7±3 <sup>15</sup>                                       |                       |                       |
| CH <sub>3</sub>                                   | OH                                  | 90.5                    | 92.2, <sup>31</sup> 92.1, <sup>18</sup> 92.4 <sup>14</sup>                       | 95.2                  |                       |
| CH <sub>3</sub> CH <sub>2</sub>                   | OH                                  | 93.2                    | 94.2, <sup>31</sup> 94.0 <sup>18</sup> , 94.0 <sup>14</sup>                      | 93.3                  |                       |
| (CH <sub>3</sub> ) <sub>2</sub> CH                | OH                                  | 95.2                    | 95.5, <sup>31</sup> 95.5 <sup>18</sup> , 96.5 <sup>14</sup>                      | 91.6                  |                       |
| cyclo-C <sub>3</sub> H <sub>5</sub> <sup>32</sup> | OH                                  | 99.5                    | 103.3, <sup>22</sup> 100.6±2.5 <sup>14</sup>                                     |                       |                       |
| (CH <sub>3</sub> ) <sub>3</sub> C                 | OH                                  | 96.4                    | 96.3, <sup>31</sup> 95.5, <sup>18</sup> 95.2, <sup>15</sup> 95.0 <sup>14</sup>   | 90.0                  |                       |
| CH <sub>2</sub> =CHCH <sub>2</sub>                | OH                                  | 77.1                    | 80.1, <sup>18</sup> 79.5±1, <sup>15</sup> 79.8 <sup>14</sup>                     | 77.9                  |                       |
| HC≡CCH <sub>2</sub>                               | OH                                  | 76.1                    | 77.5 <sup>33</sup>                                                               |                       |                       |
| PhCH <sub>2</sub>                                 | OH                                  | 79.8                    | 82.6, <sup>18</sup> 79.9, <sup>15</sup> 81.4 <sup>14</sup>                       | 80.9                  |                       |
| HOC(O)CH <sub>2</sub> <sup>34</sup>               | OH                                  | 81.7                    | 88.4±3.9 <sup>15</sup>                                                           |                       |                       |

<sup>29</sup> Allinger, L. N.; Schmitz, L. R.; Motoc, I.; Bender, C.; Labanowski, J. K. *J. Comput. Chem.* **1993**, *13*, 838–841.

<sup>30</sup>  $\Delta_f H^\circ[\text{HOCH}_2\text{CO}_2\text{H}] = -139.3 \pm 2.4 \text{ kcal mol}^{-1}$  from Dorofeeva, O.; Novikov, V. P.; Neumann, D. B. *J. Phys. Chem. Ref. Data* **2001**, *30*, 475–513.

<sup>31</sup> D value reported by the high level W1w calculation of Chan, B.; Radom, L. *J. Phys. Chem. A* **2012**, *116*, 4975–4986.

<sup>32</sup> Using  $\Delta_f H^\circ[\text{cyclo-C}_3\text{H}_5\text{OH}] = -24.2$  from the G3 calculation of Bond, D. *J. Org. Chem.* **2007**, *72*, 7313–7328.

<sup>33</sup> Dhanya, S.; Kumar, A.; Upadhyaya, H. P.; Naik, P. D.; Saini, R. D. *J. Phys. Chem. A* **2004**, *108*, 7646–7652.

| R· <sup>10</sup>                                   | ·R'             | D[R-R'] <sub>calc</sub> | D[R-R'] <sub>lit</sub> <sup>11</sup>                                                      | D[R-R'] <sup>12</sup> | D[R-R'] <sup>13</sup> |
|----------------------------------------------------|-----------------|-------------------------|-------------------------------------------------------------------------------------------|-----------------------|-----------------------|
| CH <sub>3</sub> O                                  | OH              | 43.2                    | 43.8, <sup>31</sup> 45.4, <sup>15</sup> 44.7 <sup>14</sup>                                | 51.5                  |                       |
| CH <sub>3</sub> CH <sub>2</sub> O                  | OH              | 42.3                    | 42.7±1.5 <sup>15</sup>                                                                    | 50.7                  |                       |
| CH <sub>3</sub> C(O)O                              | OH              | 41.8                    | 40.6 <sup>15</sup>                                                                        |                       |                       |
| HS                                                 | OH              | 68.9                    | 70.1, <sup>31</sup> 70.1±4 <sup>15</sup>                                                  | 73.2                  |                       |
| CH <sub>3</sub> S                                  | OH              | 72.4                    | 72.5, <sup>31</sup> 72.6±3 <sup>15</sup>                                                  | 71.4                  |                       |
| H <sub>2</sub> N <sup>19</sup>                     | OH              | 59.7                    | 63.7, <sup>31</sup> 63.4±2.2 <sup>15</sup>                                                | 78.1                  |                       |
| CH <sub>3</sub> NH                                 | OH              | 59.3                    | 63.2 <sup>31</sup>                                                                        |                       |                       |
| (CH <sub>3</sub> ) <sub>2</sub> N                  | OH              | 57.9                    | 62.2 <sup>31</sup>                                                                        |                       |                       |
| F                                                  | OH              | 47.2                    | 48.3, <sup>31</sup> 51.8 <sup>14</sup>                                                    | 52.9                  |                       |
| PH <sub>2</sub>                                    | OH              | 85.6                    | 89.9 <sup>31</sup>                                                                        |                       |                       |
| Cl                                                 | OH              | 55.1                    | 55.8, <sup>31</sup> 56.1 <sup>14</sup>                                                    | 66.5                  |                       |
| SiH <sub>3</sub>                                   | OH              | 125.6                   | 124.3, <sup>31</sup> 124.0 <sup>35</sup>                                                  |                       |                       |
| Br <sup>36</sup>                                   | OH              | 53.4                    | 55.7, <sup>25</sup> 55.1 <sup>14</sup>                                                    | 65.4                  |                       |
| CH <sub>3</sub>                                    | NH <sub>2</sub> | 82.9                    | 84.8, <sup>31</sup> 85.2, <sup>18</sup> 85.9 <sup>14</sup>                                | 87.3                  |                       |
| CH <sub>3</sub> CH <sub>2</sub>                    | NH <sub>2</sub> | 84.2                    | 85.5, <sup>31</sup> 84.8, <sup>16</sup> 86.7, <sup>15</sup> 87.7 <sup>14</sup>            |                       |                       |
| (CH <sub>3</sub> ) <sub>2</sub> CH                 | NH <sub>2</sub> | 85.3                    | 86.3, <sup>31</sup> 86.0, <sup>16</sup> 85.5, <sup>15</sup> 87.7 <sup>14</sup>            |                       |                       |
| cyclo-C <sub>3</sub> H <sub>5</sub> <sup>24a</sup> | NH <sub>2</sub> | 92.2                    | 93.8, <sup>22</sup> 90.8±2.5 <sup>15</sup>                                                |                       |                       |
| (CH <sub>3</sub> ) <sub>3</sub> C                  | NH <sub>2</sub> | 85.9                    | 86.2, <sup>31</sup> 85.7, <sup>16</sup> 85.0±1.5, <sup>15</sup> 85.3 <sup>14</sup>        |                       |                       |
| PhCH <sub>2</sub>                                  | NH <sub>2</sub> | 71.8                    | 71.7, <sup>16</sup> 73.3±1.5, <sup>15</sup> 74.0 <sup>14</sup>                            |                       |                       |
| CH <sub>3</sub> O <sup>19</sup>                    | NH <sub>2</sub> | 53.0                    | 55.6, <sup>31</sup> 55.6±2.2 <sup>14</sup>                                                | 66.2                  |                       |
| HS                                                 | NH <sub>2</sub> | 64.0                    | 66.8 <sup>31</sup>                                                                        | 67.7                  |                       |
| CH <sub>3</sub> S                                  | NH <sub>2</sub> | 65.5                    | 68.9 <sup>31</sup>                                                                        |                       |                       |
| CH <sub>3</sub> NH                                 | NH <sub>2</sub> | 61.6                    | 64.8 <sup>31</sup>                                                                        |                       |                       |
| (CH <sub>3</sub> ) <sub>2</sub> N                  | NH <sub>2</sub> | 60.0                    | 60.7 <sup>31</sup>                                                                        |                       |                       |
| PH <sub>2</sub>                                    | NH <sub>2</sub> | 73.5                    | 76.8 <sup>31</sup>                                                                        |                       |                       |
| SiH <sub>3</sub>                                   | NH <sub>2</sub> | 104.7                   | 103.4 <sup>31</sup>                                                                       |                       |                       |
| F <sup>19</sup>                                    | NH <sub>2</sub> | 67.4                    | 69.7, <sup>31</sup> 68.5±2.2, <sup>15</sup> 69.5±2.2 <sup>14</sup>                        | 82.6                  |                       |
| Cl <sup>19</sup>                                   | NH <sub>2</sub> | 60.3                    | 61.2, <sup>31</sup> 60.5, <sup>15</sup> 61.5 <sup>14</sup>                                |                       |                       |
| CH <sub>3</sub>                                    | F               | 109.9                   | 110.6, <sup>31</sup> 110.0±2, <sup>15</sup> 109.8 <sup>14</sup>                           | 114.4                 |                       |
| CH <sub>3</sub> CH <sub>2</sub>                    | F               | 114.1                   | 113.4, <sup>31</sup> 111.7±2 <sup>15</sup>                                                | 114.0                 |                       |
| (CH <sub>3</sub> ) <sub>2</sub> CH                 | F               | 117.2                   | 115.4, <sup>31</sup> 117.0, <sup>37</sup> 110.6, <sup>18</sup><br>115.5±2.2 <sup>15</sup> | 113.0                 |                       |
| cyclo-C <sub>3</sub> H <sub>5</sub> <sup>38</sup>  | F               | 118.6                   | 120.1±2.5 <sup>14</sup>                                                                   |                       |                       |
| (CH <sub>3</sub> ) <sub>3</sub> C                  | F               | 118.7                   | 116.9, <sup>31</sup> 117.0, <sup>37</sup> 118.2±2 <sup>15</sup>                           | 111.7                 |                       |
| CH <sub>2</sub> =CHCH <sub>2</sub> <sup>19</sup>   | F               | 97.1                    | 96.9, <sup>15</sup> 96.9 <sup>14</sup>                                                    | 97.0                  |                       |
| PhCH <sub>2</sub>                                  | F               | 99.7                    | 98.7, <sup>18</sup> 98.9, <sup>15</sup> 98.7±1 <sup>14</sup>                              | 100.0                 |                       |
| CH <sub>2</sub> =CH                                | F               | 121.7                   | 123.3, <sup>18</sup> 123.7±3, <sup>15</sup> 122.4±1 <sup>14</sup>                         | 123.5                 |                       |
| Ph                                                 | F               | 125.8                   | 127.1, <sup>18</sup> 125.6±2, <sup>15</sup> 127.7±2 <sup>14</sup>                         | 124.7                 |                       |
| HC≡C                                               | F               | 125.6                   | 124.6, <sup>15</sup> 122.0±2 <sup>14</sup>                                                |                       |                       |
| HC≡C <sup>24b</sup>                                | F               | 125.6                   | 129.1, <sup>15</sup> 126.5±2 <sup>14</sup>                                                |                       |                       |
| N≡C                                                | F               | 113.9                   | 115.4, <sup>15</sup> 114.4 <sup>14</sup>                                                  | 123.3                 |                       |
| HC(O)                                              | F               | 115.7                   | 119.2, <sup>15</sup> 119.4 <sup>14</sup>                                                  | 109.6                 |                       |
| CH <sub>3</sub> C(O)                               | F               | 119.3                   | 122.2, <sup>18</sup> 120.7 <sup>14</sup>                                                  | 111.7                 |                       |
| H <sub>2</sub> B <sup>40</sup>                     | F               | 170.1                   | 171.4, <sup>39</sup> 169.7±1.5 <sup>40</sup>                                              |                       |                       |
| O <sub>2</sub> N                                   | F               | 37.1                    | 46.0, <sup>25</sup> 52.9 <sup>14</sup>                                                    | 54.9                  |                       |
| CH <sub>3</sub> O                                  | F               | 44.1                    | 44.7 <sup>31</sup>                                                                        | 43.2                  |                       |

<sup>34</sup> Enthalpy of formation  $-139 \pm 3$  kcal mol<sup>-1</sup> from reference 25.

<sup>35</sup> McMillen, D. F.; Golden, D. M. *Annu. Rev. Phys. Chem.* **1982**, *33*, 493–532.

<sup>36</sup> Using  $\Delta_f H^\circ[\text{BrOH}] = -19.1$  kcal mol<sup>-1</sup> from reference 19 and  $\Delta_f H^\circ[\text{Br}\cdot]$  and  $\Delta_f H^\circ[\cdot\text{OH}]$  from reference 14.

<sup>37</sup> Luo, Y.-R.; Benson, S. W. *J. Phys. Chem.* **1997**, *101*, 3042–3044.

<sup>38</sup> Clark, T.; Spitznagel, G. W.; Klose, R.; Scheyer, P. v. R. *J. Am. Chem. Soc.* **1984**, *106*, 4412–4419 reported the enthalpy of formation of cyclopropyl fluoride as  $-34.2$  kcal mol<sup>-1</sup> by an early theoretical calculation at the 4.31G//4.31G level.

<sup>39</sup> Rablen, P. R.; Hartwig, J. F. *J. Am. Chem. Soc.* **1996**, *118*, 4648–4653. G2 calculation.

<sup>40</sup> Grant, D. J.; Dixon, D. A. *J. Phys. Chem. A* **2009**, *113*, 777–787. Theoretical CBS calculation.



| R· <sup>10</sup>                                  | ·R'             | D[R-R'] <sub>calc</sub> | D[R-R'] <sub>lit</sub> <sup>11</sup>                                               | D[R-R'] <sup>12</sup> | D[R-R'] <sup>13</sup> |
|---------------------------------------------------|-----------------|-------------------------|------------------------------------------------------------------------------------|-----------------------|-----------------------|
| CH <sub>3</sub> HN                                | F               | 68.0                    | 70.7 <sup>31</sup>                                                                 |                       |                       |
| (CH <sub>3</sub> ) <sub>2</sub> N                 | F               | 66.9                    | 71.1 <sup>31</sup>                                                                 |                       |                       |
| PH <sub>2</sub>                                   | F               | 109.9                   | 111.9 <sup>31</sup>                                                                |                       |                       |
| HS                                                | F               | 85.4                    | 82.9, <sup>31</sup> 83.8 <sup>25</sup>                                             | 86.4                  |                       |
| H <sub>3</sub> Si                                 | F               | 158.9                   | 152.2, <sup>31</sup> 156.9, <sup>41</sup> 156.9 <sup>15</sup>                      |                       |                       |
| F                                                 | F               | 36.7                    | 39.6, <sup>31</sup> 38.0 <sup>14</sup>                                             | 23.3                  |                       |
| Cl                                                | F               | 59.6                    | 60.9, <sup>31</sup> 61.3, <sup>25</sup> 60.0 <sup>14</sup>                         | 59.7                  |                       |
| CH <sub>2</sub> =CH                               | Cl              | 94.6                    | 95.2, <sup>15</sup> 94.7±1.2 <sup>14</sup>                                         |                       |                       |
| Ph                                                | Cl              | 97.9                    | 96.2±1, <sup>15</sup> 97±2 <sup>14</sup>                                           |                       |                       |
| HC≡C                                              | Cl              | 109.5                   | 110.1±2.4, <sup>25</sup> 113.5±1, <sup>15</sup> 110.9±2 <sup>14</sup>              |                       |                       |
| N≡C                                               | Cl              | 102.7                   | 101.2±1.2, <sup>25</sup> 101.0±2, <sup>15</sup> 100.0 <sup>14</sup>                |                       |                       |
| HC(O) <sup>24a</sup>                              | Cl              | 82.9                    | 83.3, <sup>15</sup> 83.4 <sup>14</sup>                                             |                       |                       |
| CH <sub>3</sub> C(O)                              | Cl              | 84.5                    | 86.6±1, <sup>15</sup> 87.1±1 <sup>14</sup>                                         |                       |                       |
| CH <sub>3</sub> O <sup>19</sup>                   | Cl              | 48.9                    | 48.5, <sup>31</sup> 48.0, <sup>15</sup> 47.1±1 <sup>14</sup>                       | 56.6                  |                       |
| CH <sub>3</sub> NH                                | Cl              | 59.2                    | 59.4 <sup>31</sup>                                                                 |                       |                       |
| (CH <sub>3</sub> ) <sub>2</sub> N                 | Cl              | 57.6                    | 57.3 <sup>31</sup>                                                                 |                       |                       |
| O <sub>2</sub> N                                  | Cl              | 34.2                    | 34.2, <sup>15</sup> 34.0 <sup>14</sup>                                             |                       |                       |
| S(O <sub>2</sub> )CH <sub>3</sub> <sup>24a</sup>  | Cl              | 67.2                    | 66.0, <sup>42</sup> 67.8 <sup>43</sup>                                             |                       |                       |
| PH <sub>2</sub>                                   | Cl              | 74.3                    | 78.2 <sup>31</sup>                                                                 |                       |                       |
| HS                                                | Cl              | 63.2                    | 64.0 <sup>31</sup>                                                                 | 60.4                  |                       |
| CH <sub>3</sub> S                                 | Cl              | 65.2                    | 64.0 <sup>31</sup>                                                                 |                       |                       |
| Br                                                | Cl              | 51.7                    | 52.2, <sup>25</sup> 52.2 <sup>14</sup>                                             |                       |                       |
| CH <sub>2</sub> =CH                               | BH <sub>2</sub> | 117.9                   | 118.6±1.5 <sup>44</sup>                                                            |                       |                       |
| HC≡C <sup>24b</sup>                               | BH <sub>2</sub> | 151.4                   | 149.1, <sup>44</sup> 148.2±2 <sup>45</sup>                                         |                       |                       |
| CH <sub>3</sub> C(O)                              | BH <sub>2</sub> | 95.2                    | 92.8±1.5 <sup>44</sup>                                                             |                       |                       |
| SiH <sub>3</sub>                                  | BH <sub>2</sub> | 89.7                    | 87.4 <sup>46</sup>                                                                 |                       |                       |
| CH <sub>3</sub>                                   | NO <sub>2</sub> | 60.4                    | 60.9, <sup>25</sup> 62.2, <sup>15</sup> 62.1 <sup>14</sup>                         | 61.6                  |                       |
| CH <sub>3</sub> CH <sub>2</sub>                   | NO <sub>2</sub> | 62.1                    | 61.6±0.4, <sup>16</sup> 61.0, <sup>15</sup> 60.8 <sup>14</sup>                     |                       |                       |
| (CH <sub>3</sub> ) <sub>2</sub> CH                | NO <sub>2</sub> | 63.4                    | 63.9, <sup>16</sup> 62.0, <sup>15</sup> 63.1 <sup>14</sup>                         |                       |                       |
| cyclo-C <sub>3</sub> H <sub>5</sub> <sup>20</sup> | NO <sub>2</sub> | 69.6                    | 73.2, <sup>26</sup> 73.6, <sup>22</sup> 70.6±2.5 <sup>14</sup>                     |                       |                       |
| (CH <sub>3</sub> ) <sub>3</sub> C                 | NO <sub>2</sub> | 64.2                    | 62.8, <sup>16</sup> 61.9, <sup>15</sup> 61.2 <sup>14</sup>                         |                       |                       |
| CH <sub>2</sub> =CHCH <sub>2</sub> <sup>19</sup>  | NO <sub>2</sub> | 46.5                    | 48.3±1 <sup>14</sup>                                                               |                       |                       |
| PhCH <sub>2</sub>                                 | NO <sub>2</sub> | 49.4                    | 50.5, <sup>16</sup> 50.3±1.5, <sup>15</sup> 50.1±1.2 <sup>14</sup>                 |                       |                       |
| CH <sub>3</sub>                                   | Br              | 69.6                    | 72.1, <sup>18</sup> 69.9 <sup>14</sup>                                             | 75.1                  |                       |
| CH <sub>3</sub> CH <sub>2</sub>                   | Br              | 70.4                    | 72.4, <sup>16</sup> 70.3, <sup>15</sup> 70.3 <sup>14</sup>                         |                       |                       |
| (CH <sub>3</sub> ) <sub>2</sub> CH                | Br              | 71.1                    | 73.9, <sup>16</sup> 71.5±1.5, <sup>15</sup> 71.6 <sup>14</sup>                     |                       |                       |
| (CH <sub>3</sub> ) <sub>3</sub> C                 | Br              | 71.6                    | 72.6, <sup>16</sup> 69.9±1.5, <sup>15</sup> 69.4, <sup>14</sup>                    |                       |                       |
| CH <sub>2</sub> =CHCH <sub>2</sub>                | Br              | 55.4                    | 59±1, <sup>16</sup> 55.5±1.2, <sup>15</sup> 56.2 <sup>14</sup>                     |                       |                       |
| HC≡CCH <sub>2</sub> <sup>47</sup>                 | Br              | 57.5                    | 58.6, <sup>15</sup> 55.6 <sup>14</sup>                                             |                       |                       |
| PhCH <sub>2</sub>                                 | Br              | 58.3                    | 63±1, <sup>16</sup> 59.0, <sup>48</sup> 57.2±1.5, <sup>15</sup> 56.2 <sup>14</sup> |                       |                       |

<sup>41</sup> Theoretical CCSD(T) calculations. Grant, D. J.; Dixon, D. A. *J. Phys. Chem. A* **2009**, *113*, 3656–3661.

<sup>42</sup> Theoretical CCSD(T) calculations to the CBS limit. Resende, S. M.; Ornellas, F. R. *Chem. Phys. Lett.* **2003**, *367*, 489–494.

<sup>43</sup> Theoretical G3(MP2) calculations. Frank, A. J.; Turecek, F. *J. Phys. Chem. A* **1999**, *103*, 5348–5361.

<sup>44</sup> Ochterski, J. W.; Petersson, G. A.; Wiberg, K. B. *J. Am. Chem. Soc.* **1995**, *117*, 11299–11308. An uncertainty of ±1.5 kcal mol<sup>-1</sup> is assumed for the reported G2 calculations.

<sup>45</sup> Δ<sub>f</sub>H°[BH<sub>2</sub>] = 78.4 kcal mol<sup>-1</sup> is from Feller, D.; Dixon, B. A.; Peterson, K. A. *J. Phys. Chem. A* **1998**, *102*, 7053–7059. Coupled cluster theoretical calculations. Δ<sub>f</sub>H°[HC≡C] = 135.6 from reference 15 was used for obtaining D[R-R']<sub>lit</sub>.

<sup>46</sup> Theoretical doubly polarized triple ζ STO basis set. Bickelhaupt, F. M.; Ziegler, T.; Schleyer, P. v. R. *Organometallics* **1996**, *15*, 1477–1487.

<sup>47</sup> Using Δ<sub>f</sub>H°[HC≡CCH<sub>2</sub>Br] = 52.2 from Ritter, E. R.; Bozzelli, J. W. *Int. J. Chem. Kinet.* **1991**, *23*, 767–778.

<sup>48</sup> Tsang, W. *J. Phys. Chem.* **1984**, *88*, 2812–2817.

| R· <sup>10</sup>                                 | ·R'                               | D[R-R'] <sub>calc</sub> | D[R-R'] <sub>lit</sub> <sup>11</sup>                                               | D[R-R'] <sup>12</sup> | D[R-R'] <sup>13</sup> |
|--------------------------------------------------|-----------------------------------|-------------------------|------------------------------------------------------------------------------------|-----------------------|-----------------------|
| CH <sub>2</sub> =CH                              | Br                                | 81.4                    | 80.8, <sup>16</sup> 79.3, <sup>15</sup> 78.8±2 <sup>14</sup>                       |                       |                       |
| HC≡C                                             | Br                                | 99.9                    | 98.2±2.1, <sup>15</sup> 95.2±2.5 <sup>14</sup>                                     |                       |                       |
| Ph                                               | Br                                | 84.4                    | 84±1, <sup>16</sup> 81.0±1.5, <sup>15</sup> 83.1±2.5 <sup>14</sup>                 |                       |                       |
| CH <sub>3</sub> C(O)                             | Br                                | 68.9                    | 71.7, <sup>16</sup> 70.6 <sup>14</sup>                                             |                       |                       |
| PhC(O)                                           | Br                                | 69.3                    | 68.1±1.5, <sup>17</sup> 64.4±2.5, <sup>49</sup> 66.0±3 <sup>15</sup>               |                       |                       |
| PH <sub>2</sub> <sup>24a</sup>                   | Br                                | 58.5                    | 65.2, <sup>50</sup> 63.1 <sup>51</sup>                                             |                       |                       |
| CH <sub>3</sub>                                  | SH                                | 73.1                    | 74.5, <sup>31</sup> 74.7, <sup>18</sup> 73.8 <sup>14</sup>                         | 72.3                  |                       |
| CH <sub>3</sub> CH <sub>2</sub>                  | SH                                | 73.0                    | 73.8, <sup>31</sup> 73.6, <sup>15</sup> 73.0 <sup>14</sup>                         | 70.5                  |                       |
| (CH <sub>3</sub> ) <sub>2</sub> CH               | SH                                | 73.1                    | 73.6, <sup>31</sup> 73.4, <sup>15</sup> 73.7 <sup>14</sup>                         | 68.8                  |                       |
| (CH <sub>3</sub> ) <sub>3</sub> C                | SH                                | 73.3                    | 73.0, <sup>31</sup> 72.0, <sup>15</sup> 70.3 <sup>14</sup>                         | 67.2                  |                       |
| CH <sub>2</sub> =CHCH <sub>2</sub> <sup>19</sup> | SH                                | 58.5                    | 59.2±2 <sup>14</sup>                                                               | 55.0                  |                       |
| PhCH <sub>2</sub>                                | SH                                | 61.5                    | 61.3±1.5, <sup>15</sup> 60.2±1 <sup>14</sup>                                       | 58.0                  |                       |
| Ph                                               | SH                                | 87.6                    | 86.9, <sup>18</sup> 86.2±1.5, <sup>15</sup> 87.4±2 <sup>14</sup>                   | 83.4                  |                       |
| CH <sub>2</sub> =CH                              | SH                                | 84.8                    | 83±3 <sup>52</sup>                                                                 |                       |                       |
| HC≡C                                             | SH                                | 107.2                   | 108.4, <sup>15</sup> 105.5±2 <sup>14</sup>                                         |                       |                       |
| CH <sub>3</sub> C(O) <sup>25</sup>               | SH                                | 69.7                    | 73.6±2, <sup>25</sup> 73.1±2 <sup>14</sup>                                         | 69.0                  |                       |
| CH <sub>3</sub> O                                | SH                                | 60.5                    | 61.2 <sup>31</sup>                                                                 | 62.0                  |                       |
| CH <sub>3</sub>                                  | SCH <sub>3</sub>                  | 72.0                    | 73.6, <sup>18</sup> 73.9 <sup>15</sup>                                             | 69.2                  |                       |
| CH <sub>3</sub> CH <sub>2</sub>                  | SCH <sub>3</sub>                  | 71.6                    | 72.6±1.6 <sup>15</sup>                                                             |                       |                       |
| (CH <sub>3</sub> ) <sub>2</sub> CH               | SCH <sub>3</sub>                  | 71.5                    | 72.2 <sup>15</sup>                                                                 |                       |                       |
| (CH <sub>3</sub> ) <sub>3</sub> C                | SCH <sub>3</sub>                  | 71.5                    | 70.2 <sup>15</sup>                                                                 |                       |                       |
| HC≡C <sup>24b</sup>                              | SCH <sub>3</sub>                  | 107.5                   | 109.0, <sup>15</sup> 105.6 <sup>14</sup>                                           |                       |                       |
| Ph                                               | SCH <sub>3</sub>                  | 86.4                    | 89.2±2.5, <sup>52</sup> 85.5±1 <sup>15</sup>                                       |                       |                       |
| CH <sub>2</sub> =CHCH <sub>2</sub>               | SCH <sub>3</sub>                  | 57.2                    | 58.7 <sup>15</sup>                                                                 |                       |                       |
| PhCH <sub>2</sub>                                | SCH <sub>3</sub>                  | 60.3                    | 60.5 <sup>15</sup>                                                                 |                       |                       |
| CH <sub>2</sub> =CHCH <sub>2</sub>               | S(O <sub>2</sub> )CH <sub>3</sub> | 56.7                    | 55 <sup>52</sup>                                                                   |                       |                       |
| Ph                                               | S(O <sub>2</sub> )CH <sub>3</sub> | 86.0                    | 83, <sup>52</sup> 90.2±2, <sup>43</sup> 88.4±2 <sup>45</sup>                       |                       |                       |
| CH <sub>2</sub> =CH                              | PH <sub>2</sub>                   | 84.7                    | 81.9±1.5, <sup>44</sup> 84.8 <sup>53</sup>                                         |                       |                       |
| HC≡C <sup>24b</sup>                              | PH <sub>2</sub>                   | 112.3                   | 109.9±1.5, <sup>44</sup> 116.9 <sup>53</sup>                                       |                       |                       |
| SiH <sub>3</sub>                                 | PH <sub>2</sub>                   | 69.4                    | 71.5, <sup>31</sup> 71.4±1.5, <sup>44</sup> 71.6, <sup>54</sup> 79.2 <sup>15</sup> |                       |                       |
| CH <sub>3</sub> NH                               | PH <sub>2</sub>                   | 70.3                    | 71.3 <sup>31</sup>                                                                 |                       |                       |
| (CH <sub>3</sub> ) <sub>2</sub> N                | PH <sub>2</sub>                   | 68.2                    | 63.0 <sup>31</sup>                                                                 |                       |                       |
| CH <sub>3</sub> <sup>19</sup>                    | SiH <sub>3</sub>                  | 92.6                    | 89.0, <sup>31</sup> 89.6±1.6 <sup>15</sup>                                         |                       |                       |
| CH <sub>3</sub> CH <sub>2</sub>                  | SiH <sub>3</sub>                  | 89.9                    | 87.8 <sup>55</sup>                                                                 |                       |                       |
| (CH <sub>3</sub> ) <sub>2</sub> CH               | SiH <sub>3</sub>                  | 88.1                    | 87.2 <sup>55</sup>                                                                 |                       |                       |
| CH <sub>2</sub> =CH                              | SiH <sub>3</sub>                  | 104.2                   | 100.2, <sup>55</sup> 101-107 <sup>55</sup>                                         |                       |                       |
| CH <sub>3</sub> NH                               | SiH <sub>3</sub>                  | 100.6                   | 96.8 <sup>31</sup>                                                                 |                       |                       |
| (CH <sub>3</sub> ) <sub>2</sub> N                | SiH <sub>3</sub>                  | 98.2                    | 91.2 <sup>31</sup>                                                                 |                       |                       |
| (CH <sub>3</sub> ) <sub>2</sub> N <sup>56</sup>  | CH <sub>2</sub> Ph                | 67.2                    | 65.0±2, <sup>17</sup> 68.1±1 <sup>15</sup>                                         |                       |                       |

<sup>49</sup> Using  $\Delta_f H^\circ[\text{PhC(O)}\cdot] = 26.1 \pm 2.5$  from Solly, R. K.; Benson, S.W. *J. Am. Chem. Soc.* **1971**, *93*, 1592–1595.

<sup>50</sup> Using the experimental value of  $\Delta_f H^\circ[\cdot\text{PH}_2] = 34.0$  from Berkowitz, J.; Curtiss, L. A.; Gibson, S. T.; Greene, J. P.; Hillhouse, G. L.; Pople, J. A. *J. Chem. Phys.* **1986**, *84*, 375–384.)

<sup>51</sup> Matus, M. H.; Nguyen, M. T.; Dixon, D. A. *J. Phys. Chem. A* **2007**, *111*, 1726–1736. Theoretical values of  $\Delta_f H^\circ[\text{H}_2\text{PCH}_3] = -5.0 \text{ kcal mol}^{-1}$  by CCSD(T)/CBS calculations and reported estimate of  $\Delta_f H^\circ[\text{PH}_2] = 31.8$ .

<sup>52</sup> Benson, S. W. *Chem. Rev.* **1978**, *78*, 23–35.

<sup>53</sup> Theoretical calculations at the MP2(full)/6-31+G(d,p) level. Boyd, S. R.; Boyd, R. J. *J. Am. Chem. Soc.* **1997**, *119*, 4214–4219.

<sup>54</sup> Theoretical calculations at the MP2/6-31G level. Baboul, A. G.; Schlegel, H. B. *J. Am. Chem. Soc.* **1996**, *118*, 8444–8451.

<sup>55</sup> Becerra, R.; Walsh, R. In *The Chemistry of Organic Silicon Compounds*; Rappoport, Z.; Apeloig, Y., Eds; Wiley: New York, 1998; Vol. 2, pp 153–180. Recommended values and range of theoretical values cited for CH<sub>2</sub>=CH–SiH<sub>3</sub>.)

<sup>56</sup> Verevkin, S. P. *J. Chem. Eng. Data* **1999**, *44*, 1245–1251.

| R· <sup>10</sup>                                     | ·R'                                | D[R-R'] <sub>calc</sub> | D[R-R'] <sub>lit</sub> <sup>11</sup> | D[R-R'] <sup>12</sup> | D[R-R'] <sup>13</sup> |
|------------------------------------------------------|------------------------------------|-------------------------|--------------------------------------|-----------------------|-----------------------|
| CH <sub>3</sub> C(O)                                 | SH                                 | 69.7                    | not found                            |                       |                       |
| CH <sub>3</sub> C(O)O                                | NH <sub>2</sub>                    | 52.0                    | not found                            |                       |                       |
| H <sub>2</sub> NC(O)                                 | SH                                 | 72.6                    | not found                            |                       |                       |
| H <sub>2</sub> NC(O)                                 | CH <sub>2</sub> Ph                 | 75.7                    | not found                            |                       |                       |
| Ph                                                   | S(O)CH <sub>3</sub>                | 63.5                    | not found                            |                       |                       |
| cyclo-C <sub>3</sub> H <sub>5</sub> -CH <sub>2</sub> | C≡CH                               | 123.0                   | not found                            |                       |                       |
| cyclo-C <sub>3</sub> H <sub>5</sub>                  | CH <sub>2</sub> CH=CH <sub>2</sub> | 83.4                    | not found                            |                       |                       |

**Table S3** Total Energies at Various Levels of Theory, Thermal Correction, Zero Point Vibrational Energies, High Level Corrections, Entropies and Enthalpies (units are Hartrees unless otherwise noted).<sup>57</sup>

| mol          | B3LYP/6-31G* | ROMP2/6-31G* | ROMP2/GTMP2Large | URCCSD(T)/6-31G* | Temperature Correction | Zero Point Vibrational Energy | High Level Correction | Spin Orbital Correction | Entropy (J/mol K) | G3(MP2)-RAD Enthalpy |
|--------------|--------------|--------------|------------------|------------------|------------------------|-------------------------------|-----------------------|-------------------------|-------------------|----------------------|
| r.H          | -0.50027     | -0.49823     | -0.49982         | -0.49823         | 0.00236                | 0.00000                       | -0.00189              | 0.00000                 | 114.60640         | -0.49935             |
| r.CH3        | -39.83829    | -39.66850    | -39.73045        | -39.69103        | 0.00405                | 0.02924                       | -0.03221              | 0.00000                 | 195.33720         | -39.75190            |
| r.Cl         | -460.13624   | -459.55290   | -459.63877       | -459.57046       | 0.00236                | 0.00000                       | -0.03020              | -0.00134                | 158.83930         | -459.68551           |
| r.CH3        | -39.83829    | -39.66850    | -39.73045        | -39.69103        | 0.00405                | 0.02924                       | -0.03221              | 0.00000                 | 195.33720         | -39.75190            |
| r.CH2CH3     | -79.15787    | -78.83551    | -78.94867        | -78.87477        | 0.00490                | 0.05849                       | -0.06045              | 0.00000                 | 255.49450         | -78.98498            |
| r.CH_CH3_2   | -118.47816   | -118.00532   | -118.16947       | -118.06103       | 0.00607                | 0.08690                       | -0.08869              | 0.00000                 | 292.39510         | -118.22089           |
| r.CH_CH2_2   | -117.21345   | -116.77786   | -116.92210       | -116.82583       | 0.00438                | 0.06584                       | -0.07927              | 0.00000                 | 257.19810         | -116.97912           |
| r.C_CH3_3    | -157.79832   | -157.17694   | -157.39216       | -157.24870       | 0.00733                | 0.11499                       | -0.11693              | 0.00000                 | 315.18600         | -157.45852           |
| r.CH=CH2     | -77.90121    | -77.61167    | -77.70619        | -77.64918        | 0.00404                | 0.03601                       | -0.05103              | 0.00000                 | 233.57700         | -77.75469            |
| r.CH=CHCH3   | -117.22015   | -116.78090   | -116.92668       | -116.83403       | 0.00507                | 0.06500                       | -0.07927              | 0.00000                 | 269.99710         | -116.98902           |
| r.CH=C_CH3_2 | -156.53929   | -155.95208   | -156.14965       | -156.02057       | 0.00632                | 0.09309                       | -0.10751              | 0.00000                 | 301.62440         | -156.22623           |
| r.Ph         | -231.56128   | -230.78241   | -231.02550       | -230.85634       | 0.00532                | 0.08592                       | -0.13575              | 0.00000                 | 287.89980         | -231.14395           |
| r.CCH        | -76.60444    | -76.36083    | -76.43322        | -76.39078        | 0.00411                | 0.01218                       | -0.04162              | 0.00000                 | 217.28910         | -76.48850            |
| r.CN         | -92.71175    | -92.46146    | -92.53732        | -92.48587        | 0.00330                | 0.00483                       | -0.04162              | 0.00000                 | 202.50370         | -92.59522            |
| r.CH2OH      | -115.05203   | -114.69645   | -114.84781       | -114.72395       | 0.00422                | 0.03679                       | -0.06045              | 0.00000                 | 239.29550         | -114.89475           |
| r.CH2F       | -139.06427   | -138.67917   | -138.85005       | -138.70244       | 0.00397                | 0.02443                       | -0.06045              | 0.00000                 | 235.28780         | -138.90536           |
| r.CH2Cl      | -499.43832   | -498.69814   | -498.84360       | -498.73291       | 0.00459                | 0.02224                       | -0.06045              | 0.00000                 | 257.70870         | -498.91198           |

<sup>57</sup> Red value indicates ONIOM values where COPh core was taken from COCH<sub>3</sub>, and SCH<sub>2</sub>Ph core was taken from SCH<sub>3</sub>.

| mol            | B3LYP/6-31G* | ROMP2/6-31G* | ROMP2/GTMP2Large | URCCSD(T)/6-31G* | Temperature Correction | Zero Point Vibrational Energy | High Level Correction | Spin Orbital Correction | Entropy (J/mol K) | G3(MP2)-RAD Enthalpy |
|----------------|--------------|--------------|------------------|------------------|------------------------|-------------------------------|-----------------------|-------------------------|-------------------|----------------------|
| r.CHO          | -113.85017   | -113.53452   | -113.65577       | -113.55322       | 0.00380                | 0.01282                       | -0.05103              | 0.00000                 | 224.39090         | -113.70887           |
| r.COCH3        | -153.17983   | -152.71201   | -152.88497       | -152.74720       | 0.00491                | 0.04256                       | -0.07927              | 0.00000                 | 269.00900         | -152.95196           |
| r.COOH         | -189.08783   | -188.58832   | -188.79490       | -188.61159       | 0.00413                | 0.02011                       | -0.07927              | 0.00000                 | 251.61430         | -188.87320           |
| r.COPh         | -344.92063   | -343.84871   | -344.20356       | -343.93201       | 0.00728                | 0.09588                       | -0.18282              | 0.00000                 | 339.20830         | -344.36652           |
| r.CONH2        | -169.23206   | -168.75266   | -168.94205       | -168.78072       | 0.00470                | 0.03222                       | -0.07927              | 0.00000                 | 261.02440         | -169.01246           |
| r.CONHCH3      | -208.54322   | -207.91254   | -208.15036       | -207.95741       | 0.00587                | 0.06099                       | -0.10751              | 0.00000                 | 300.79290         | -208.23588           |
| r.CON_CH3_2    | -247.85494   | -247.07471   | -247.36115       | -247.13582       | 0.00704                | 0.08877                       | -0.13575              | 0.00000                 | 324.15740         | -247.46220           |
| r.CON_CH2CH3_2 | -326.48666   | -325.41203   | -325.80154       | -325.50521       | 0.00951                | 0.14511                       | -0.19223              | 0.00000                 | 385.77900         | -325.93233           |
| r.COOCH3       | -228.39717   | -227.74458   | -227.99717       | -227.78513       | 0.00550                | 0.04857                       | -0.10751              | 0.00000                 | 290.80630         | -228.09116           |
| r.COOCH2CH3    | -267.71720   | -266.91599   | -267.21984       | -266.97269       | 0.00670                | 0.07661                       | -0.13575              | 0.00000                 | 322.52060         | -267.32898           |
| r.COOC_CH3_3   | -346.35214   | -345.26010   | -345.66658       | -345.34832       | 0.00918                | 0.13142                       | -0.19223              | 0.00000                 | 366.48610         | -345.80642           |
| r.F            | -99.71554    | -99.48729    | -99.59883        | -99.49886        | 0.00236                | 0.00000                       | -0.03020              | -0.00061                | 151.23030         | -99.63884            |
| r.Cl           | -460.13624   | -459.55290   | -459.63877       | -459.57046       | 0.00236                | 0.00000                       | -0.03020              | -0.00134                | 158.83930         | -459.68551           |
| r.Br           | -2573.83974  | -2572.32667  | -2572.74345      | -2572.19601      | 0.00236                | 0.00000                       | -0.03020              | -0.00560                | 168.99070         | -2572.64624          |
| r.OH           | -75.72345    | -75.52105    | -75.61461        | -75.53712        | 0.00330                | 0.00814                       | -0.03221              | 0.00000                 | 178.29190         | -75.65144            |
| r.OCH3         | -115.05046   | -114.68575   | -114.82548       | -114.72111       | 0.00395                | 0.03606                       | -0.06045              | 0.00000                 | 236.74820         | -114.88127           |
| r.OCH2CH3      | -154.37049   | -153.85615   | -154.04665       | -153.90809       | 0.00515                | 0.06401                       | -0.08869              | 0.00000                 | 273.48550         | -154.11811           |
| r.OCHO         | -189.07897   | -188.58122   | -188.78218       | -188.59775       | 0.00399                | 0.01939                       | -0.07927              | 0.00000                 | 245.30800         | -188.85462           |
| r.OCOCH3       | -228.41136   | -227.76284   | -228.01548       | -227.79546       | 0.00550                | 0.04706                       | -0.10751              | 0.00000                 | 298.36450         | -228.10305           |
| r.NH2          | -55.87262    | -55.69078    | -55.76632        | -55.71156        | 0.00378                | 0.01861                       | -0.03221              | 0.00000                 | 194.75530         | -55.79691            |
| r.NO2          | -205.07221   | -204.56594   | -204.77694       | -204.57474       | 0.00388                | 0.00865                       | -0.07927              | 0.00000                 | 240.10230         | -204.85248           |
| r.NHCH3        | -95.19086    | -94.85328    | -94.97721        | -94.89142        | 0.00438                | 0.04813                       | -0.06045              | 0.00000                 | 244.67580         | -95.02329            |
| r.N_CH3_2      | -134.50949   | -134.01953   | -134.19265       | -134.07445       | 0.00574                | 0.07610                       | -0.08869              | 0.00000                 | 282.96140         | -134.25442           |
| r.NHCHO        | -169.20001   | -168.71127   | -168.89466       | -168.75082       | 0.00453                | 0.03006                       | -0.07927              | 0.00000                 | 259.88580         | -168.97889           |

| mol            | B3LYP/6-31G* | ROMP2/6-31G* | ROMP2/GTMP2Large | URCCSD(T)/6-31G* | Temperature Correction | Zero Point Vibrational Energy | High Level Correction | Spin Orbital Correction | Entropy (J/mol K) | G3(MP2)-RAD Enthalpy |
|----------------|--------------|--------------|------------------|------------------|------------------------|-------------------------------|-----------------------|-------------------------|-------------------|----------------------|
| r.NHCOCH3      | -208.53211   | -207.89381   | -208.12834       | -207.94831       | 0.00576                | 0.05825                       | -0.10751              | 0.00000                 | 298.53360         | -208.22634           |
| r.SH           | -398.74002   | -398.16216   | -398.25169       | -398.18460       | 0.00330                | 0.00596                       | -0.03221              | 0.00000                 | 192.14650         | -398.29708           |
| r.SCH3         | -438.05972   | -437.33123   | -437.46922       | -437.36941       | 0.00413                | 0.03519                       | -0.06045              | 0.00000                 | 250.21660         | -437.52852           |
| r.SCH2Ph       | -669.10963   | -667.63195   | -668.00594       | -667.73392       | 0.00807                | 0.11601                       | -0.19223              | 0.00000                 | 368.62310         | -668.17607           |
| r.SOCH3        | -513.27328   | -512.35242   | -512.59283       | -512.40230       | 0.00512                | 0.03962                       | -0.08869              | 0.00000                 | 282.57460         | -512.68666           |
| r.SO2CH3       | -588.46015   | -587.37552   | -587.71050       | -587.41124       | 0.00570                | 0.04442                       | -0.11693              | 0.00000                 | 298.55040         | -587.81303           |
| r.BH2          | -25.93471    | -25.80417    | -25.83874        | -25.82154        | 0.00381                | 0.01430                       | -0.02280              | 0.00000                 | 194.22410         | -25.86079            |
| r.PH2          | -342.50422   | -341.93532   | -342.01816       | -341.96156       | 0.00380                | 0.01322                       | -0.03221              | 0.00000                 | 212.60110         | -342.05959           |
| r.SiH3         | -291.23226   | -290.67427   | -290.74995       | -290.69859       | 0.00396                | 0.02089                       | -0.03221              | 0.00000                 | 216.89840         | -290.78163           |
| r.CH2-CH=CH2   | -117.26035   | -116.82120   | -116.96999       | -116.87040       | 0.00477                | 0.06505                       | -0.07927              | 0.00000                 | 257.63340         | -117.02864           |
| r.CH2-CH_CH2_2 | -156.54436   | -155.96111   | -156.15944       | -156.02441       | 0.00595                | 0.09309                       | -0.10751              | 0.00000                 | 294.22650         | -156.23122           |
| r.CH2-CCH      | -116.00128   | -115.59762   | -115.72713       | -115.63993       | 0.00509                | 0.04021                       | -0.06986              | 0.00000                 | 255.12220         | -115.79399           |
| r.CH2-CN       | -132.09467   | -131.68718   | -131.81919       | -131.72198       | 0.00456                | 0.03061                       | -0.06986              | 0.00000                 | 247.97320         | -131.88869           |
| r.CH2-Ph       | -270.91514   | -269.98389   | -270.28287       | -270.07441       | 0.00662                | 0.11272                       | -0.16399              | 0.00000                 | 313.60160         | -270.41804           |
| r.CH2-NH2      | -95.19561    | -94.86098    | -94.99290        | -94.89435        | 0.00431                | 0.04954                       | -0.06045              | 0.00000                 | 241.75720         | -95.03288            |
| r.CH2-N_CH3_2  | -173.81714   | -173.18124   | -173.41233       | -173.24759       | 0.00654                | 0.10540                       | -0.11693              | 0.00000                 | 304.53400         | -173.48367           |
| r.CH2-Br       | -2613.12361  | -2611.45326  | -2611.92916      | -2611.33974      | 0.00445                | 0.02194                       | -0.06045              | 0.00000                 | 263.52990         | -2611.84970          |
| r.CH2-SH       | -438.03412   | -437.30110   | -437.44931       | -437.34150       | 0.00474                | 0.03129                       | -0.06045              | 0.00000                 | 258.74710         | -437.51412           |
| r.CH2-SCH3     | -477.35164   | -476.47042   | -476.66797       | -476.52632       | 0.00598                | 0.06087                       | -0.08869              | 0.00000                 | 295.61020         | -476.74571           |
| r.CH2-NO2      | -244.33932   | -243.67248   | -243.93951       | -243.70554       | 0.00522                | 0.03464                       | -0.10751              | 0.00000                 | 279.29760         | -244.04021           |
| r.CH2-SiH3     | -330.53971   | -329.82771   | -329.96052       | -329.87024       | 0.00545                | 0.04633                       | -0.06045              | 0.00000                 | 279.69730         | -330.01172           |
| r.CH2-COOH     | -228.41666   | -227.76446   | -228.02474       | -227.80521       | 0.00517                | 0.04742                       | -0.10751              | 0.00000                 | 281.66780         | -228.12041           |
| r.CH2-COCH3    | -192.49502   | -191.87306   | -192.09805       | -191.92755       | 0.00603                | 0.06931                       | -0.10751              | 0.00000                 | 304.02860         | -192.18471           |
| r.CH2-OCHO     | -228.39410   | -227.73858   | -227.99441       | -227.78033       | 0.00563                | 0.04650                       | -0.10751              | 0.00000                 | 288.73830         | -228.09155           |

| mol            | B3LYP/6-31G* | ROMP2/6-31G* | ROMP2/GTMP2Large | URCCSD(T)/6-31G* | Temperature Correction | Zero Point Vibrational Energy | High Level Correction | Spin Orbital Correction | Entropy (J/mol K) | G3(MP2)-RAD Enthalpy |
|----------------|--------------|--------------|------------------|------------------|------------------------|-------------------------------|-----------------------|-------------------------|-------------------|----------------------|
| r.CH2-OCOCH3   | -267.72026   | -266.91586   | -267.22321       | -266.97368       | 0.00721                | 0.07389                       | -0.13575              | 0.00000                 | 329.21990         | -267.33569           |
| r.CH2-CONH2    | -208.54679   | -207.91462   | -208.15793       | -207.96142       | 0.00569                | 0.05897                       | -0.10751              | 0.00000                 | 289.19710         | -208.24758           |
| r.CH2-SOCH3    | -552.51499   | -551.45076   | -551.74977       | -551.51041       | 0.00674                | 0.06431                       | -0.11693              | 0.00000                 | 314.27590         | -551.85529           |
| r.CH2-SO2CH3   | -627.72443   | -6.26E+02    | -6.27E+02        | -626.54633       | 0.00737                | 0.069639                      | -0.14516              |                         | 330.0708          | -627.01302           |
| n.H-CH3        | -40.51838    | -40.33253    | -40.40413        | -40.35591        | 0.00381                | 0.04434                       | -0.03765              | 0.00000                 | 186.08070         | -40.41701            |
| n.H-CH2CH3     | -79.83042    | -79.49468    | -79.61744        | -79.53449        | 0.00441                | 0.07378                       | -0.06589              | 0.00000                 | 227.41460         | -79.64495            |
| n.H-CH_CH3_2   | -119.14424   | -118.66023   | -118.83467       | -118.71621       | 0.00546                | 0.10209                       | -0.09413              | 0.00000                 | 268.07880         | -118.87724           |
| n.H-CH_CH2_2   | -117.89520   | -117.44850   | -117.60374       | -117.49637       | 0.00430                | 0.08015                       | -0.08472              | 0.00000                 | 236.83470         | -117.65187           |
| n.H-C_CH3_3    | -158.45881   | -157.82851   | -158.05505       | -157.90032       | 0.00663                | 0.12981                       | -0.12237              | 0.00000                 | 292.38800         | -158.11278           |
| n.H-CH=CH2     | -78.58746    | -78.28498    | -78.39082        | -78.32186        | 0.00399                | 0.05023                       | -0.05648              | 0.00000                 | 218.91460         | -78.42996            |
| n.H-CH=CHCH3   | -117.90756   | -117.45546   | -117.61276       | -117.50788       | 0.00502                | 0.07852                       | -0.08472              | 0.00000                 | 264.35670         | -117.66635           |
| n.H-CH=C_CH3_2 | -157.22729   | -156.62724   | -156.83637       | -156.69496       | 0.00624                | 0.10642                       | -0.11296              | 0.00000                 | 289.30120         | -156.90440           |
| n.H-Ph         | -232.24865   | -231.45773   | -231.71309       | -231.53072       | 0.00533                | 0.09878                       | -0.14120              | 0.00000                 | 268.03870         | -231.82315           |
| n.H-CCH        | -77.32565    | -77.06649    | -77.15444        | -77.09341        | 0.00388                | 0.02612                       | -0.04707              | 0.00000                 | 201.64490         | -77.19843            |
| n.H-CN         | -93.42262    | -93.15810    | -93.24878        | -93.17795        | 0.00348                | 0.01615                       | -0.04707              | 0.00000                 | 201.25910         | -93.29607            |
| n.H-CH2OH      | -115.71441   | -115.34608   | -115.50784       | -115.37463       | 0.00423                | 0.05048                       | -0.06589              | 0.00000                 | 237.34000         | -115.54757           |
| n.H-CH2F       | -139.73392   | -139.33575   | -139.51790       | -139.36018       | 0.00385                | 0.03874                       | -0.06589              | 0.00000                 | 222.52590         | -139.56562           |
| n.H-CH2Cl      | -500.10853   | -499.35433   | -499.50942       | -499.38972       | 0.00396                | 0.03738                       | -0.06589              | 0.00000                 | 234.19160         | -499.56937           |
| n.H-CHO        | -114.50047   | -114.16740   | -114.30010       | -114.19031       | 0.00381                | 0.02630                       | -0.05648              | 0.00000                 | 218.55900         | -114.34937           |
| n.H-COCH3      | -153.83012   | -153.34662   | -153.53058       | -153.38521       | 0.00484                | 0.05474                       | -0.08472              | 0.00000                 | 262.39280         | -153.59430           |
| n.H-COOH       | -189.75546   | -189.24162   | -189.46050       | -189.26667       | 0.00410                | 0.03327                       | -0.08472              | 0.00000                 | 248.16430         | -189.53289           |
| n.H-COPh       | -345.57344   | -344.48614   | -344.85256       | -344.57231       | 0.00724                | 0.10806                       | -0.18826              | 0.00000                 | 332.34440         | -345.01170           |
| n.H-CONH2      | -169.88884   | -169.39433   | -169.59627       | -169.42517       | 0.00494                | 0.04439                       | -0.08472              | 0.00000                 | 265.54310         | -169.66249           |
| n.H-CONHCH3    | -209.20043   | -208.55487   | -208.80517       | -208.60231       | 0.00589                | 0.07316                       | -0.11296              | 0.00000                 | 293.76770         | -208.88651           |

| mol              | B3LYP/6-31G* | ROMP2/6-31G* | ROMP2/GTMP2Large | URCCSD(T)/6-31G* | Temperature Correction | Zero Point Vibrational Energy | High Level Correction | Spin Orbital Correction | Entropy (J/mol K) | G3(MP2)-RAD Enthalpy |
|------------------|--------------|--------------|------------------|------------------|------------------------|-------------------------------|-----------------------|-------------------------|-------------------|----------------------|
| n.H-CON CH3 2    | -248.51225   | -247.71735   | -248.01631       | -247.78083       | 0.00703                | 0.10104                       | -0.14120              | 0.00000                 | 318.06470         | -248.11291           |
| n.H-CON_CH2CH3_2 | -327.14326   | -326.05440   | -326.45646       | -326.14993       | 0.00952                | 0.15738                       | -0.19767              | 0.00000                 | 379.00470         | -326.58276           |
| n.H-COOCH3       | -229.06301   | -228.39640   | -228.66166       | -228.43865       | 0.00548                | 0.06129                       | -0.11296              | 0.00000                 | 284.33290         | -228.75011           |
| n.H-COOCH2CH3    | -268.38210   | -267.56703   | -267.88353       | -267.62546       | 0.00669                | 0.08929                       | -0.14120              | 0.00000                 | 315.90620         | -267.98719           |
| n.H-COOC_CH3_3   | -347.01420   | -345.90884   | -346.32791       | -345.99873       | 0.00918                | 0.14412                       | -0.19767              | 0.00000                 | 360.31020         | -346.46217           |
| n.H-F            | -100.42017   | -100.18217   | -100.32428       | -100.18832       | 0.00330                | 0.00888                       | -0.03765              | 0.00000                 | 173.78320         | -100.35590           |
| n.H-Cl           | -460.79570   | -460.19230   | -460.30252       | -460.21158       | 0.00330                | 0.00656                       | -0.03765              | 0.00000                 | 186.66860         | -460.34960           |
| n.H-Br           | -2574.48183  | -2572.94897  | -2573.38526      | -2572.82045      | 0.00330                | 0.00584                       | -0.03765              | 0.00000                 | 198.53830         | -2573.28525          |
| n.H-OH           | -76.40895    | -76.19684    | -76.31475        | -76.20784        | 0.00378                | 0.02076                       | -0.03765              | 0.00000                 | 188.85250         | -76.33886            |
| n.H-OCH3         | -115.71441   | -115.34608   | -115.50783       | -115.37463       | 0.00423                | 0.05047                       | -0.06589              | 0.00000                 | 237.25380         | -115.54757           |
| n.H-OCH2CH3      | -155.03380   | -154.51687   | -154.72995       | -154.56154       | 0.00521                | 0.07875                       | -0.09413              | 0.00000                 | 269.15540         | -154.78479           |
| n.H-OCHO         | -189.75546   | -189.24161   | -189.46049       | -189.26667       | 0.00410                | 0.03326                       | -0.08472              | 0.00000                 | 248.16390         | -189.53290           |
| n.H-OCOCH3       | -229.08179   | -228.41875   | -228.68915       | -228.45989       | 0.00549                | 0.06085                       | -0.11296              | 0.00000                 | 287.19840         | -228.77690           |
| n.H-NH2          | -56.54795    | -56.35418    | -56.44804        | -56.37208        | 0.00380                | 0.03387                       | -0.03765              | 0.00000                 | 192.35690         | -56.46592            |
| n.H-NO2          | -205.68695   | -205.16040   | -205.38818       | -205.17772       | 0.00390                | 0.02158                       | -0.08472              | 0.00000                 | 238.21670         | -205.46473           |
| n.H-NHCH3        | -95.85321    | -95.50649    | -95.64776        | -95.54125        | 0.00433                | 0.06318                       | -0.06589              | 0.00000                 | 239.67250         | -95.68090            |
| n.H-N_CH3_2      | -135.16286   | -134.66519   | -134.85461       | -134.71637       | 0.00531                | 0.09121                       | -0.09413              | 0.00000                 | 270.54800         | -134.90340           |
| n.H-NHCHO        | -169.88884   | -169.39433   | -169.59627       | -169.42517       | 0.00494                | 0.04439                       | -0.08472              | 0.00000                 | 265.50860         | -169.66250           |
| n.H-NHCOCH3      | -209.21220   | -208.56873   | -208.82241       | -208.61564       | 0.00630                | 0.07220                       | -0.11296              | 0.00000                 | 308.87110         | -208.90378           |
| n.H-SH           | -399.38543   | -398.78830   | -398.89669       | -398.81344       | 0.00379                | 0.01485                       | -0.03765              | 0.00000                 | 205.69550         | -398.94085           |
| n.H-SCH3         | -438.69834   | -437.95246   | -438.10879       | -437.99325       | 0.00453                | 0.04549                       | -0.06589              | 0.00000                 | 253.19950         | -438.16545           |
| n.H-SCH2Ph       | -669.74903   | -668.25438   | -668.64674       | -668.35866       | 0.00845                | 0.12599                       | -0.19767              | 0.00000                 | 364.53590         | -668.81425           |
| n.H-SOCH3        | -513.85836   | -512.92961   | -513.18937       | -512.97352       | 0.00507                | 0.04982                       | -0.09413              | 0.00000                 | 274.88050         | -513.27252           |
| n.H-SO2CH3       | -589.06795   | -587.96725   | -588.32767       | -588.00864       | 0.00557                | 0.05600                       | -0.12237              | 0.00000                 | 290.71070         | -588.42986           |



| mol            | B3LYP/6-31G* | ROMP2/6-31G* | ROMP2/GTMP2Large | URCCSD(T)/6-31G* | Temperature Correction | Zero Point Vibrational Energy | High Level Correction | Spin Orbital Correction | Entropy (J/mol K) | G3(MP2)-RAD Enthalpy |
|----------------|--------------|--------------|------------------|------------------|------------------------|-------------------------------|-----------------------|-------------------------|-------------------|----------------------|
| n.H-BH2        | -26.61300    | -26.46424    | -26.50821        | -26.48464        | 0.00383                | 0.02599                       | -0.02824              | 0.00000                 | 188.29560         | -26.52704            |
| n.H-PH2        | -343.14028   | -342.55150   | -342.64931       | -342.58067       | 0.00384                | 0.02377                       | -0.03765              | 0.00000                 | 210.02530         | -342.68852           |
| n.H-SiH3       | -291.88369   | -291.30711   | -291.39627       | -291.33423       | 0.00401                | 0.03073                       | -0.03765              | 0.00000                 | 204.54420         | -291.42630           |
| n.CH3-CH=CH2   | -117.90756   | -117.45546   | -117.61275       | -117.50788       | 0.00502                | 0.07852                       | -0.08472              | 0.00000                 | 264.35010         | -117.66634           |
| n.CH3-CH-CH2_2 | -157.21201   | -156.61742   | -156.82429       | -156.68110       | 0.00557                | 0.10793                       | -0.11296              | 0.00000                 | 282.52240         | -156.88743           |
| n.CH3-CCH      | -116.65327   | -116.24149   | -116.38100       | -116.28374       | 0.00494                | 0.05463                       | -0.07530              | 0.00000                 | 247.69280         | -116.43898           |
| n.CH3-CN       | -132.75493   | -132.33746   | -132.48010       | -132.37279       | 0.00454                | 0.04475                       | -0.07530              | 0.00000                 | 242.28840         | -132.54143           |
| n.CH3-Ph       | -271.56664   | -270.62839   | -270.93538       | -270.71647       | 0.00718                | 0.12580                       | -0.16943              | 0.00000                 | 335.42470         | -271.05992           |
| n.CH3-NH2      | -95.85321    | -95.50649    | -95.64776        | -95.54125        | 0.00433                | 0.06318                       | -0.06589              | 0.00000                 | 239.66170         | -95.68090            |
| n.CH3-N-CH3_2  | -174.47440   | -173.82834   | -174.06692       | -173.89543       | 0.00636                | 0.11878                       | -0.12237              | 0.00000                 | 287.04120         | -174.13124           |
| n.CH3-Br       | -2613.79557  | -2612.11200  | -2612.59711      | -2611.99877      | 0.00404                | 0.03675                       | -0.06589              | 0.00000                 | 245.84520         | -2612.50898          |
| n.CH3-SH       | -438.69834   | -437.95246   | -438.10879       | -437.99325       | 0.00454                | 0.04548                       | -0.06589              | 0.00000                 | 253.26170         | -438.16545           |
| n.CH3-SCH3     | -478.01381   | -477.12074   | -477.32564       | -477.17686       | 0.00583                | 0.07484                       | -0.09413              | 0.00000                 | 283.79430         | -477.39520           |
| n.CH3-NO2      | -245.00933   | -244.33135   | -244.60822       | -244.36529       | 0.00533                | 0.04918                       | -0.11296              | 0.00000                 | 296.49140         | -244.70060           |
| n.CH3-SiH3     | -331.21087   | -330.48519   | -330.62917       | -330.52786       | 0.00514                | 0.06024                       | -0.06589              | 0.00000                 | 255.38040         | -330.67234           |
| n.CH3-COOH     | -229.08179   | -228.41875   | -228.68915       | -228.45989       | 0.00549                | 0.06085                       | -0.11296              | 0.00000                 | 287.33100         | -228.77690           |
| n.CH3-COCH3    | -193.15569   | -192.52362   | -192.75895       | -192.57801       | 0.00634                | 0.08248                       | -0.11296              | 0.00000                 | 299.45770         | -192.83749           |
| n.CH3-OCHO     | -229.06301   | -228.39640   | -228.66166       | -228.43865       | 0.00548                | 0.06129                       | -0.11296              | 0.00000                 | 284.34920         | -228.75010           |
| n.CH3-OCOCH3   | -268.38848   | -267.57298   | -267.88986       | -267.63136       | 0.00713                | 0.08853                       | -0.14120              | 0.00000                 | 325.41280         | -267.99379           |
| n.CH3-CONH2    | -209.21220   | -208.56875   | -208.82241       | -208.61566       | 0.00628                | 0.07222                       | -0.11296              | 0.00000                 | 307.18250         | -208.90379           |
| n.CH3-SOCH3    | -553.18693   | -552.11174   | -552.42079       | -552.17071       | 0.00661                | 0.07831                       | -0.12237              | 0.00000                 | 307.86360         | -552.51721           |
| n.CH3-SO2CH3   | -628.40082   | -627.15372   | -627.56263       | -627.21070       | 0.00715                | 0.08401                       | -0.15061              | 0.00000                 | 315.50470         | -627.67906           |
| n.CH3-CH3      | -79.83042    | -79.49469    | -79.61745        | -79.53449        | 0.00441                | 0.07378                       | -0.06589              | 0.00000                 | 227.44250         | -79.64495            |
| n.CH3-CH2CH3   | -119.14424   | -118.66023   | -118.83469       | -118.71621       | 0.00545                | 0.10211                       | -0.09413              | 0.00000                 | 268.05180         | -118.87723           |

| mol                | B3LYP/6-31G* | ROMP2/6-31G* | ROMP2/GTMP2Large | URCCSD(T)/6-31G* | Temperature Correction | Zero Point Vibrational Energy | High Level Correction | Spin Orbital Correction | Entropy (J/mol K) | G3(MP2)-RAD Enthalpy |
|--------------------|--------------|--------------|------------------|------------------|------------------------|-------------------------------|-----------------------|-------------------------|-------------------|----------------------|
| n.CH3-CH CH3_2     | -158.45881   | -157.82853   | -158.05507       | -157.90033       | 0.00663                | 0.12982                       | -0.12237              | 0.00000                 | 292.30840         | -158.11278           |
| n.CH3-CH_CH2_2     | -157.21201   | -156.61742   | -156.82429       | -156.68110       | 0.00557                | 0.10793                       | -0.11296              | 0.00000                 | 282.52240         | -156.88743           |
| n.CH3-C_CH3_3      | -197.77298   | -196.99876   | -197.27771       | -197.08594       | 0.00786                | 0.15720                       | -0.15061              | 0.00000                 | 304.74260         | -197.35043           |
| n.CH3-CH=CH2       | -117.90756   | -117.45546   | -117.61275       | -117.50788       | 0.00502                | 0.07852                       | -0.08472              | 0.00000                 | 264.35010         | -117.66634           |
| n.CH3-CH=CHCH3     | -157.22691   | -156.62579   | -156.83407       | -156.69375       | 0.00641                | 0.10639                       | -0.11296              | 0.00000                 | 291.84240         | -156.90219           |
| n.CH3-CH=C_CH3_2   | -196.54358   | -195.79482   | -196.05528       | -195.87811       | 0.00780                | 0.13420                       | -0.14120              | 0.00000                 | 330.48630         | -196.13778           |
| n.CH3-Ph           | -271.56664   | -270.62839   | -270.93538       | -270.71647       | 0.00718                | 0.12580                       | -0.16943              | 0.00000                 | 335.42470         | -271.05992           |
| n.CH3-CCH          | -116.65327   | -116.24149   | -116.38100       | -116.28374       | 0.00494                | 0.05463                       | -0.07530              | 0.00000                 | 247.69280         | -116.43898           |
| n.CH3-CN           | -132.75493   | -132.33746   | -132.48010       | -132.37279       | 0.00454                | 0.04475                       | -0.07530              | 0.00000                 | 242.28840         | -132.54143           |
| n.CH3-CH2OH        | -155.03380   | -154.51687   | -154.72996       | -154.56154       | 0.00521                | 0.07875                       | -0.09413              | 0.00000                 | 269.25140         | -154.78479           |
| n.CH3-CH2F         | -179.05642   | -178.50862   | -178.74088       | -178.54932       | 0.00477                | 0.06719                       | -0.09413              | 0.00000                 | 263.30480         | -178.80375           |
| n.CH3-CH2Cl        | -539.42626   | -538.52362   | -538.73034       | -538.57499       | 0.00497                | 0.06582                       | -0.09413              | 0.00000                 | 274.65960         | -538.80505           |
| n.CH3-CHO          | -153.83012   | -153.34663   | -153.53058       | -153.38522       | 0.00484                | 0.05474                       | -0.08472              | 0.00000                 | 262.35150         | -153.59430           |
| n.CH3-COCH3        | -193.15569   | -192.52362   | -192.75895       | -192.57801       | 0.00634                | 0.08248                       | -0.11296              | 0.00000                 | 299.45770         | -192.83749           |
| n.CH3-COOH         | -229.08179   | -228.41875   | -228.68915       | -228.45989       | 0.00549                | 0.06085                       | -0.11296              | 0.00000                 | 287.33100         | -228.77690           |
| n.CH3-COPh         | -384.89599   | -383.66137   | -384.07952       | -383.76334       | 0.00876                | 0.13575                       | -0.21650              | 0.00000                 | 364.91780         | -384.25348           |
| n.CH3-CONH2        | -209.21220   | -208.56875   | -208.82241       | -208.61566       | 0.00628                | 0.07222                       | -0.11296              | 0.00000                 | 307.18250         | -208.90379           |
| n.CH3-CONHCH3      | -248.52356   | -247.72933   | -248.03131       | -247.79281       | 0.00750                | 0.10058                       | -0.14120              | 0.00000                 | 333.83500         | -248.12789           |
| n.CH3-CON_CH3_2    | -287.83021   | -286.88756   | -287.23843       | -286.96721       | 0.00866                | 0.12846                       | -0.16943              | 0.00000                 | 357.01760         | -287.35040           |
| n.CH3-CON_CH2CH3_2 | -366.46181   | -365.22595   | -365.68006       | -365.33762       | 0.01094                | 0.18502                       | -0.22591              | 0.00000                 | 405.10050         | -365.82169           |
| n.CH3-COOCH3       | -268.38848   | -267.57298   | -267.88987       | -267.63136       | 0.00713                | 0.08853                       | -0.14120              | 0.00000                 | 325.41890         | -267.99379           |
| n.CH3-COOCH2CH3    | -307.70744   | -306.74359   | -307.11166       | -306.81817       | 0.00838                | 0.11648                       | -0.16943              | 0.00000                 | 356.88860         | -307.23081           |
| n.CH3-COOC_CH3_3   | -386.33898   | -385.08519   | -385.55584       | -385.19123       | 0.01091                | 0.17125                       | -0.22591              | 0.00000                 | 400.60390         | -385.70562           |
| n.CH3-F            | -139.73392   | -139.33575   | -139.51790       | -139.36017       | 0.00385                | 0.03874                       | -0.06589              | 0.00000                 | 222.52450         | -139.56562           |

| mol                | B3LYP/6-31G* | ROMP2/6-31G* | ROMP2/GTMP2Large | URCCSD(T)/6-31G* | Temperature Correction | Zero Point Vibrational Energy | High Level Correction | Spin Orbital Correction | Entropy (J/mol K) | G3(MP2)-RAD Enthalpy |
|--------------------|--------------|--------------|------------------|------------------|------------------------|-------------------------------|-----------------------|-------------------------|-------------------|----------------------|
| n.CH3-Cl           | -500.10853   | -499.35432   | -499.50941       | -499.38972       | 0.00396                | 0.03738                       | -0.06589              | 0.00000                 | 234.19930         | -499.56936           |
| n.CH3-Br           | -2613.79557  | -2612.11200  | -2612.59711      | -2611.99877      | 0.00404                | 0.03675                       | -0.06589              | 0.00000                 | 245.84520         | -2612.50898          |
| n.CH3-OH           | -115.71441   | -115.34608   | -115.50784       | -115.37463       | 0.00423                | 0.05047                       | -0.06589              | 0.00000                 | 237.33120         | -115.54758           |
| n.CH3-OCH3         | -155.02505   | -154.50332   | -154.70972       | -154.54895       | 0.00523                | 0.07876                       | -0.09413              | 0.00000                 | 263.58320         | -154.76549           |
| n.CH3-OCH2CH3      | -194.34430   | -193.67435   | -193.93208       | -193.73609       | 0.00646                | 0.10681                       | -0.12237              | 0.00000                 | 301.19910         | -194.00293           |
| n.CH3-OCHO         | -229.06301   | -228.39640   | -228.66166       | -228.43865       | 0.00548                | 0.06129                       | -0.11296              | 0.00000                 | 284.34920         | -228.75010           |
| n.CH3-OCOCH3       | -268.38848   | -267.57298   | -267.88986       | -267.63136       | 0.00713                | 0.08853                       | -0.14120              | 0.00000                 | 325.41280         | -267.99379           |
| n.CH3-NH2          | -95.85321    | -95.50649    | -95.64776        | -95.54125        | 0.00433                | 0.06318                       | -0.06589              | 0.00000                 | 239.66170         | -95.68090            |
| n.CH3-NO2          | -245.00933   | -244.33135   | -244.60822       | -244.36529       | 0.00533                | 0.04918                       | -0.11296              | 0.00000                 | 296.49140         | -244.70060           |
| n.CH3-NHCH3        | -135.16286   | -134.66519   | -134.85461       | -134.71637       | 0.00531                | 0.09121                       | -0.09413              | 0.00000                 | 270.54590         | -134.90340           |
| n.CH3-N-CH3_2      | -174.47440   | -173.82834   | -174.06692       | -173.89543       | 0.00636                | 0.11878                       | -0.12237              | 0.00000                 | 287.04120         | -174.13124           |
| n.CH3-NHCHO        | -209.20043   | -208.55487   | -208.80517       | -208.60231       | 0.00589                | 0.07316                       | -0.11296              | 0.00000                 | 293.79870         | -208.88651           |
| n.CH3-NHCOCH3      | -248.52356   | -247.72933   | -248.03131       | -247.79281       | 0.00750                | 0.10058                       | -0.14120              | 0.00000                 | 333.83730         | -248.12789           |
| n.CH3-SH           | -438.69834   | -437.95246   | -438.10879       | -437.99325       | 0.00454                | 0.04548                       | -0.06589              | 0.00000                 | 253.26170         | -438.16545           |
| n.CH3-SCH3         | -478.01381   | -477.12074   | -477.32564       | -477.17686       | 0.00583                | 0.07484                       | -0.09413              | 0.00000                 | 283.79430         | -477.39520           |
| n.CH3-SCH2Ph       | -709.06456   | -707.42422   | -707.86554       | -707.54341       | 0.00994                | 0.15526                       | -0.22591              | 0.00000                 | 398.14440         | -708.04544           |
| n.CH3-SOCH3        | -553.18693   | -552.11174   | -552.42079       | -552.17071       | 0.00661                | 0.07831                       | -0.12237              | 0.00000                 | 307.86360         | -552.51721           |
| n.CH3-SO2CH3       | -628.40082   | -627.15372   | -627.56263       | -627.21070       | 0.00715                | 0.08401                       | -0.15061              | 0.00000                 | 315.50470         | -627.67906           |
| n.CH3-BH2          | -65.94666    | -65.64636    | -65.74488        | -65.68326        | 0.00485                | 0.05500                       | -0.05648              | 0.00000                 | 248.73050         | -65.77841            |
| n.CH3-PH2          | -382.45777   | -381.72097   | -381.87066       | -381.76549       | 0.00472                | 0.05382                       | -0.06589              | 0.00000                 | 257.63620         | -381.92253           |
| n.CH3-SiH3         | -331.21087   | -330.48519   | -330.62917       | -330.52786       | 0.00514                | 0.06024                       | -0.06589              | 0.00000                 | 255.38040         | -330.67234           |
| n.CH2-CH3-CH=CH2   | -157.22036   | -156.62026   | -156.82978       | -156.68872       | 0.00608                | 0.10703                       | -0.11296              | 0.00000                 | 293.10550         | -156.89808           |
| n.CH2-CH3-CH-CH2_2 | -196.52593   | -195.78352   | -196.04229       | -195.86320       | 0.00683                | 0.13611                       | -0.14120              | 0.00000                 | 313.63130         | -196.12022           |
| n.CH2-CH3-CCH      | -155.96688   | -155.40705   | -155.59802       | -155.46516       | 0.00598                | 0.08327                       | -0.10354              | 0.00000                 | 289.15560         | -155.67041           |

| mol                | B3LYP/6-31G* | ROMP2/6-31G* | ROMP2/GTMP2Large | URCCSD(T)/6-31G* | Temperature Correction | Zero Point Vibrational Energy | High Level Correction | Spin Orbital Correction | Entropy (J/mol K) | G3(MP2)-RAD Enthalpy |
|--------------------|--------------|--------------|------------------|------------------|------------------------|-------------------------------|-----------------------|-------------------------|-------------------|----------------------|
| n.CH2_CH3_-CN      | -172.06867   | -171.50275   | -171.69700       | -171.55406       | 0.00561                | 0.07336                       | -0.10354              | 0.00000                 | 284.34700         | -171.77288           |
| n.CH2_CH3_-Ph      | -310.88023   | -309.79502   | -310.15383       | -309.89867       | 0.00827                | 0.15432                       | -0.19767              | 0.00000                 | 356.33900         | -310.29256           |
| n.CH2_CH3_-NH2     | -135.17073   | -134.67545   | -134.86766       | -134.72638       | 0.00529                | 0.09148                       | -0.09413              | 0.00000                 | 270.60100         | -134.91595           |
| n.CH2_CH3_-N_CH3_2 | -213.78720   | -212.99347   | -213.28346       | -213.07670       | 0.00771                | 0.14683                       | -0.15061              | 0.00000                 | 327.69760         | -213.36275           |
| n.CH2_CH3_-Br      | -2653.11274  | -2651.28094  | -2651.81755      | -2651.18338      | 0.00510                | 0.06520                       | -0.09413              | 0.00000                 | 286.46290         | -2651.74382          |
| n.CH2_CH3_-SH      | -478.01289   | -477.11920   | -477.32729       | -477.17587       | 0.00564                | 0.07392                       | -0.09413              | 0.00000                 | 285.47030         | -477.39852           |
| n.CH2_CH3_-SCH3    | -517.32822   | -516.28751   | -516.54429       | -516.35947       | 0.00713                | 0.10316                       | -0.12237              | 0.00000                 | 322.43750         | -516.62833           |
| n.CH2_CH3_-NO2     | -284.32809   | -283.50154   | -283.82909       | -283.55166       | 0.00638                | 0.07753                       | -0.14120              | 0.00000                 | 315.12570         | -283.93650           |
| n.CH2_CH3_-SiH3    | -370.52075   | -369.64669   | -369.84199       | -369.70566       | 0.00634                | 0.08876                       | -0.09413              | 0.00000                 | 297.70010         | -369.89999           |
| n.CH2_CH3_-COOH    | -268.39662   | -267.58514   | -267.90697       | -267.64246       | 0.00668                | 0.08916                       | -0.14120              | 0.00000                 | 317.07480         | -268.00965           |
| n.CH2_CH3_-COCH3   | -232.47056   | -231.69046   | -231.97702       | -231.76096       | 0.00756                | 0.11081                       | -0.14120              | 0.00000                 | 337.54630         | -232.07035           |
| n.CH2_CH3_-OCHO    | -268.38210   | -267.56702   | -267.88353       | -267.62546       | 0.00669                | 0.08928                       | -0.14120              | 0.00000                 | 316.00360         | -267.98719           |
| n.CH2_CH3_-OCOCH3  | -307.70744   | -306.74359   | -307.11166       | -306.81817       | 0.00838                | 0.11648                       | -0.16943              | 0.00000                 | 357.01750         | -307.23081           |
| n.CH2_CH3_-CONH2   | -248.52685   | -247.73539   | -248.04008       | -247.79851       | 0.00730                | 0.10072                       | -0.14120              | 0.00000                 | 329.01430         | -248.13636           |
| n.CH2_CH3_-SOCH3   | -592.51383   | -591.28892   | -591.62911       | -591.36708       | 0.00808                | 0.10748                       | -0.15061              | 0.00000                 | 346.47970         | -591.74233           |
| n.CH2_CH3_-SO2CH3  | -667.71677   | -666.32196   | -666.78212       | -666.39502       | 0.00852                | 0.11233                       | -0.17885              | 0.00000                 | 353.51640         | -666.91317           |
| n.Cl-CH3           | -500.10853   | -499.35432   | -499.50941       | -499.38972       | 0.00396                | 0.03738                       | -0.06589              | 0.00000                 | 234.19720         | -499.56937           |
| n.Cl-CH2CH3        | -539.42626   | -538.52362   | -538.73034       | -538.57500       | 0.00497                | 0.06581                       | -0.09413              | 0.00000                 | 274.69290         | -538.80506           |
| n.Cl-CH_CH3_2      | -578.74360   | -577.69454   | -577.95320       | -577.76164       | 0.00620                | 0.09351                       | -0.12237              | 0.00000                 | 302.38830         | -578.04296           |
| n.Cl-CH_CH2_2      | -577.49014   | -576.47773   | -576.71559       | -576.53684       | 0.00510                | 0.07134                       | -0.11296              | 0.00000                 | 283.08490         | -576.81121           |
| n.Cl-C_CH3_3       | -618.05960   | -616.86639   | -617.17719       | -616.94887       | 0.00750                | 0.12081                       | -0.15061              | 0.00000                 | 317.41640         | -617.28196           |
| n.Cl-CH=CH2        | -538.18539   | -537.31633   | -537.50505       | -537.36398       | 0.00448                | 0.04202                       | -0.08472              | 0.00000                 | 263.57390         | -537.59093           |
| n.Cl-CH=CHCH3      | -577.50527   | -576.48711   | -576.72684       | -576.55030       | 0.00594                | 0.06995                       | -0.11296              | 0.00000                 | 296.88280         | -576.82710           |
| n.Cl-CH=C_CH3_2    | -616.82480   | -615.65938   | -615.95135       | -615.73773       | 0.00731                | 0.09775                       | -0.14120              | 0.00000                 | 328.91140         | -616.06585           |

| mol               | B3LYP/6-31G* | ROMP2/6-31G* | ROMP2/GTMP2Large | URCCSD(T)/6-31G* | Temperature Correction | Zero Point Vibrational Energy | High Level Correction | Spin Orbital Correction | Entropy (J/mol K) | G3(MP2)-RAD Enthalpy |
|-------------------|--------------|--------------|------------------|------------------|------------------------|-------------------------------|-----------------------|-------------------------|-------------------|----------------------|
| n.Cl-Ph           | -691.84497   | -690.49045   | -690.82887       | -690.57353       | 0.00645                | 0.08944                       | -0.16943              | 0.00000                 | 313.11930         | -690.98550           |
| n.Cl-CCH          | -536.91326   | -536.08626   | -536.25866       | -536.12379       | 0.00456                | 0.01845                       | -0.07530              | 0.00000                 | 242.96280         | -536.34849           |
| n.Cl-CN           | -553.00829   | -552.17531   | -552.35109       | -552.20599       | 0.00404                | 0.00860                       | -0.07530              | 0.00000                 | 235.59390         | -552.44443           |
| n.Cl-CH2OH        | -575.31848   | -574.38129   | -574.62606       | -574.42127       | 0.00462                | 0.04273                       | -0.09413              | 0.00000                 | 268.74190         | -574.71281           |
| n.Cl-CH2F         | -599.33194   | -598.36536   | -598.63043       | -598.40131       | 0.00429                | 0.03069                       | -0.09413              | 0.00000                 | 264.50250         | -598.72553           |
| n.Cl-CH2Cl        | -959.69635   | -958.37554   | -958.61630       | -958.42234       | 0.00452                | 0.02906                       | -0.09413              | 0.00000                 | 270.21460         | -958.72367           |
| n.Cl-CHO          | -574.11700   | -573.21557   | -573.43210       | -573.24831       | 0.00420                | 0.01888                       | -0.08472              | 0.00000                 | 259.15660         | -573.52649           |
| n.Cl-COCH3        | -613.44592   | -612.39573   | -612.66345       | -612.44380       | 0.00558                | 0.04667                       | -0.11296              | 0.00000                 | 294.14010         | -612.77223           |
| n.Cl-COOH         | -649.35491   | -648.27432   | -648.57698       | -648.30978       | 0.00475                | 0.02445                       | -0.11296              | 0.00000                 | 278.94000         | -648.69620           |
| n.Cl-COPh         | -805.18497   | -803.53241   | -803.98256       | -803.62793       | 0.00831                | 0.09935                       | -0.21650              | 0.00000                 | 364.47400         | -804.18693           |
| n.Cl-CONH2        | -629.49699   | -628.43582   | -628.72082       | -628.47648       | 0.00552                | 0.03601                       | -0.11296              | 0.00000                 | 292.33560         | -628.83290           |
| n.Cl-CONHCH3      | -668.80892   | -667.59727   | -667.93072       | -667.65444       | 0.00694                | 0.06427                       | -0.14120              | 0.00000                 | 331.09820         | -668.05786           |
| n.Cl-CON_CH3_2    | -708.11481   | -706.75457   | -707.13775       | -706.82776       | 0.00837                | 0.09189                       | -0.16943              | 0.00000                 | 363.82510         | -707.28012           |
| n.Cl-CON_CH2CH3_2 | -786.74799   | -785.09457   | -785.58085       | -785.19965       | 0.01052                | 0.14863                       | -0.22591              | 0.00000                 | 404.12330         | -785.75271           |
| n.Cl-COOCH3       | -688.66391   | -687.43091   | -687.77982       | -687.48349       | 0.00639                | 0.05225                       | -0.14120              | 0.00000                 | 314.78870         | -687.91495           |
| n.Cl-COOCH2CH3    | -727.98371   | -726.60223   | -727.00238       | -726.67096       | 0.00768                | 0.08017                       | -0.16943              | 0.00000                 | 346.46440         | -727.15270           |
| n.Cl-COOC_CH3_3   | -806.61708   | -804.94535   | -805.44828       | -805.04539       | 0.01028                | 0.13484                       | -0.22591              | 0.00000                 | 392.40480         | -805.62910           |
| n.Cl-F            | -559.94270   | -559.12695   | -559.33555       | -559.14995       | 0.00339                | 0.00175                       | -0.06589              | 0.00000                 | 217.92990         | -559.41930           |
| n.Cl-Cl           | -920.34988   | -919.17116   | -919.36645       | -919.20563       | 0.00351                | 0.00116                       | -0.06589              | 0.00000                 | 223.33360         | -919.46214           |
| n.Cl-Br           | -3034.05328  | -3031.94557  | -3032.46687      | -3031.83151      | 0.00359                | 0.00095                       | -0.06589              | 0.00000                 | 240.14860         | -3032.41415          |
| n.Cl-OH           | -535.94355   | -535.15678   | -535.34786       | -535.18353       | 0.00389                | 0.01278                       | -0.06589              | 0.00000                 | 236.71580         | -535.42383           |
| n.Cl-OCH3         | -575.25537   | -574.31502   | -574.55152       | -574.35872       | 0.00481                | 0.04129                       | -0.09413              | 0.00000                 | 270.91090         | -574.64326           |
| n.Cl-OCH2CH3      | -614.57534   | -613.48713   | -613.77499       | -613.54659       | 0.00612                | 0.06934                       | -0.12237              | 0.00000                 | 302.98710         | -613.88136           |
| n.Cl-OCHO         | -649.28433   | -648.19836   | -648.49349       | -648.23823       | 0.00495                | 0.02313                       | -0.11296              | 0.00000                 | 282.52430         | -648.61823           |

| mol              | B3LYP/6-31G* | ROMP2/6-31G* | ROMP2/GTMP2Large | URCCSD(T)/6-31G* | Temperature Correction | Zero Point Vibrational Energy | High Level Correction | Spin Orbital Correction | Entropy (J/mol K) | G3(MP2)-RAD Enthalpy |
|------------------|--------------|--------------|------------------|------------------|------------------------|-------------------------------|-----------------------|-------------------------|-------------------|----------------------|
| n.Cl-OCOCH3      | -688.61081   | -687.37652   | -687.72324       | -687.43210       | 0.00672                | 0.05045                       | -0.14120              | 0.00000                 | 328.20270         | -687.86284           |
| n.Cl-NH2         | -516.10346   | -515.33730   | -515.50992       | -515.36995       | 0.00394                | 0.02593                       | -0.06589              | 0.00000                 | 240.89050         | -515.57859           |
| n.Cl-NO2         | -665.26127   | -664.16276   | -664.46923       | -664.18989       | 0.00464                | 0.01211                       | -0.11296              | 0.00000                 | 272.20160         | -664.59257           |
| n.Cl-NHCH3       | -555.41503   | -554.49799   | -554.71918       | -554.54683       | 0.00488                | 0.05411                       | -0.09413              | 0.00000                 | 272.50280         | -554.80316           |
| n.Cl-N_CH3_2     | -594.72712   | -593.66175   | -593.93240       | -593.72639       | 0.00602                | 0.08157                       | -0.12237              | 0.00000                 | 298.52820         | -594.03181           |
| n.Cl-NHCHO       | -629.43627   | -628.37203   | -628.65448       | -628.41630       | 0.00532                | 0.03530                       | -0.11296              | 0.00000                 | 288.66340         | -628.77109           |
| n.Cl-NHCOCH3     | -668.76029   | -667.54786   | -667.88207       | -667.60799       | 0.00696                | 0.06285                       | -0.14120              | 0.00000                 | 328.21730         | -668.01358           |
| n.Cl-SH          | -858.96602   | -857.79628   | -857.99219       | -857.83463       | 0.00405                | 0.00913                       | -0.06589              | 0.00000                 | 251.32370         | -858.08324           |
| n.Cl-SCH3        | -898.28769   | -896.96985   | -897.21441       | -897.02333       | 0.00529                | 0.03879                       | -0.09413              | 0.00000                 | 288.47380         | -897.31793           |
| n.Cl-SCH2Ph      | -1129.33799  | -1127.27223  | -1127.75358      | -1127.38895      | 0.00950                | 0.11895                       | -0.22591              | 0.00000                 | 398.18130         | -1127.96777          |
| n.Cl-SOCH3       | -973.47969   | -971.98079   | -972.32648       | -972.03444       | 0.00621                | 0.04246                       | -0.12237              | 0.00000                 | 309.34250         | -972.45383           |
| n.Cl-SO2CH3      | -1048.68068  | -1047.01129  | -1047.45901      | -1047.06199      | 0.00675                | 0.04791                       | -0.15061              | 0.00000                 | 321.52330         | -1047.60565          |
| n.Cl-BH2         | -486.26958   | -485.55547   | -485.68250       | -485.58700       | 0.00396                | 0.02094                       | -0.05648              | 0.00000                 | 234.29550         | -485.74561           |
| n.Cl-PH2         | -802.75438   | -801.59632   | -801.78332       | -801.63667       | 0.00416                | 0.01821                       | -0.06589              | 0.00000                 | 256.24520         | -801.86721           |
| n.Cl-SiH3        | -751.53106   | -750.38895   | -750.56709       | -750.42557       | 0.00437                | 0.02589                       | -0.06589              | 0.00000                 | 250.73830         | -750.63935           |
| n.CH2Cl-CH=CH2   | -577.49943   | -576.48106   | -576.72282       | -576.54495       | 0.00568                | 0.07034                       | -0.11296              | 0.00000                 | 295.72360         | -576.82364           |
| n.CH2Cl-CH_CH2_2 | -616.80812   | -615.64705   | -615.93790       | -615.72206       | 0.00641                | 0.09975                       | -0.14120              | 0.00000                 | 314.83860         | -616.04794           |
| n.CH2Cl-CCH      | -576.24109   | -575.26256   | -575.48539       | -575.31616       | 0.00555                | 0.04652                       | -0.10354              | 0.00000                 | 290.99630         | -575.59047           |
| n.CH2Cl-CN       | -592.33654   | -591.35252   | -591.57892       | -591.39943       | 0.00516                | 0.03651                       | -0.10354              | 0.00000                 | 285.62770         | -591.68770           |
| n.CH2Cl-Ph       | -731.16024   | -729.65583   | -730.04687       | -729.75502       | 0.00787                | 0.11780                       | -0.19767              | 0.00000                 | 356.91850         | -730.21806           |
| n.CH2Cl-NH2      | -555.46175   | -554.54520   | -554.76926       | -554.59108       | 0.00481                | 0.05545                       | -0.09413              | 0.00000                 | 271.73660         | -554.84901           |
| n.CH2Cl-N_CH3_2  | -634.08232   | -632.86641   | -633.18935       | -632.94463       | 0.00747                | 0.11069                       | -0.15061              | 0.00000                 | 332.14610         | -633.30001           |
| n.CH2Cl-Br       | -3073.38223  | -3071.13200  | -3071.70290      | -3071.03001      | 0.00467                | 0.02842                       | -0.09413              | 0.00000                 | 287.81790         | -3071.66195          |
| n.CH2Cl-SH       | -898.28464   | -896.97236   | -897.21461       | -897.02486       | 0.00534                | 0.03695                       | -0.09413              | 0.00000                 | 291.29960         | -897.31894           |

| mol                     | B3LYP/6-31G* | ROMP2/6-31G* | ROMP2/GTMP2Large | URCCSD(T)/6-31G* | Temperature Correction | Zero Point Vibrational Energy | High Level Correction | Spin Orbital Correction | Entropy (J/mol K) | G3(MP2)-RAD Enthalpy |
|-------------------------|--------------|--------------|------------------|------------------|------------------------|-------------------------------|-----------------------|-------------------------|-------------------|----------------------|
| n.CH2Cl-SCH3            | -937.60123   | -936.14195   | -936.43249       | -936.20966       | 0.00674                | 0.06636                       | -0.12237              | 0.00000                 | 326.19420         | -936.54948           |
| n.CH2Cl-NO2             | -704.59422   | -703.35027   | -703.71084       | -703.39516       | 0.00590                | 0.04062                       | -0.14120              | 0.00000                 | 311.35860         | -703.85040           |
| n.CH2Cl-SiH3            | -790.79867   | -789.50579   | -789.73400       | -789.56058       | 0.00585                | 0.05236                       | -0.09413              | 0.00000                 | 297.82070         | -789.82471           |
| n.CH2Cl-COOH            | -688.66732   | -687.43831   | -687.79199       | -687.49089       | 0.00620                | 0.05240                       | -0.14120              | 0.00000                 | 316.28250         | -687.92716           |
| n.CH2Cl-COCH3           | -652.74368   | -651.54574   | -651.86444       | -651.61145       | 0.00710                | 0.07412                       | -0.14120              | 0.00000                 | 336.85520         | -651.99012           |
| n.CH2Cl-OCHO            | -688.65323   | -687.42037   | -687.76967       | -687.47424       | 0.00635                | 0.05239                       | -0.14120              | 0.00000                 | 330.49780         | -687.90600           |
| n.CH2Cl-OCOCH3          | -727.97998   | -726.59820   | -726.99910       | -726.66817       | 0.00805                | 0.07960                       | -0.16943              | 0.00000                 | 371.43470         | -727.15086           |
| n.CH2Cl-CONH2           | -668.80536   | -667.59477   | -667.93245       | -667.65309       | 0.00670                | 0.06432                       | -0.14120              | 0.00000                 | 323.68350         | -668.06094           |
| n.CH2Cl-SOCH3           | -1012.78849  | -1011.14379  | -1011.51870      | -1011.21751      | 0.00767                | 0.07063                       | -0.15061              | 0.00000                 | 348.61110         | -1011.66473          |
| n.CH2Cl-SO2CH3          | -1087.98132  | -1086.16835  | -1086.66263      | -1086.23670      | 0.00817                | 0.07531                       | -0.17885              | 0.00000                 | 356.63700         | -1086.82634          |
| n.CH3-CH3               | -79.83042    | -79.49469    | -79.61745        | -79.53449        | 0.00441                | 0.07378                       | -0.06589              | 0.00000                 | 227.44080         | -79.64495            |
| n.CH2CH3-CH2CH3         | -158.45804   | -157.82588   | -158.05211       | -157.89803       | 0.00671                | 0.13024                       | -0.12237              | 0.00000                 | 299.75110         | -158.10967           |
| n.CH-CH3-2-CH-CH3-2     | -237.08251   | -236.15892   | -236.49036       | -236.26262       | 0.00921                | 0.18582                       | -0.17885              | 0.00000                 | 354.62550         | -236.57788           |
| n.CH-CH2-2-CH-CH2-2     | -234.59323   | -233.73965   | -234.03133       | -233.82693       | 0.00707                | 0.14176                       | -0.16002              | 0.00000                 | 317.98050         | -234.12980           |
| n.C-CH3-3-C-CH3-3       | -315.70136   | -314.49187   | -314.93013       | -314.62611       | 0.01144                | 0.24129                       | -0.23533              | 0.00000                 | 386.11440         | -315.04697           |
| n.CH=CH2-CH=CH2         | -155.99214   | -155.42260   | -155.61408       | -155.48697       | 0.00559                | 0.08382                       | -0.10354              | 0.00000                 | 276.29900         | -155.69258           |
| n.CH=CHCH3-CH=CHCH3     | -234.63203   | -233.76475   | -234.05826       | -233.85973       | 0.00855                | 0.13932                       | -0.16002              | 0.00000                 | 343.19900         | -234.16540           |
| n.CH=C-CH3-2-CH=C-CH3-2 | -313.26566   | -312.10436   | -312.50217       | -312.22949       | 0.01146                | 0.19477                       | -0.21650              | 0.00000                 | 407.87400         | -312.63757           |
| n.Ph-Ph                 | -463.30607   | -461.76885   | -462.25954       | -461.90285       | 0.00982                | 0.17843                       | -0.27298              | 0.00000                 | 379.05810         | -462.47826           |
| n.CCH-CCH               | -153.48164   | -152.99222   | -153.14581       | -153.03456       | 0.00512                | 0.03736                       | -0.08472              | 0.00000                 | 244.06510         | -153.23039           |
| n.CN-CN                 | -185.65461   | -185.15555   | -185.31699       | -185.18410       | 0.00468                | 0.01619                       | -0.08472              | 0.00000                 | 239.38980         | -185.40938           |
| n.CH2OH-CH2OH           | -230.23572   | -229.53753   | -229.84015       | -229.58725       | 0.00635                | 0.08344                       | -0.12237              | 0.00000                 | 293.79440         | -229.92246           |
| n.CH2F-CH2F             | -278.27799   | -277.51785   | -277.85834       | -277.55971       | 0.00537                | 0.06041                       | -0.12237              | 0.00000                 | 280.22280         | -277.95679           |
| n.CH2Cl-CH2Cl           | -999.01901   | -997.55023   | -997.84127       | -997.61310       | 0.00585                | 0.05752                       | -0.12237              | 0.00000                 | 301.04150         | -997.96315           |

| mol                         | B3LYP/6-31G* | ROMP2/6-31G* | ROMP2/GTMP2Large | URCCSD(T)/6-31G* | Temperature Correction | Zero Point Vibrational Energy | High Level Correction | Spin Orbital Correction | Entropy (J/mol K) | G3(MP2)-RAD Enthalpy |
|-----------------------------|--------------|--------------|------------------|------------------|------------------------|-------------------------------|-----------------------|-------------------------|-------------------|----------------------|
| n.CHO-CHO                   | -227.81863   | -227.18828   | -227.43175       | -227.22594       | 0.00514                | 0.03645                       | -0.10354              | 0.00000                 | 270.72210         | -227.53137           |
| n.COCH3-COCH3               | -306.47602   | -305.54807   | -305.89403       | -305.61689       | 0.00813                | 0.09196                       | -0.16002              | 0.00000                 | 343.27220         | -306.02279           |
| n.COOH-COOH                 | -378.31344   | -377.32174   | -377.73819       | -377.36348       | 0.00650                | 0.04809                       | -0.16002              | 0.00000                 | 315.91820         | -377.88537           |
| n.COPh-COPh                 | -689.95296   | -687.81996   | -688.53210       | -687.88879       | 0.01372                | 0.19758                       | -0.36711              | 0.00000                 | 478.19130         | -688.75674           |
| n.CONH2-CONH2               | -338.60130   | -337.65025   | -338.03130       | -337.70311       | 0.00715                | 0.07234                       | -0.16002              | 0.00000                 | 317.88560         | -338.16468           |
| n.CONHCH3-CONHCH3           | -417.22645   | -415.97453   | -416.45213       | -416.06031       | 0.01018                | 0.12862                       | -0.21650              | 0.00000                 | 389.10300         | -416.61561           |
| n.CON_CH3_2-CON_CH3_2       | -495.82668   | -494.27891   | -494.85627       | -494.39731       | 0.01333                | 0.18316                       | -0.27298              | 0.00000                 | 455.06910         | -495.05116           |
| n.CON_CH2CH3_2-CON_CH2CH3_2 | -653.09093   | -650.95760   | -651.74113       | -651.13983       | 0.01802                | 0.29622                       | -0.38593              | 0.00000                 | 560.70330         | -651.99505           |
| n.COOCH3-COOCH3             | -456.92956   | -455.63312   | -456.14304       | -455.70920       | 0.00986                | 0.10344                       | -0.21650              | 0.00000                 | 389.33170         | -456.32232           |
| n.COOCH2CH3-COOCH2CH3       | -535.56819   | -533.97509   | -534.58755       | -534.08358       | 0.01245                | 0.15925                       | -0.27298              | 0.00000                 | 451.89730         | -534.79732           |
| n.COOC_CH3_3-COOC_CH3_3     | -692.83212   | -690.65963   | -691.47756       | -690.83116       | 0.01772                | 0.26862                       | -0.38593              | 0.00000                 | 545.37670         | -691.74868           |
| n.F-F                       | -199.49825   | -199.03468   | -199.26020       | -199.05049       | 0.00333                | 0.00238                       | -0.06589              | 0.00000                 | 202.17180         | -199.33619           |
| n.Cl-Cl                     | -920.34988   | -919.17116   | -919.36645       | -919.20563       | 0.00351                | 0.00116                       | -0.06589              | 0.00000                 | 223.33360         | -919.46214           |
| n.Br-Br                     | -5147.75475  | -5144.71907  | -5145.56616      | -5144.45592      | 0.00370                | 0.00071                       | -0.06589              | 0.00000                 | 245.40450         | -5145.36448          |
| n.OH-OH                     | -151.53321   | -151.13003   | -151.32273       | -151.15107       | 0.00420                | 0.02574                       | -0.06589              | 0.00000                 | 227.90640         | -151.37973           |
| n.OCH3-OCH3                 | -230.16112   | -229.45056   | -229.73432       | -229.50555       | 0.00646                | 0.08192                       | -0.12237              | 0.00000                 | 304.74600         | -229.82328           |
| n.OCH2CH3-OCH2CH3           | -308.79922   | -307.79246   | -308.17892       | -307.87940       | 0.00902                | 0.13810                       | -0.17885              | 0.00000                 | 362.55180         | -308.29760           |
| n.OCHO-OCHO                 | -378.21400   | -377.21236   | -377.61555       | -377.26068       | 0.00665                | 0.04581                       | -0.16002              | 0.00000                 | 314.86290         | -377.77142           |
| n.OCOCH3-OCOCH3             | -456.86912   | -455.57041   | -456.07675       | -455.65046       | 0.01006                | 0.10056                       | -0.21650              | 0.00000                 | 392.89780         | -456.26267           |
| n.NH2-NH2                   | -111.85645   | -111.49786   | -111.65556       | -111.52866       | 0.00420                | 0.05245                       | -0.06589              | 0.00000                 | 230.33230         | -111.69559           |
| n.NO2-NO2                   | -410.16824   | -409.15266   | -409.58124       | -409.16804       | 0.00626                | 0.02305                       | -0.16002              | 0.00000                 | 301.25970         | -409.72733           |
| n.NHCH3-NHCH3               | -190.47601   | -189.81657   | -190.07027       | -189.88072       | 0.00648                | 0.10818                       | -0.12237              | 0.00000                 | 303.77400         | -190.14213           |
| n.N_CH3_2-N_CH3_2           | -269.09044   | -268.13650   | -268.49197       | -268.23227       | 0.00867                | 0.16357                       | -0.17885              | 0.00000                 | 348.72950         | -268.59435           |
| n.NHCHO-NHCHO               | -338.54074   | -337.58533   | -337.96107       | -337.64173       | 0.00720                | 0.07161                       | -0.16002              | 0.00000                 | 325.66330         | -338.09869           |



| mol                        | B3LYP/6-31G* | ROMP2/6-31G* | ROMP2/GTMP2Large | URCCSD(T)/6-31G* | Temperature Correction | Zero Point Vibrational Energy | High Level Correction | Spin Orbital Correction | Entropy (J/mol K) | G3(MP2)-RAD Enthalpy |
|----------------------------|--------------|--------------|------------------|------------------|------------------------|-------------------------------|-----------------------|-------------------------|-------------------|----------------------|
| n.NHCOCH3-NHCOCH3          | -417.19087   | -415.93921   | -416.41803       | -416.02783       | 0.01047                | 0.12652                       | -0.21650              | 0.00000                 | 400.51180         | -416.58617           |
| n.SH-SH                    | -797.57178   | -796.41099   | -796.60666       | -796.45372       | 0.00438                | 0.01791                       | -0.06589              | 0.00000                 | 252.25270         | -796.69299           |
| n.SCH3-SCH3                | -876.20751   | -874.75241   | -875.04572       | -874.82530       | 0.00746                | 0.07643                       | -0.12237              | 0.00000                 | 328.74400         | -875.15709           |
| n.SCH2Ph-SCH2Ph            | -1338.30976  | -1335.36322  | -1336.13075      | -1335.43611      | 0.01588                | 0.23695                       | -0.38593              | 0.00000                 | 541.35810         | -1336.33675          |
| n.SOCH3-SOCH3              | -1026.55785  | -1024.73751  | -1025.23191      | -1024.81588      | 0.00964                | 0.08292                       | -0.17885              | 0.00000                 | 384.22590         | -1025.39656          |
| n.SO2CH3-SO2CH3            | -1176.96114  | -1174.79731  | -1175.49242      | -1174.86943      | 0.01102                | 0.09321                       | -0.23533              | 0.00000                 | 408.31260         | -1175.69563          |
| n.BH2-BH2                  | -52.04446    | -51.77724    | -51.84792        | -51.81381        | 0.00474                | 0.03816                       | -0.04707              | 0.00000                 | 231.15870         | -51.88865            |
| n.PH2-PH2                  | -685.09493   | -683.95326   | -684.13016       | -684.00371       | 0.00521                | 0.03461                       | -0.06589              | 0.00000                 | 272.43680         | -684.20668           |
| n.SiH3-SiH3                | -582.58273   | -581.46466   | -581.62218       | -581.51322       | 0.00597                | 0.04832                       | -0.06589              | 0.00000                 | 273.36920         | -581.68233           |
| n.CH=CH2-H2CCH2-CH=CH2     | -234.60965   | -233.74565   | -234.04175       | -233.84269       | 0.00812                | 0.13993                       | -0.16002              | 0.00000                 | 338.35310         | -234.15076           |
| n.CH_CH2_2-H2CCH2-CH_CH2_2 | -313.22135   | -312.07275   | -312.46762       | -312.19225       | 0.00966                | 0.19805                       | -0.21650              | 0.00000                 | 385.07920         | -312.59591           |
| n.CCH-H2CCH2-CCH           | -232.10310   | -231.31921   | -231.57826       | -231.39533       | 0.00782                | 0.09248                       | -0.14120              | 0.00000                 | 329.31100         | -231.69527           |
| n.CN-H2CCH2-CN             | -264.30139   | -263.50539   | -263.77112       | -263.56803       | 0.00711                | 0.07244                       | -0.14120              | 0.00000                 | 320.49070         | -263.89540           |
| n.Ph-H2CCH2-Ph             | -541.93036   | -540.09693   | -540.69200       | -540.26402       | 0.01266                | 0.23432                       | -0.32946              | 0.00000                 | 462.76440         | -540.94156           |
| n.NH2-H2CCH2-NH2           | -190.51110   | -189.85628   | -190.11800       | -189.91827       | 0.00641                | 0.10900                       | -0.12237              | 0.00000                 | 293.73310         | -190.18695           |
| n.N_CH3_2-H2CCH2-N_CH3_2   | -347.74148   | -346.49019   | -346.94713       | -346.61694       | 0.01155                | 0.21937                       | -0.23533              | 0.00000                 | 410.77920         | -347.07829           |
| n.Br-H2CCH2-Br             | -5226.39297  | -5223.06566  | -5224.01693      | -5222.83044      | 0.00622                | 0.05621                       | -0.12237              | 0.00000                 | 324.46070         | -5223.84164          |
| n.SH-H2CCH2-SH             | -876.19333   | -874.74248   | -875.03593       | -874.81590       | 0.00738                | 0.07352                       | -0.12237              | 0.00000                 | 328.96290         | -875.15082           |
| n.SCH3-H2CCH2-SCH3         | -954.82472   | -953.07994   | -953.47080       | -953.18392       | 0.01028                | 0.13216                       | -0.17885              | 0.00000                 | 399.61320         | -953.61119           |
| n.NO2-H2CCH2-NO2           | -488.81719   | -487.50039   | -488.03220       | -487.56045       | 0.00871                | 0.08065                       | -0.21650              | 0.00000                 | 381.01270         | -488.21939           |
| n.SiH3-H2CCH2-SiH3         | -661.21144   | -659.79969   | -660.06747       | -659.87773       | 0.00852                | 0.10352                       | -0.12237              | 0.00000                 | 346.40110         | -660.15584           |
| n.COOH-H2CCH2-COOH         | -456.96216   | -455.67485   | -456.19565       | -455.74970       | 0.00933                | 0.10404                       | -0.21650              | 0.00000                 | 398.95100         | -456.37364           |
| n.COCH3-H2CCH2-COCH3       | -385.11137   | -383.88709   | -384.33717       | -383.98825       | 0.01094                | 0.14755                       | -0.21650              | 0.00000                 | 417.80280         | -384.49633           |
| n.OCHO-H2CCH2-OCHO         | -456.92863   | -455.63422   | -456.14414       | -455.71173       | 0.00938                | 0.10429                       | -0.21650              | 0.00000                 | 385.59310         | -456.32447           |

| mol                    | B3LYP/6-31G* | ROMP2/6-31G* | ROMP2/GTMP2Large | URCCSD(T)/6-31G* | Temperature Correction | Zero Point Vibrational Energy | High Level Correction | Spin Orbital Correction | Entropy (J/mol K) | G3(MP2)-RAD Enthalpy |
|------------------------|--------------|--------------|------------------|------------------|------------------------|-------------------------------|-----------------------|-------------------------|-------------------|----------------------|
| n.OCOCH3-H2CCH2-OCOCH3 | -535.58037   | -533.98836   | -534.60147       | -534.09813       | 0.01287                | 0.15859                       | -0.27298              | 0.00000                 | 467.13630         | -534.81276           |
| n.CONH2-H2CCH2-CONH2   | -417.22535   | -415.97828   | -416.46429       | -416.06468       | 0.01021                | 0.12769                       | -0.21650              | 0.00000                 | 395.64010         | -416.62928           |
| n.SOCH3-H2CCH2-SOCH3   | -1105.19840  | -1103.08543  | -1103.64302      | -1103.20172      | 0.01218                | 0.14077                       | -0.23533              | 0.00000                 | 449.47340         | -1103.84167          |
| n.SO2CH3-H2CCH2-SO2CH3 | -1255.60018  | -1253.14761  | -1253.94522      | -1253.25368      | 0.01315                | 0.15027                       | -0.29180              | 0.00000                 | 459.77160         | -1254.17967          |
| r.COPh ONIOM           | -344.92063   | -343.84871   | -344.20356       | -343.88389       | 0.00728                | 0.09588                       | -0.18282              | 0.00000                 | 339.20830         | -344.31841           |
| r.SCH2Ph ONIOM         | -669.10963   | -667.63195   | -668.00594       | -667.67013       | 0.00807                | 0.11601                       | -0.19223              | 0.00000                 | 368.62310         | -668.11227           |

## Table S4 B3-LYP/6-31G(d) Optimized Geometries of All Species

r.H  
1\1\GINC-LC127\FOpt\UB3LYP\Gen\H1(2)\CYL509\18-Jun-2008\0\#\B3LYP/GEN  
6D INT(GRID=ULTRAFINE) OPT FREQ=NORAMAN MAXDISK=1342177280\r.H.freq\  
0,2\H,-0.001,0.,0.\Version=IA32L-G03RevC.02\State=2-A1\HF=-0.5002728  
\S2=0.75\S2-1=0.\S2A=0.75\RMSD=8.343e-12\RMSF=0.000e+00\Dipole=0.,0.,0  
.\PG=OH [O(H1)]\@

r.BH2  
1\1\GINC-LC72\FOpt\UB3LYP\Gen\B1H2(2)\CYL509\18-Jun-2008\0\#\B3LYP/GEN  
6D INT(GRID=ULTRAFINE) OPT FREQ=NORAMAN MAXDISK=1342177280\r.BH2.fre  
q\0,2\B,0.0493936865,0.0434439027,0.1345738972\H,0.8573047997,-0.4630  
297747,-0.5820039413\H,-1.1042732321,0.2458102613,-0.0908655445\Versi  
on=IA32L-G03RevC.02\State=2-A'\HF=-25.9347113\S2=0.750873\S2-1=0.\S2A=  
0.75\RMSD=3.990e-09\RMSF=2.360e-05\Dipole=-0.0477883,-0.0420326,-0.130  
2018\PG=CS [SG(B1H2)]\@

r.CH3  
1\1\GINC-LC127\FOpt\UB3LYP\Gen\C1H3(2)\CYL509\18-Jun-2008\0\#\B3LYP/GE  
N 6D INT(GRID=ULTRAFINE) OPT FREQ=NORAMAN MAXDISK=1342177280\r.CH3.fr  
eq\0,2\C,-0.0001249111,0.0000332268,-0.000028932\H,0.7849181686,0.644  
7974652,-0.3753921373\H,0.1534759631,-0.5641961968,0.911541984\H,-0.93  
76446653,-0.0808006292,-0.5359762544\Version=IA32L-G03RevC.02\State=2  
-A\HF=-39.8382917\S2=0.753767\S2-1=0.\S2A=0.750007\RMSD=3.352e-09\RMSF  
=1.010e-04\Dipole=0.0001085,-0.0001092,-0.0000499\PG=C01 [X(C1H3)]\@

r.NH2  
1\1\GINC-LC127\FOpt\UB3LYP\Gen\H2N1(2)\CYL509\18-Jun-2008\0\#\B3LYP/GE  
N 6D INT(GRID=ULTRAFINE) OPT FREQ=NORAMAN MAXDISK=1342177280\r.NH2.fr  
eq\0,2\N,0.0888723112,-0.0801519968,0.0808448842\H,-0.9433242776,-0.1  
123523509,0.0225778534\H,0.3212180989,0.6734163287,-0.5884920426\Vers  
ion=IA32L-G03RevC.02\State=2-B1\HF=-55.8726204\S2=0.752803\S2-1=0.\S2A  
=0.750004\RMSD=2.062e-09\RMSF=2.185e-05\Dipole=-0.4871377,0.4393389,-0  
.4431368\PG=C02V [C2(N1),SGV(H2)]\@

r.OH  
1\1\GINC-LC127\FOpt\UB3LYP\Gen\H1O1(2)\CYL509\18-Jun-2008\0\#\B3LYP/GE  
N 6D INT(GRID=ULTRAFINE) OPT FREQ=NORAMAN MAXDISK=1342177280\r.OH.fre  
q\0,2\O,-0.050878519,-0.0905506976,-0.0337549811\H,0.4070281516,0.724  
4055807,0.2700398489\Version=IA32L-G03RevC.02\HF=-75.7234538\S2=0.751  
967\S2-1=0.\S2A=0.750002\RMSD=2.933e-09\RMSF=1.982e-07\Dipole=0.322109  
5,0.5732722,0.2137012\PG=C\*V [C\*(H1O1)]\@

r.F  
1\1\GINC-LC127\FOpt\UB3LYP\Gen\F1(2)\CYL509\18-Jun-2008\0\#\B3LYP/GEN  
6D INT(GRID=ULTRAFINE) OPT FREQ=NORAMAN MAXDISK=1342177280\r.F.freq\  
0,2\F,0.400808,0.577206,0.269857\Version=IA32L-G03RevC.02\HF=-99.7155  
355\S2=0.750978\S2-1=0.\S2A=0.75\RMSD=2.800e-09\RMSF=0.000e+00\Dipole=  
0.,0.,0.\PG=OH [O(F1)]\@

r.SiH3  
1\1\GINC-LC127\FOpt\UB3LYP\Gen\H3Si1(2)\CYL509\18-Jun-2008\0\#\B3LYP/GE  
N 6D INT(GRID=ULTRAFINE) OPT FREQ=NORAMAN MAXDISK=1342177280\r.SiH3.f  
req\0,2\Si,0.0383639103,-0.0664481773,-0.0271383241\H,-1.3588970721,-  
0.0984536663,-0.5407000742\H,0.0571193176,-0.0988848971,1.4613765601\H  
0.7646830105,1.127613045,-0.5407399492\Version=IA32L-G03RevC.02\Stat  
e=2-A\HF=-291.232263\S2=0.751364\S2-1=0.\S2A=0.750001\RMSD=3.603e-09\R  
MSF=1.375e-05\Dipole=0.0077902,-0.0134929,-0.0054515\PG=C01 [X(H3Si1)]  
\@

r.PH2  
1\1\GINC-LC16\FOpt\UB3LYP\Gen\H2P1(2)\CYL509\18-Jun-2008\0\#\B3LYP/GEN  
6D INT(GRID=ULTRAFINE) OPT FREQ=NORAMAN MAXDISK=1342177280\r.PH2.fre  
q\0,2\P,0.0343870474,0.01354731,0.1113374407\H,-1.0499535111,-0.67268  
40638,-0.5209148094\H,0.5341477995,0.4694744141,-1.1491468017\Version  
=IA32L-G03RevC.02\State=2-A'\HF=-342.5042163\S2=0.753627\S2-1=0.\S2A=0  
.750005\RMSD=9.038e-09\RMSF=1.202e-05\Dipole=-0.1003871,-0.0395491,-0.  
3250307\PG=CS [SG(H2P1)]\@

r.SH  
1\1\GINC-LC59\FOpt\UB3LYP\Gen\H1S1(2)\CYL509\18-Jun-2008\0\#\B3LYP/GEN  
6D INT(GRID=ULTRAFINE) OPT FREQ=NORAMAN MAXDISK=1342177280\r.SH.freq\  
0,2\S,-0.0393355621,0.0689744181,0.0071146406\H,0.6293689937,-1.1035  
906894,-0.1138342498\Version=IA32L-G03RevC.02\HF=-398.7400218\S2=0.75

```

2432\S2-1=0.\S2A=0.750002\RMSD=3.287e-09\RMSF=5.241e-05\Dipole=0.20576
31,-0.3608031,-0.0372165\PG=C*V [C*(H1S1)]\@

r.Cl
1\1\GINC-LC51\FOpt\UB3LYP\Gen\C11(2)\CYL509\19-Jun-2008\0\#B3LYP/GEN
6D INT(GRID=ULTRAFINE) OPT FREQ=NORAMAN MAXDISK=1342177280\r.Cl.freq
\0,2\C1,1.274,0.,0.\Version=IA32L-G03RevC.02\HF=-460.1362423\S2=0.751
721\S2-1=0.\S2A=0.750001\RMSD=7.828e-10\RMSF=0.000e+00\Dipole=0.,0.,0.
\PG=OH [O(C11)]\@

r.Br
1\1\GINC-LC76\FOpt\UB3LYP\Gen\Br1(2)\CYL509\18-Jun-2008\0\#B3LYP/GEN
6D INT(GRID=ULTRAFINE) OPT FREQ=NORAMAN MAXDISK=1342177280\r.Br.freq
\0,2\Br,0.227076,0.324848,0.153903\Version=IA32L-G03RevC.02\HF=-2573.
8397406\S2=0.751467\S2-1=0.\S2A=0.75\RMSD=5.590e-09\RMSF=0.000e+00\Dip
ole=0.,0.,0.\PG=OH [O(Br1)]\@

r.N_CH3_2
1\1\GINC-LC76\FOpt\UB3LYP\Gen\C2H6N1(2)\CYL509\18-Jun-2008\0\#B3LYP/G
EN 6D INT(GRID=ULTRAFINE) OPT FREQ=NORAMAN MAXDISK=1342177280\r.N_CH3
_2.freq\0,2\C,0.8514615911,0.2358642064,0.8192677711\H,1.9402502567,0
.3435285235,0.8208846498\H,0.5755864521,-0.5630148677,1.5308482389\H,0
.4047418761,1.1668718705,1.2120138296\N,0.3786292823,-0.0542652751,-0.
5120166866\C,-1.055160241,-0.2069280693,-0.5437239237\H,-1.391214696,-
1.0206187859,0.1238402503\H,-1.3913430366,-0.4292190724,-1.5608882086\
H,-1.5662339292,0.7086924353,-0.1958450383\Version=IA32L-G03RevC.02\s
tate=2-A\HF=-134.5094891\S2=0.75361\S2-1=0.\S2A=0.75001\RMSD=5.980e-09
\RMSF=5.647e-05\Dipole=-0.4100606,0.0593468,0.554335\PG=C01 [X(C2H6N1)
]\@

r.NHCH3
1\1\GINC-LC151\FOpt\UB3LYP\Gen\C1H4N1(2)\CYL509\18-Jun-2008\0\#B3LYP/
GEN 6D INT(GRID=ULTRAFINE) OPT FREQ=NORAMAN MAXDISK=1342177280\r.NHCH
3.freq\0,2\N,0.8170000572,-0.0036460428,0.0775085711\C,-0.6240650919,
-0.0763279944,0.0105357862\H,-0.9978236155,-0.8646317389,0.6715040864\
H,-0.975525978,-0.2847577049,-1.015484086\H,-1.0954713631,0.8782858001
,0.3040260168\H,1.0942111077,0.7545939095,-0.5658207319\Version=IA32L
-G03RevC.02\State=2-A\HF=-95.1908608\S2=0.753275\S2-1=0.\S2A=0.750008\
RMSD=8.132e-10\RMSF=3.441e-05\Dipole=-0.5339046,0.4096999,-0.4097511\PG
=C01 [X(C1H4N1)]\@

r.NHCHO
1\1\GINC-LC12\FOpt\UB3LYP\Gen\C1H2N1O1(2)\CYL509\18-Jun-2008\0\#B3LYP
/GEN 6D INT(GRID=ULTRAFINE) OPT FREQ=NORAMAN MAXDISK=1342177280\r.NHC
HO.freq\0,2\N,-0.7135839196,-0.3901674214,0.8219894711\H,-1.711084485
2,-0.5801629906,0.6429000757\C,-0.150540372,0.0559181041,-0.3427285568
\O,1.0482583833,0.3533304829,-0.3862438881\H,-0.7766529121,0.149182452
8,-1.2505039278\Version=IA32L-G03RevC.02\State=2-A\HF=-169.2000091\S2
=0.778\S2-1=0.\S2A=0.750117\RMSD=2.890e-09\RMSF=6.916e-05\Dipole=-1.16
73332,-0.1574232,-0.451787\PG=C01 [X(C1H2N1O1)]\@

r.NHCOCH3
1\1\GINC-AC8\FOpt\UB3LYP\Gen\C2H4N1O1(2)\CYL509\19-Jun-2008\0\#B3LYP/
GEN 6D INT(GRID=ULTRAFINE) OPT FREQ=NORAMAN MAXDISK=2684354560\test.f
req\0,2\H,-1.6629109093,-1.1577580506,-0.353187704\C,-1.3934086206,-0.
174971035,0.0476696025\C,0.093647795,0.0446201244,-0.0521855925\O,0.6
055828432,1.1220416729,-0.3879364746\H,-1.6965547819,-0.1566160268,1.1
007507225\H,-1.9235501534,0.6111830158,-0.4933109812\N,0.9144579976,-
.9485609752,0.4153095735\H,1.8357120691,-0.8511100319,-0.0308313156\V
ersion=IA64L-G03RevC.02\State=2-A\HF=-208.5321137\S2=0.76798\S2-1=0.\S
2A=0.75007\RMSD=7.050e-09\RMSF=1.361e-05\Dipole=-0.3748795,-0.4604407,
-0.1892604\PG=C01 [X(C2H4N1O1)]\@

r.NO2
1\1\GINC-LC16\FOpt\UB3LYP\Gen\N1O2(2)\CYL509\18-Jun-2008\0\#B3LYP/GEN
6D INT(GRID=ULTRAFINE) OPT FREQ=NORAMAN MAXDISK=1342177280\r.NO2.fre
q\0,2\N,0.1376665018,-0.2430965251,-0.1721682798\O,0.9348648835,0.569
9789982,0.2163813033\O,-1.0553230726,-0.3572695388,-0.0657340585\Vers
ion=IA32L-G03RevC.02\State=2-A1\HF=-205.0722069\S2=0.753298\S2-1=0.\S2
A=0.750007\RMSD=2.786e-09\RMSF=1.544e-05\Dipole=0.0530556,-0.0936875,-
0.0663523\PG=C02V [C2(N1),SGV(O2)]\@

r.OCF3
1\1\GINC-LC44\FOpt\UB3LYP\Gen\C1F3O1(2)\CYL509\18-Jun-2008\0\#B3LYP/G
EN 6D INT(GRID=ULTRAFINE) OPT FREQ=NORAMAN MAXDISK=1342177280\r.OCF3.
freq\0,2\O,-1.0374085479,0.5593487278,-0.7408641945\C,-0.0241929362,0
.0013112985,-0.0320561289\F,1.1325954914,0.012590764,-0.7038680751\F,-

```

0.2815298353,-1.2658318007,0.3110825532\F,0.0872038996,0.7551679686,1.0727022252\\Version=IA32L-G03RevC.02\State=2-A\HF=-412.7726789\S2=0.752399\S2-1=0.\S2A=0.750004\RMSD=4.446e-09\RMSF=6.922e-05\Dipole=0.0375027,-0.0183365,0.0291574\PG=C01 [X(C1F3O1)]\\@

r.OCH2CH3

1\1\GINC-AC29\FOpt\UB3LYP\Gen\C2H5O1(2)\CYL509\19-Jun-2008\0\#B3LYP/GEN 6D INT (GRID=ULTRAFINE) OPT FREQ=NORAMAN MAXDISK=1342177280\\r.OCH2CH3.freq\0,2\O,-0.5815105059,-0.0040949456,-1.1730345777\C,-0.4774349713,-0.0080315087,0.1938198643\C,0.9491299715,0.0185764459,0.742601877\H,-1.0115280091,-0.9252062308,0.5244523317\H,-1.0955854549,0.8133829117,0.6081376667\H,0.9490069881,-0.020837353,1.8382807649\H,1.4594893433,0.9365308909,0.4324661902\H,1.5205311786,-0.8343802774,0.3624092202\\Version=IA64L-G03RevC.02\State=2-A\HF=-154.3704938\S2=0.753018\S2-1=0.\S2A=0.750007\RMSD=3.836e-09\RMSF=1.443e-05\Dipole=0.051118,-0.0331855,0.7711156\PG=C01 [X(C2H5O1)]\\@

r.OCH3

1\1\GINC-LC72\FOpt\UB3LYP\Gen\C1H3O1(2)\CYL509\18-Jun-2008\0\#B3LYP/GEN 6D INT (GRID=ULTRAFINE) OPT FREQ=NORAMAN MAXDISK=1342177280\\r.OCH3.freq\0,2\O,-0.7401800878,0.0044987004,-0.2863968812\C,0.5430046856,-0.0032913313,0.189874558\H,1.1047886642,-0.9156166856,-0.0725006565\H,0.4431127973,-0.0032134174,1.296084607\H,1.1155111269,0.9025884872,-0.0716562485\\Version=IA32L-G03RevC.02\State=2-A\HF=-115.0504607\S2=0.752915\S2-1=0.\S2A=0.750006\RMSD=2.210e-09\RMSF=1.851e-04\Dipole=0.6931219,-0.0042534,0.3592879\PG=C01 [X(C1H3O1)]\\@

r.OCHO

1\1\GINC-LC76\FOpt\UB3LYP\Gen\C1H1O2(2)\CYL509\18-Jun-2008\0\#B3LYP/GEN 6D INT (GRID=ULTRAFINE) OPT FREQ=NORAMAN MAXDISK=1342177280\\r.OCHO.freq\0,2\O,-0.3555142374,-0.2619269769,-1.2474695946\C,-0.0975675853,-0.0106712683,-0.0383312764\C,1.2838487647,0.0217180176,0.5360060333\O,-1.1440722065,0.2376904663,0.621084662\H,1.2553563471,-0.2397765432,1.5973203364\H,1.6899845565,1.0350302623,0.4376936024\H,1.933663571,-0.6676421299,-0.009983019\\Version=IA64L-G03RevC.02\State=2-A\HF=-228.4113647\S2=0.755832\S2-1=0.\S2A=0.750019\RMSD=5.360e-09\RMSF=1.263e-04\Dipole=0.5505261,0.7128088,0.005349\PG=C01 [X(C1H1O2)]\\@

r.OCOCH3

1\1\GINC-AC8\FOpt\UB3LYP\Gen\C2H3O2(2)\CYL509\19-Jun-2008\0\#B3LYP/GEN 6D INT (GRID=ULTRAFINE) OPT FREQ=NORAMAN MAXDISK=1342177280\\r.OCOCH3.freq\0,2\O,-0.3555142374,-0.2619269769,-1.2474695946\C,-0.0975675853,-0.0106712683,-0.0383312764\C,1.2838487647,0.0217180176,0.5360060333\O,-1.1440722065,0.2376904663,0.621084662\H,1.2553563471,-0.2397765432,1.5973203364\H,1.6899845565,1.0350302623,0.4376936024\H,1.933663571,-0.6676421299,-0.009983019\\Version=IA64L-G03RevC.02\State=2-A\HF=-228.4113647\S2=0.755832\S2-1=0.\S2A=0.750018\RMSD=1.480e-09\RMSF=4.918e-06\Dipole=1.1430117,0.0403125,0.4716707\PG=C01 [X(C2H3O2)]\\@

r.Si\_CH3\_3

1\1\GINC-LC59\FOpt\UB3LYP\Gen\C3H9Si1(2)\CYL509\18-Jun-2008\0\#B3LYP/GEN 6D INT (GRID=ULTRAFINE) OPT FREQ=NORAMAN MAXDISK=1342177280\\r.Si\_CH3\_3.freq\0,2\H,0.9245956779,-1.601942021,-1.2760281951\C,0.9019510825,-1.5623059598,-0.1773961143\H,1.9380925215,-1.587126337,0.1780153873\H,0.4055908155,-2.4720205258,0.178364213\Si,0.0000075511,0.0000077486,0.4251456083\C,-1.8039882018,0.0000231856,-0.1773617565\C,0.9020235739,1.5622746977,-0.1774288428\H,-1.849667786,0.0001779706,-1.2759968359\H,-2.3436400594,0.8847545845,0.178365742\H,-2.34352033196,-0.8848864804,0.1781019868\H,1.9379377382,1.5874276323,0.1786136991\H,0.4052467373,2.4720057212,0.1777086195\H,0.9253432312,1.6015494339,-1.2760628518\\Version=IA32L-G03RevC.02\State=2-A\HF=-409.2109419\S2=0.751147\S2-1=0.\S2A=0.750001\RMSD=2.601e-09\RMSF=9.102e-05\Dipole=0.0000112,-0.0000133,-0.2627105\PG=C01 [X(C3H9Si1)]\\@

r.P\_CH3\_2

1\1\GINC-LC76\FOpt\UB3LYP\Gen\C2H6P1(2)\CYL509\18-Jun-2008\0\#B3LYP/GEN 6D INT (GRID=ULTRAFINE) OPT FREQ=NORAMAN MAXDISK=1342177280\\r.P\_CH3\_2.freq\0,2\C,-0.29648447,1.3709391052,0.539869766\H,0.3714549665,2.1500549861,0.9194063283\H,-1.0094727095,1.1112087426,1.3330016321\H,-0.8672404183,1.7854421443,-0.3011600439\O,0.7017807761,-0.1174276828,0.0125207179\C,-0.7075846044,-1.2029425107,-0.557754767\H,-0.3168272134,-2.1592512578,-0.9183025077\H,-1.2690138418,-0.7299394486,-1.3738251976\H,-1.4111979788,-1.4040794911,0.2603790258\\Version=IA32L-G03RevC.02\State=2-A\HF=-421.1466401\S2=0.753989\S2-1=0.\S2A=0.750006\RMSD=3.712e-09\RMSF=8.282e-06\Dipole=-0.6084818,0.1018271,-0.0108811\PG=C01 [X(C2H6P1)]\\@

r.SC\_CH3\_2CN

1\1\GINC-LC48\FOpt\UB3LYP\Gen\C4H6N1S1(2)\CYL509\19-Jun-2008\0\#B3LYP

/GEN 6D INT (GRID=ULTRAFINE) OPT FREQ=NORAMAN MAXDISK=1342177280\\r.SC  
CH3\_2CN.freq\\0,2\\S,1.6051906045,-0.3470482178,-0.2605504015\\C,-0.1911  
878503,-0.1757260052,0.1337985611\\C,-0.3631818145,-0.2565377242,1.6689  
015547\\C,-0.9580341427,-1.3211558788,-0.5678856709\\C,-0.6910103887,1.1  
220236604,-0.3508712694\\H,-0.0071131492,-1.2258554118,2.0280111935\\H,0  
.191455218,0.5376683047,2.1761382573\\H,-1.4242820797,-0.1482360937,1.9  
208843565\\H,-0.8265475341,-1.2849961005,-1.6528167836\\H,-2.0279719606,  
-1.2283914577,-0.3491939011\\H,-0.5989493353,-2.2848595187,-0.196907132  
4\\N,-1.1098793793,2.1394024926,-0.7229955171\\Version=IA32L-G03RevC.02  
\\State=2-A\\HF=-608.9213547\\S2=0.752708\\S2-1=0.\\S2A=0.750003\\RMSD=1.427  
e-09\\RMSF=1.554e-05\\Dipole=-0.1086183,-1.333372,0.6631612\\PG=C01 [X(C4  
H6N1S1)]\\@

r.SCH2COOCH3

1\\1\\GINC-LC96\\FOpt\\UB3LYP\\Gen\\C3H5O2S1(2)\\CYL509\\19-Jun-2008\\0\\#B3LYP  
/GEN 6D INT (GRID=ULTRAFINE) OPT FREQ=NORAMAN MAXDISK=1342177280\\r.SCH  
2COOCH3.freq\\0,2\\S,-2.0294359063,-0.6962534572,-0.4570065699\\C,-0.845  
4809447,-0.3639412981,0.8853159927\\C,0.3767998907,0.4063602133,0.42408  
12496\\O,0.5223624977,1.6016429309,0.5488998809\\O,1.2726590463,-0.41475  
57502,-0.1577507279\\C,2.4413211834,0.2307978553,-0.6932302517\\H,-1.359  
043997,0.2084057505,1.6642981961\\H,-0.5589707547,-1.3353838311,1.30680  
61378\\H,2.984610208,0.7555110787,0.0968979429\\H,2.1582906216,0.9470899  
613,-1.4688303624\\H,3.0500752937,-0.5699657129,-1.1132619631\\Version=  
IA32L-G03RevC.02\\State=2-A\\HF=-665.928579\\S2=0.752589\\S2-1=0.\\S2A=0.75  
0003\\RMSD=2.743e-09\\RMSF=1.174e-05\\Dipole=0.5813038,-0.5280112,0.18019  
77\\PG=C01 [X(C3H5O2S1)]\\@

r.SCH2Ph

1\\1\\GINC-LC71\\FOpt\\UB3LYP\\Gen\\C7H7S1(2)\\CYL509\\19-Jun-2008\\0\\#B3LYP/G  
EN 6D INT (GRID=ULTRAFINE) OPT FREQ=NORAMAN MAXDISK=1342177280\\r.SCH2P  
h.freq\\0,2\\S,2.7485761877,-0.1941958606,-0.2487728861\\C,1.3954036734,  
-0.1685523798,0.9865421682\\C,0.0029829314,-0.0315707773,0.4206602397\\H  
,1.6096785558,0.6210502487,1.7146530166\\H,1.5125846551,-1.1215487923,1  
.524170838\\C,-0.6696716624,1.1933365492,0.4975156409\\C,-0.6399403993,-  
1.1176700718,-0.1880267542\\C,-1.9583827097,1.3327658277,-0.021994291\\C  
, -1.9265339203,-0.9820175266,-0.7055828584\\C,-2.5903672488,0.245194201  
9,-0.6244014523\\H,-3.5937379032,0.3507000121,-1.02795999\\H,-2.41323604  
18,-1.8346024161,-1.1717744647\\H,-2.4665077135,2.2910537122,0.04585805  
57\\H,-0.1246623001,-2.0726849832,-0.261392132\\H,-0.1822822404,2.044251  
048,0.9685346972\\Version=IA32L-G03RevC.02\\State=2-A\\HF=-669.1096289\\S  
2=0.752624\\S2-1=0.\\S2A=0.750003\\RMSD=7.466e-09\\RMSF=2.331e-05\\Dipole=-  
0.5754054,-0.0248041,0.4197679\\PG=C01 [X(C7H7S1)]\\@

r.SCH3

1\\1\\GINC-LC127\\FOpt\\UB3LYP\\Gen\\C1H3S1(2)\\CYL509\\18-Jun-2008\\0\\#B3LYP/  
GEN 6D INT (GRID=ULTRAFINE) OPT FREQ=NORAMAN MAXDISK=1342177280\\r.SCH3  
.freq\\0,2\\S,0.1912298327,-0.6710754324,0.\\C,-0.2951055369,1.075991173  
5,0.\\H,-1.3936899616,1.0993485756,0.\\H,0.0523229297,1.5909556511,0.899  
6434741\\H,0.0523229297,1.5909556511,-0.8996434741\\Version=IA32L-G03Re  
vC.02\\State=2-A\\HF=-438.0597202\\S2=0.75249\\S2-1=0.\\S2A=0.750003\\RMSD=  
6.765e-09\\RMSF=1.654e-04\\Dipole=-0.2246521,0.669623,0.\\PG=CS [SG(C1H1S  
1),X(H2)]\\@

r.SO2CH3

1\\1\\GINC-LC127\\FOpt\\UB3LYP\\Gen\\C1H3O2S1(2)\\CYL509\\18-Jun-2008\\0\\#B3LY  
P/GEN 6D INT (GRID=ULTRAFINE) OPT FREQ=NORAMAN MAXDISK=1342177280\\r.SO  
2CH3.freq\\0,2\\C,-0.2954959735,-1.3420842587,-0.7983595115\\S,0.2326687  
273,0.2612981493,-0.0649391413\\O,-0.9430014243,1.1683229006,-0.1741701  
86\\O,0.8479339146,-0.0726640613,1.2491170284\\H,0.5687233955,-2.0070507  
332,-0.8138501784\\H,-0.6745094858,-1.1455814424,-1.8018687998\\H,-1.083  
3976273,-1.7409033758,-0.1546724317\\Version=IA32L-G03RevC.02\\State=2-  
A\\HF=-588.4601498\\S2=0.754937\\S2-1=0.\\S2A=0.750017\\RMSD=2.558e-09\\RMS  
F=7.621e-05\\Dipole=0.0359156,-1.0719063,-0.9798053\\PG=CS [SG(C1H1S1),X  
(H2O2)]\\@

r.SOCH3

1\\1\\GINC-LC127\\FOpt\\UB3LYP\\Gen\\C1H3O1S1(2)\\CYL509\\18-Jun-2008\\0\\#B3LY  
P/GEN 6D INT (GRID=ULTRAFINE) OPT FREQ=NORAMAN MAXDISK=1342177280\\r.SO  
CH3.freq\\0,2\\S,0.3684078351,0.3247742359,0.2610150498\\O,0.961350937,-  
1.0013442073,-0.2274326576\\C,-1.394342227,0.3114495676,-0.2307279877\\H  
, -1.9021932723,-0.5347251635,0.2403832735\\H,-1.4725281588,0.2293401826  
, -1.3184308435\\H,-1.8445580647,1.2510534597,0.1056359611\\Version=IA32  
L-G03RevC.02\\State=2-A\\HF=-513.2732772\\S2=0.753678\\S2-1=0.\\S2A=0.75001  
\\RMSD=7.187e-09\\RMSF=2.656e-05\\Dipole=-0.9343302,0.677628,0.0757606\\PG  
=C01 [X(C1H3O1S1)]\\@

r.Ph

1\1\GINC-LC59\FOpt\UB3LYP\Gen\C6H5(2)\CYL509\18-Jun-2008\0\#\B3LYP/GEN  
6D INT (GRID=ULTRAFINE) OPT FREQ=NORAMAN MAXDISK=1342177280\|r.Ph.freq  
\0,2\C,0.4686493048,0.2473621694,1.2960171962\C,-0.4433854235,-0.2340  
349348,-1.2262080703\C,0.0668711912,1.3371237364,0.5544431838\C,0.4497  
416955,-1.0644256939,0.8743621831\C,-0.0222108537,-1.300571853,-0.4271  
930004\C,-0.4012666454,1.0770496135,-0.7439244114\H,0.105332673,2.3514  
828048,0.9427407163\H,0.7805670558,-1.8839145085,1.5069530788\H,-0.058  
2889309,-2.3179534885,-0.8103367118\H,-0.7309584999,1.9013556012,-1.37  
24059535\H,-0.8070479132,-0.4259886237,-2.2319336174\|Version=IA32L-G0  
3RevC.02\State=2-A\HF=-231.5612757\|S2=0.757483\|S2-1=0.\|S2A=0.750031\|RM  
SD=6.002e-09\|RMSF=4.454e-05\|Dipole=-0.1032723,-0.0545231,-0.2856972\|PG  
=C01 [X(C6H5)]\|\@

r.C6H4CN

1\1\GINC-LC70\FOpt\UB3LYP\Gen\C7H4N1(2)\CYL509\18-Jun-2008\0\#\B3LYP/G  
EN 6D INT (GRID=ULTRAFINE) OPT FREQ=NORAMAN MAXDISK=1342177280\|r.C6H4C  
N.freq\0,2\C,0.7673021909,0.39154957,2.0037227229\C,-0.1899639786,-0.  
0968706776,-0.4957966663\C,0.5253763777,1.4862256345,1.2016083182\C,0.  
5690318221,-0.9276983308,1.6565838928\C,0.0765757227,-1.1734287229,0.3  
699016108\C,0.0331189222,1.2295104981,-0.0830036271\H,0.7029364611,2.5  
045018824,1.5351926468\H,0.779840244,-1.7478926952,2.3366821721\H,-0.1  
018626033,-2.1904919092,0.0335060251\H,-0.1785061777,2.0475225437,-0.7  
652727957\C,-0.6945704424,-0.3543810586,-1.8135660853\N,-1.1033759445,  
-0.5632973283,-2.882401292\|Version=IA32L-G03RevC.02\State=2-A\HF=-323  
.8038793\|S2=0.758193\|S2-1=0.\|S2A=0.750035\|RMSD=9.794e-09\|RMSF=5.844e-0  
5\|Dipole=0.5152828,0.263108,1.3462804\|PG=C01 [X(C7H4N1)]\|\@

r.C6H4NO2

1\1\GINC-LC28\FOpt\UB3LYP\Gen\C6H4N1O2(2)\CYL509\18-Jun-2008\0\#\B3LYP  
/GEN 6D INT (GRID=ULTRAFINE) OPT FREQ=NORAMAN MAXDISK=1342177280\|r.C6H  
4NO2.freq\0,2\C,0.8423455548,0.4438773677,2.3239737584\C,-0.060680135  
,-0.0319786492,-0.1674349267\C,0.4408328338,1.5374554721,1.5854040733\  
C,0.8247344282,-0.8705629465,1.9061852666\C,0.3546975339,-1.114442957,  
0.6104575957\C,-0.0280838133,1.2865487237,0.2906124606\H,0.4800712012,  
2.5505581666,1.9743676403\H,1.1558874429,-1.6884915827,2.5390674062\H,  
0.3064930829,-2.1165902107,0.2011552962\H,-0.3635892028,2.0864933642,-  
0.3587532802\N,-0.5544356247,-0.2921646773,-1.5296694879\O,-0.91639287  
18,0.6736072812,-2.2010804805\O,-0.5762185738,-1.4601321639,-1.9168370  
212\|Version=IA32L-G03RevC.02\State=2-A\HF=-436.0618911\|S2=0.757995\|S  
2-1=0.\|S2A=0.750033\|RMSD=3.510e-09\|RMSF=5.522e-05\|Dipole=0.4919479,0.2  
592226,1.3571653\|PG=CS [SG(C2N1),X(C4H4O2)]\|\@

r.C6H4OCH3

1\1\GINC-LC62\FOpt\UB3LYP\Gen\C7H7O1(2)\CYL509\19-Jun-2008\0\#\B3LYP/G  
EN 6D INT (GRID=ULTRAFINE) OPT FREQ=NORAMAN MAXDISK=1342177280\|r.C6H4O  
CH3.freq\0,2\C,0.5291598867,-0.0459680097,-1.3081257437\C,-0.4565266  
707,-0.0079245834,0.0944726819\C,0.7865039415,0.0371831215,0.739444609  
5\C,1.9669799145,0.0442787005,-0.0256213525\C,1.8412398156,0.005916285  
8,-1.3938529884\C,0.639382341,-0.0391506786,-2.0736713175\O,-1.6624413  
701,-0.0186742004,0.7403187931\C,-1.6654257371,0.0177078027,2.15731784  
13\H,0.5859768767,-0.0685180229,-3.1586774883\H,2.9343742222,0.0791806  
344,0.4685529561\H,0.8553229486,0.0668345501,1.8213949297\H,-1.5091882  
623,-0.0804634842,-1.7753786966\H,-1.1542229158,-0.8547810925,2.586262  
8225\H,-2.7154959059,0.0013175944,2.4552468033\H,-1.1951983124,0.93356  
75913,2.5402659447\|Version=IA32L-G03RevC.02\State=2-A\HF=-346.0822455  
\|S2=0.757767\|S2-1=0.\|S2A=0.750031\|RMSD=6.963e-09\|RMSF=2.983e-05\|Dipole  
=-0.1582765,0.0133277,0.6584874\|PG=C01 [X(C7H7O1)]\|\@

r.C6H4OH

1\1\GINC-LC47\FOpt\UB3LYP\Gen\C6H5O1(2)\CYL509\18-Jun-2008\0\#\B3LYP/G  
EN 6D INT (GRID=ULTRAFINE) OPT FREQ=NORAMAN MAXDISK=1342177280\|r.C6H4O  
H.freq\0,2\C,-0.7692550969,-0.0695296385,-0.9668909504\C,-0.757394864  
3,-0.0030274228,0.4326938551\C,0.4526008795,0.0675932237,1.1335569033\  
C,1.6690814168,0.0722038484,0.433130571\C,1.6054063309,0.0053196361,-0  
.9404376934\C,0.4387764942,-0.0655105574,-1.6741733904\O,-1.9727938137  
,-0.0108413304,1.0648640249\H,0.4390647807,-0.1167991856,-2.7596557949  
\H,2.6115703669,0.1268409766,0.9713037987\H,0.4499991026,0.118931155,2  
.221812505\H,-1.7238421045,-0.12346674,-1.4821940241\H,-1.8297325976,0  
.0389299007,2.0225455444\|Version=IA32L-G03RevC.02\State=2-A\HF=-306.7  
756848\|S2=0.757826\|S2-1=0.\|S2A=0.750032\|RMSD=6.712e-09\|RMSF=7.863e-05\  
Dipole=0.0084734,0.0289293,0.6055328\|PG=C01 [X(C6H5O1)]\|\@

r.CF2CF3

1\1\GINC-LC44\FOpt\UB3LYP\Gen\C2F5(2)\CYL509\18-Jun-2008\0\#\B3LYP/GEN  
6D INT (GRID=ULTRAFINE) OPT FREQ=NORAMAN MAXDISK=1342177280\|r.CF2CF3.  
freq\0,2\F,-1.058801049,-0.1560716874,-1.5327684975\C,-0.9101785668,-  
0.0969758518,-0.2146179586\C,0.5297144684,-0.1640791176,0.2494478574\F

, -1.6090653113, 0.8939542943, 0.3264080753\F, 1.1140619093, -1.2590952955, -0.2562223607\F, 0.5682034652, -0.2174583457, 1.5880684205\F, 1.2392437179, 0.9127076805, -0.1487055702\Version=IA32L-G03RevC.02\State=2-A\HF=-575.3382183\S2=0.752116\S2-1=0.\S2A=0.750003\RMSD=7.310e-09\RMSF=1.167e-04\Dipole=-0.1560107, -0.0570794, -0.013942\PG=C01 [X(C2F5)]\@

r.CF2H  
1\1\GINC-LC12\FOpt\UB3LYP\Gen\C1H1F2(2)\CYL509\18-Jun-2008\0\#B3LYP/GEN 6D INT (GRID=ULTRAFINE) OPT FREQ=NORAMAN MAXDISK=1342177280\r.CF2H.freq\0,2\C,0.4425343829,0.0302880093,0.249555976\H,1.4802643232,0.0830753671,-0.0898369768\F,-0.2927950402,1.0866539224,-0.1013104961\F,-0.1667016955,-1.1160765249,-0.0550782683\Version=IA32L-G03RevC.02\State=2-A\HF=-238.3054839\S2=0.751708\S2-1=0.\S2A=0.750002\RMSD=4.787e-09\RMSF=1.429e-04\Dipole=0.4791133,0.0253287,-0.0499901\PG=C01 [X(C1H1F2)]\@

r.CF3  
1\1\GINC-LC26\FOpt\UB3LYP\Gen\C1F3(2)\CYL509\18-Jun-2008\0\#B3LYP/GEN 6D INT (GRID=ULTRAFINE) OPT FREQ=NORAMAN MAXDISK=1342177280\r.CF3.freq\0,2\F,-0.1944535666,-0.2884494772,-1.2180862584\C,-0.1612913351,-0.2653273437,0.1083653597\F,1.0844490802,-0.3398081684,0.5596877822\F,-0.7824679568,0.8051425414,0.586154903\Version=IA32L-G03RevC.02\State=2-A\HF=-337.5510254\S2=0.751413\S2-1=0.\S2A=0.750001\RMSD=9.193e-09\RMSF=9.499e-05\Dipole=-0.0431848,-0.069927,0.0290461\PG=C01 [X(C1F3)]\@

r.CC12H  
1\1\GINC-LC3\FOpt\UB3LYP\Gen\C1H1C12(2)\CYL509\19-Jun-2008\0\#B3LYP/GEN 6D INT (GRID=ULTRAFINE) OPT FREQ=NORAMAN MAXDISK=1342177280\r.CC12H.freq\0,2\C,0.3176873661,-0.5486581303,-0.2903275764\C1,1.2041353662,0.8829354238,0.0596229372\C1,-1.3667344449,-0.6019829647,0.0556903264\H,0.8580601405,-1.4842430227,-0.2183600215\Version=IA32L-G03RevC.02\State=2-A\HF=-959.0341043\S2=0.753601\S2-1=0.\S2A=0.75001\RMSD=5.620e-09\RMSF=9.271e-05\Dipole=0.2062396,-0.3552698,0.0497585\PG=C01 [X(C1H1C12)]\@

r.CC13  
1\1\GINC-LC43\FOpt\UB3LYP\Gen\C1C13(2)\CYL509\19-Jun-2008\0\#B3LYP/GEN 6D INT (GRID=ULTRAFINE) OPT FREQ=NORAMAN MAXDISK=1342177280\r.CC13.freq\0,2\C,0.000566088,0.0014529732,-0.2751347933\C1,0.8518835577,1.4746328133,0.0408143902\C1,-1.7032237261,0.0000267132,0.0312148423\C1,0.8511403727,-1.4751723405,0.0250771651\Version=IA32L-G03RevC.02\State=2-A\HF=-1418.6234706\S2=0.753363\S2-1=0.\S2A=0.750009\RMSD=5.446e-09\RMSF=9.472e-05\Dipole=0.0012152,-0.0007275,0.0832673\PG=C01 [X(C1C13)]\@

r.CH2C1  
1\1\GINC-LC26\FOpt\UB3LYP\Gen\C1H2C11(2)\CYL509\19-Jun-2008\0\#B3LYP/GEN 6D INT (GRID=ULTRAFINE) OPT FREQ=NORAMAN MAXDISK=1342177280\r.CH2C1.freq\0,2\C,-0.5552872493,-0.9607618405,-0.1898386006\C1,0.2909685029,0.5034279735,0.0918118323\H,-1.6346986437,-0.9185879146,-0.2113484243\H,0.0199575905,-1.8751165919,-0.2104211208\Version=IA32L-G03RevC.02\State=2-A\HF=-499.4383231\S2=0.754071\S2-1=0.\S2A=0.750011\RMSD=2.654e-09\RMSF=1.460e-04\Dipole=-0.2374433,-0.4107761,-0.0307624\PG=C01 [X(C1H2C11)]\@

r.CH2F  
1\1\GINC-LC72\FOpt\UB3LYP\Gen\C1H2F1(2)\CYL509\18-Jun-2008\0\#B3LYP/GEN 6D INT (GRID=ULTRAFINE) OPT FREQ=NORAMAN MAXDISK=1342177280\r.CH2F.freq\0,2\C,-0.6565177966,-0.0146459942,0.037439143\F,0.6860015872,-0.0061899471,0.0158219644\H,-1.1174533115,0.9598026872,0.1638762458\H,-1.1174541938,-0.8162171979,-0.5309087835\Version=IA32L-G03RevC.02\State=2-A\HF=-139.0642653\S2=0.753037\S2-1=0.\S2A=0.750006\RMSD=3.281e-09\RMSF=1.084e-05\Dipole=-0.4658412,0.0554493,-0.1417398\PG=CS [SG(C1F1),X(H2)]\@

r.CH2OH  
1\1\GINC-AC23\FOpt\UB3LYP\Gen\C1H3O1(2)\CYL509\19-Jun-2008\0\#B3LYP/GEN 6D INT (GRID=ULTRAFINE) OPT FREQ=NORAMAN MAXDISK=1342177280\r.CH2OH.freq\0,2\C,0.0932134602,-0.0784053246,-0.6800020648\O,-0.1730410428,0.0063499153,0.6612610064\H,0.9700017808,0.4366242434,-1.0693165209\H,-0.8070545997,-0.1345359672,-1.2807850436\H,0.6621003996,0.1175443489,1.1400259021\Version=IA64L-G03RevC.02\State=2-A\HF=-115.0520323\S2=0.75293\S2-1=0.\S2A=0.750006\RMSD=9.206e-09\RMSF=1.937e-05\Dipole=0.5591389,0.2338011,0.0526082\PG=C01 [X(C1H3O1)]\@

r.CH2Ph  
1\1\GINC-LC70\FOpt\UB3LYP\Gen\C7H7(2)\CYL509\18-Jun-2008\0\#B3LYP/GEN



```

6D INT (GRID=ULTRAFINE) OPT FREQ=NORAMAN MAXDISK=1342177280\|r.CH2Ph.f
req\|0,2\C,-0.9038700985,2.2253244416,0.\C,-0.3747685394,0.9220585177,
0.\C,-0.0948447982,0.2334880424,1.2181342437\C,-0.0948447982,0.2334880
424,-1.2181342437\C,0.4267109965,-1.0504733246,1.211984871\C,0.4267109
965,-1.0504733246,-1.211984871\C,0.6923325203,-1.7045265783,0.\H,1.101
1980438,-2.710923037,0.\H,0.6310298927,-1.5533536155,2.153841864\H,0.6
310298927,-1.5533536155,-2.153841864\H,-0.2986888051,0.7356552408,2.16
07807669\H,-0.2986888051,0.7356552408,-2.1607807669\H,-1.1152189461,2.
7465024431,-0.9280751648\H,-1.1152189461,2.7465024431,0.9280751648\|Ve
rsion=IA32L-G03RevC.02\|State=2-A\|HF=-270.9151377\|S2=0.783691\|S2-1=0.\
|S2A=0.75077\|RMSD=5.267e-09\|RMSF=1.161e-05\|Dipole=0.019999,-0.0486899,0
.\|PG=CS [SG(C3H1),X(C4H6)]\|@

r.CH_CH2_2
1\|GINC-LC16\|FOpt\|UB3LYP\|Gen\C3H5(2)\|CYL509\|18-Jun-2008\|0\|#B3LYP\|GEN
6D INT (GRID=ULTRAFINE) OPT FREQ=NORAMAN MAXDISK=1342177280\|r.CH_CH2_
2.freq\|0,2\C,-0.3657777832,0.0491714814,-0.7661253671\C,-0.355933366,
0.0578474124,0.7701456647\C,0.8894644781,-0.0340165939,-0.0055075354\H
,1.6808269278,-0.7740247736,-0.006399583\H,-0.610404943,1.0003226974,1
.2561765428\H,-0.7168671373,-0.8178624981,1.3110067344\H,-0.6265253344
,0.9861158437,-1.259468461\H,-0.7335494864,-0.832565069,-1.292391806\|
|Version=IA32L-G03RevC.02\|State=2-A\|HF=-117.2134542\|S2=0.75302\|S2-1=0.\
|S2A=0.75007\|RMSD=6.542e-09\|RMSF=1.656e-05\|Dipole=-0.150749,-0.1698864
,0.0019254\|PG=C01 [X(C3H5)]\|@

r.CH2CH=CH2
1\|GINC-LC12\|FOpt\|UB3LYP\|Gen\C3H5(2)\|CYL509\|18-Jun-2008\|0\|#B3LYP\|GEN
6D INT (GRID=ULTRAFINE) OPT FREQ=NORAMAN MAXDISK=1342177280\|r.CH2CH=C
H2.freq\|0,2\C,-0.2645231763,-1.1341600991,0.4419390685\C,0.4252008181
,0.0246749205,0.1214133628\H,0.2136539909,-1.9530124871,0.9690285688\H
,-1.3101105551,-1.2582842059,0.1725510053\H,1.4727940998,0.0845933834,
0.4185591966\C,-0.1119869738,1.1124396502,-0.5490212892\H,0.4808465197
,1.9931225865,-0.7725262183\H,-1.1493280628,1.1158538934,-0.8735994056
\|Version=IA32L-G03RevC.02\|State=2-A\|HF=-117.2603508\|S2=0.781808\|S2-1=
0.\|S2A=0.750195\|RMSD=3.743e-09\|RMSF=4.993e-05\|Dipole=0.0292469,0.00140
67,0.0075648\|PG=C01 [X(C3H5)]\|@

r.CH2CH3
1\|GINC-LC16\|FOpt\|UB3LYP\|Gen\C2H5(2)\|CYL509\|18-Jun-2008\|0\|#B3LYP\|GEN
6D INT (GRID=ULTRAFINE) OPT FREQ=NORAMAN MAXDISK=1342177280\|r.CH2CH3.
freq\|0,2\C,-0.0455131941,0.260306509,-0.7503963798\H,0.7395018641,0.8
796409361,-1.1726717325\C,0.0479238853,-0.2451741012,0.6476201971\H,-0
.965226821,0.1616711279,-1.3183217185\H,1.083669566,-0.4681046169,0.93
2318145\H,-0.5472679413,-1.1552123892,0.7928837298\H,-0.3251408148,0.4
912104953,1.3824486727\|Version=IA32L-G03RevC.02\|State=2-A\|HF=-79.1578
681\|S2=0.75392\|S2-1=0.\|S2A=0.75001\|RMSD=3.021e-09\|RMSF=5.063e-05\|Dipol
e=-0.014963,0.0157321,0.0975537\|PG=C01 [X(C2H5)]\|@

r.CH_CH3_2
1\|GINC-LC110\|FOpt\|UB3LYP\|Gen\C3H7(2)\|CYL509\|19-Jun-2008\|0\|#B3LYP\|GE
N 6D INT (GRID=ULTRAFINE) OPT FREQ=NORAMAN MAXDISK=1342177280\|r.CH_CH3_
2.freq\|0,2\C,-0.2162320945,1.29800782,0.0238493546\H,0.095425968,1.4
588146208,1.0657130288\H,-1.3173105881,1.4026313646,0.0142909333\H,0.1
842468585,2.1199801523,-0.5804295077\C,0.2287570903,-0.0341833847,-0.4
816740217\H,0.4292655613,-0.1443344599,-1.5451390217\C,0.0759395501,-1
.2678962095,0.344705016\H,0.6650536962,-2.102406208,-0.0524257545\H,-0
.9739487426,-1.6128179001,0.3913412585\H,0.3864799711,-1.0974369249,1.
3853669698\|Version=IA32L-G03RevC.02\|State=2-A\|HF=-118.4781563\|S2=0.75
4003\|S2-1=0.\|S2A=0.750011\|RMSD=4.749e-09\|RMSF=2.408e-05\|Dipole=-0.0786
124,-0.0075381,0.0113041\|PG=C01 [X(C3H7)]\|@

r.C_CH3_3
1\|GINC-LC72\|FOpt\|UB3LYP\|Gen\C4H9(2)\|CYL509\|18-Jun-2008\|0\|#B3LYP\|GEN
6D INT (GRID=ULTRAFINE) OPT FREQ=NORAMAN MAXDISK=1342177280\|r.C_CH3_3
.freq\|0,2\C,-0.4761514448,-0.8802852695,1.1028950364\C,-0.0584937749,
-0.0876611733,-0.0971363407\C,-0.8538443646,1.1228711351,-0.477638624\
H,-0.1416081747,-0.4141620331,2.0494808823\H,-0.0512810452,-1.89225378
57,1.0899412285\H,-1.5679803011,-0.9694501551,1.1715528248\C,1.3478869
39,-0.2157668808,-0.5955425176\H,2.0595117077,0.3879476014,-0.00028283
7\H,1.4444078078,0.1277129028,-1.6335510993\H,1.7045483028,-1.25256702
4,-0.5446274882\H,-0.5976041842,2.0037070478,0.1417835708\H,-1.9314580
67,0.9582259752,-0.3495865973\H,-0.6749201751,1.415892601,-1.520175809
5\|Version=IA32L-G03RevC.02\|State=2-A\|HF=-157.7983171\|S2=0.75402\|S2-1=
0.\|S2A=0.750012\|RMSD=2.677e-09\|RMSF=3.767e-05\|Dipole=0.0309079,0.04630
42,0.0513057\|PG=C01 [X(C4H9)]\|@

r.CCH

```

```

1\1\GINC-AC29\FOpt\UB3LYP\Gen\C2H1(2)\CYL509\19-Jun-2008\0\#B3LYP/GEN
6D INT(GRID=ULTRAFINE) OPT FREQ=NORAMAN MAXDISK=1342177280\r.CCH.freq\
\0,2\C,-0.0407153711,0.,-0.7382974252\C,-0.0138154385,0.,0.487923726
\H,0.3271848578,0.,1.5022421953\Version=IA64L-G03RevC.02\State=2-A'\HF
F=-76.6044421\S2=0.760284\S2-1=0.\S2A=0.750057\RMSD=5.153e-09\RMSF=1.7
58e-05\Dipole=-0.0221188,0.,0.4374653\PG=CS [SG(C2H1)]\@

r.CH=C_CH3_2
1\1\GINC-LC12\FOpt\UB3LYP\Gen\C4H7(2)\CYL509\18-Jun-2008\0\#B3LYP/GEN
6D INT(GRID=ULTRAFINE) OPT FREQ=NORAMAN MAXDISK=1342177280\r.CH=C_CH
3_2.freq\0,2\C,-0.8763524765,0.1795241122,1.2105504061\C,-0.089357429
2,0.0283843999,0.1647550344\H,-1.9366259632,0.0901963,1.4166458117\C,1
.4072888403,0.2433501721,0.2389002817\C,-0.6352933629,-0.3749840957,-1
.1964155674\H,-0.1738603298,-1.3129282579,-1.5339578062\H,-0.397884755
3,0.3895088368,-1.9485998544\H,-1.7200329303,-0.5134992916,-1.17906240
5\H,1.7221068546,1.0297145876,-0.460597643\H,1.9458175478,-0.670611518
3,-0.046474751\H,1.7227661452,0.529971812,1.2453057193\Version=IA32L-
G03RevC.02\State=2-A'\HF=-156.539289\S2=0.760752\S2-1=0.\S2A=0.750038\R
MSD=8.278e-09\RMSF=7.669e-05\Dipole=0.0001386,-0.0861941,-0.3539402\PG
=C01 [X(C4H7)]\@

r.CH=CH2
1\1\GINC-LC127\FOpt\UB3LYP\Gen\C2H3(2)\CYL509\18-Jun-2008\0\#B3LYP/GE
N 6D INT(GRID=ULTRAFINE) OPT FREQ=NORAMAN MAXDISK=1342177280\r.CH=CH2
.freq\0,2\C,-0.4265319626,0.0823941787,0.5803580311\C,0.4141879408,-0
.0517351908,-0.4157589109\H,-1.498408357,0.0416494899,0.7320823737\H,1
.4924159219,0.0420708124,-0.2829251253\H,0.0800565659,-0.2676742297,-1
.4367519695\Version=IA32L-G03RevC.02\State=2-A'\HF=-77.901208\S2=0.761
317\S2-1=0.\S2A=0.750045\RMSD=8.710e-09\RMSF=4.007e-05\Dipole=-0.11088
22,-0.0489191,-0.2171438\PG=C01 [X(C2H3)]\@

r.CH=CHCH3
1\1\GINC-LC151\FOpt\UB3LYP\Gen\C3H5(2)\CYL509\18-Jun-2008\0\#B3LYP/GE
N 6D INT(GRID=ULTRAFINE) OPT FREQ=NORAMAN MAXDISK=1342177280\r.CH=CHC
H3.freq\0,2\C,-0.3336521623,0.373491049,1.2828178946\C,0.4230898746,-
0.041194908,0.2925376811\H,-1.3676790921,0.6669505877,1.4232794941\H,1
.4759852017,-0.26421146,0.4863277898\C,-0.0353999224,-0.2474779255,-1.
1382211059\H,0.5433522273,0.3840962203,-1.8245460412\H,-1.0954876652,-
0.006539678,-1.2603517363\H,0.1196025894,-1.2892049633,-1.4475163251\
Version=IA32L-G03RevC.02\State=2-A'\HF=-117.2201501\S2=0.761001\S2-1=0.
\S2A=0.750041\RMSD=7.518e-09\RMSF=6.789e-05\Dipole=-0.084881,-0.058416
6,-0.3545664\PG=C01 [X(C3H5)]\@

r.CHO
1\1\GINC-LC127\FOpt\UB3LYP\Gen\C1H1O1(2)\CYL509\18-Jun-2008\0\#B3LYP/
GEN 6D INT(GRID=ULTRAFINE) OPT FREQ=NORAMAN MAXDISK=1342177280\r.CHO.
freq\0,2\C,-0.3286695621,0.0964558989,0.4833633419\O,0.4277002641,-0.
0754280776,-0.4095007795\H,-1.4495847398,0.0246892274,0.3758261851\Ve
rsion=IA32L-G03RevC.02\State=2-A'\HF=-113.8501703\S2=0.75249\S2-1=0.\S
2A=0.750004\RMSD=1.453e-09\RMSF=3.787e-05\Dipole=-0.5899704,0.0123958,
0.1632454\PG=CS [SG(C1H1O1)]\@

r.CN
1\1\GINC-LC127\FOpt\UB3LYP\Gen\C1N1(2)\CYL509\18-Jun-2008\0\#B3LYP/GE
N 6D INT(GRID=ULTRAFINE) OPT FREQ=NORAMAN MAXDISK=1342177280\r.CN.freq\
\0,2\C,0.214006281,0.1078562891,0.5849150897\N,-0.1834339551,-0.0924
482478,-0.5013557912\Version=IA32L-G03RevC.02\State=2-SG'\HF=-92.71174
8\S2=0.757409\S2-1=0.\S2A=0.750041\RMSD=1.889e-09\RMSF=2.534e-07\Dipol
e=0.1688805,0.0851135,0.4615788\PG=C*V [C*(C1N1)]\@

r.COCH3
1\1\GINC-LC59\FOpt\UB3LYP\Gen\C2H3O1(2)\CYL509\18-Jun-2008\0\#B3LYP/G
EN 6D INT(GRID=ULTRAFINE) OPT FREQ=NORAMAN MAXDISK=1342177280\r.COCH3
.freq\0,2\C,-0.1940847561,-0.0446039805,-0.4645483715\C,1.1346913106,
0.2069974042,0.2255941761\O,-1.2558682586,-0.2228541177,0.0397654652\H
,1.5344847125,1.1662531725,-0.1192845023\H,1.0252339454,0.2110314368,1
.3167514775\H,1.8435880839,-0.5688122096,-0.0818655245\Version=IA32L-
G03RevC.02\State=2-A'\HF=-153.1798341\S2=0.752253\S2-1=0.\S2A=0.750003\
RMSD=9.654e-09\RMSF=2.206e-04\Dipole=0.9289623,0.1684694,0.1383348\PG=
C01 [X(C2H3O1)]\@

r.CON_CH2CH3_2
1\1\GINC-LC122\FOpt\UB3LYP\Gen\C5H10N1O1(2)\CYL509\19-Jun-2008\0\#B3L
YP/GEN 6D INT(GRID=ULTRAFINE) OPT FREQ=NORAMAN MAXDISK=1342177280\r.C
ON_CH2CH3_2.freq\0,2\C,-0.4793628753,0.8237681964,-1.168068435\O,0.03
91606483,0.7901009231,-2.2590564722\N,-0.1697445837,0.1343237861,-0.05
75330296\C,-0.9361494673,0.3418671135,1.1733832091\C,0.9734563799,-0.8

```

003845046,-0.0593379635\H,-0.2317586517,0.4447813126,2.0087861498\C,-1.9419044383,-0.7763910479,1.4581808779\H,-1.4562451213,1.2981437409,1.0688777336\H,1.0228797645,-1.2488061293,-1.0555205435\H,0.7545182211,-1.601369898,0.6551464094\C,2.2974874573,-0.1139355581,0.2805747964\H,-2.6751277831,-0.8479507834,0.6481814563\H,-2.4771397341,-0.5753900085,2.3932616547\H,-1.4489643721,-1.7498885378,1.5581893806\H,2.5253918168,0.659769215,-0.4590293067\H,3.1156660504,-0.8435056463,0.2777569002\H,2.2645443715,0.3535976515,1.2711382406\Version=IA32L-G03RevC.02\State=2-A\HF=-326.4866578\S2=0.752952\S2-1=0.\S2A=0.750006\RMSD=4.241e-09\RMSF=5.256e-06\Dipole=0.085896,-0.5720211,1.3893733\PG=C01 [X(C5H10N101)]\@

r.CON\_CH3\_2

1\1\GINC-LC66\FOpt\UB3LYP\Gen\C3H6N1O1(2)\CYL509\18-Jun-2008\0\#B3LYP/GEN 6D INT (GRID=ULTRAFINE) OPT FREQ=NORAMAN MAXDISK=1342177280\r.CON\_CH3\_2.freq\0,2\H,-1.0479004513,1.260455923,-1.4628339029\C,-1.2026624572,0.6436220032,-0.568728375\N,0.080983733,0.3099125583,0.0519033925\H,-1.7007924313,-0.2848242157,-0.8502378519\H,-1.8360344834,1.1990612672,0.1342554248\C,0.4810510391,-0.96451537,0.2002715985\O,-0.0741925494,-1.9892324039,-0.1131762763\C,0.9200428578,1.4054976101,0.5081196599\H,1.1878677683,2.0655912436,-0.3273309122\H,1.8322751935,0.9923320801,0.9424118919\H,0.4006500306,2.0042295656,1.2678445129\Version=IA32L-G03RevC.02\State=2-A\HF=-247.8549435\S2=0.752894\S2-1=0.\S2A=0.750005\RMSD=7.219e-09\RMSF=3.116e-05\Dipole=-0.1213329,1.4718151,-0.0032331\PG=C01 [X(C3H6N1O1)]\@

r.CONH2

1\1\GINC-LC16\FOpt\UB3LYP\Gen\C1H2N1O1(2)\CYL509\18-Jun-2008\0\#B3LYP/GEN 6D INT (GRID=ULTRAFINE) OPT FREQ=NORAMAN MAXDISK=1342177280\r.CONH2.freq\0,2\C,-0.1513347668,-0.0421615458,-0.4177950103\N,1.0546330452,0.2435106579,0.1051945167\O,-1.1897088077,-0.269684954,0.1448713288\H,1.200705654,0.2940591331,1.1110958911\H,1.8425420914,0.4118151689,-0.4996580766\Version=IA32L-G03RevC.02\State=2-A\HF=-169.2320635\S2=0.752721\S2-1=0.\S2A=0.750005\RMSD=5.767e-09\RMSF=6.439e-05\Dipole=1.3793847,0.3175095,0.1776135\PG=C01 [X(C1H2N1O1)]\@

r.CONHCH3

1\1\GINC-LC28\FOpt\UB3LYP\Gen\C2H4N1O1(2)\CYL509\18-Jun-2008\0\#B3LYP/GEN 6D INT (GRID=ULTRAFINE) OPT FREQ=NORAMAN MAXDISK=1342177280\r.CONHCH3.freq\0,2\C,0.1144247923,0.9047663218,0.4273241357\O,1.2625478581,1.0015309641,0.0718961904\N,-0.7596681607,-0.0948457288,0.2193050792\H,-1.685834544,0.0175282437,0.6043468691\C,-0.4506072501,-1.3195591745,-0.5230766246\H,0.5867659667,-1.2510575147,-0.8536235905\H,-1.1001315745,-1.4218538147,-1.3997009094\H,-0.5664108409,-2.2041874099,0.1131874872\Version=IA32L-G03RevC.02\State=2-A\HF=-208.5432196\S2=0.752832\S2-1=0.\S2A=0.750005\RMSD=5.890e-09\RMSF=1.823e-04\Dipole=-1.1607922,-0.9191297,-0.06532\PG=C01 [X(C2H4N1O1)]\@

r.COOC\_CH3\_3

1\1\GINC-LC128\FOpt\UB3LYP\Gen\C5H9O2(2)\CYL509\19-Jun-2008\0\#B3LYP/GEN 6D INT (GRID=ULTRAFINE) OPT FREQ=NORAMAN MAXDISK=1342177280\r.COOC\_CH3\_3.freq\0,2\C,-1.5092090913,0.6784513471,-0.7873163187\O,-0.9670763966,1.0657508578,-1.7851688676\O,-1.0655972646,0.0649417145,0.2845243331\C,0.400624979,-0.2924518118,0.4370234819\C,0.787810876,-1.2544357397,-0.6841118252\C,0.4269761424,-0.9707198082,1.8033786739\C,1.2209614806,0.9956322427,0.4244832249\H,1.448636638,-1.2854406719,2.0429698654\H,-0.218675877,-1.8542744196,1.8101808221\H,0.0835124305,-0.284513097,2.5835931341\H,1.8216550085,-1.5877708611,-0.5372417426\H,0.717955225,-0.7747335921,-1.6631077164\H,0.1405185305,-2.1373864248,-0.6748889562\H,2.2734434299,0.7591118649,0.619050912\H,0.8754132327,1.6801279817,1.2059794593\H,1.1559443507,1.5004812612,-0.5421229218\Version=IA32L-G03RevC.02\State=2-A\HF=-346.3521359\S2=0.752826\S2-1=0.\S2A=0.750006\RMSD=5.170e-09\RMSF=1.326e-06\Dipole=0.8544575,-0.5194661,0.720447\PG=C01 [X(C5H9O2)]\@

r.COOCH2CH3

1\1\GINC-LC16\FOpt\UB3LYP\Gen\C3H5O2(2)\CYL509\18-Jun-2008\0\#B3LYP/GEN 6D INT (GRID=ULTRAFINE) OPT FREQ=NORAMAN MAXDISK=1342177280\r.COOCH2CH3.freq\0,2\C,-1.0280715273,0.6868234398,-0.8778312379\O,-0.4226029607,0.8021788564,-1.9041561381\O,-0.6623822174,0.1596373011,0.274193809\C,0.7077578966,-0.3824282387,0.3358823976\H,1.3983186632,0.4315413874,0.0967364183\H,0.7958619253,-1.1519354868,-0.4365864965\C,0.9145096738,-0.9308717334,1.7306970191\H,1.9255103204,-1.34463645,1.8171269124\H,0.1962046355,-1.7272437689,1.9482421459\H,0.7988096219,-0.1433957479,2.4816906451\Version=IA32L-G03RevC.02\State=2-A\HF=-267.7171998\S2=0.752762\S2-1=0.\S2A=0.750005\RMSD=8.285e-09\RMSF=9.210e-05\Dipole=0.6568212,-0.5146351,0.7859486\PG=C01 [X(C3H5O2)]\@

```

r.COOCH3
1\1\GINC-LC12\FOpt\UB3LYP\Gen\C2H3O2(2)\CYL509\18-Jun-2008\0\#\B3LYP/GEN
6D INT (GRID=ULTRAFINE) OPT FREQ=NORAMAN MAXDISK=1342177280\|r.COOCH3.freq\
\0,2\C,-0.0658396903,0.9632185431,0.1043021553\O,1.1165593199,1.0304549898,
-0.0639053277\O,-0.8672295797,-0.0860350467,0.1197637564\C,-0.2243187711,-1.3790684433,
-0.1022308665\H,0.2569725394,-1.3868761011,-1.0827567121\H,-1.0274634533,-2.1131663757,-0.0560106508\H,0.516803
7605,-1.5602176667,0.6794722005\|Version=IA32L-G03RevC.02\State=2-A\HF=-228.3971658\
S2=0.752762\S2-1=0.\S2A=0.750005\RMSD=8.345e-09\RMSF=7.536e-05\Dipole=-0.2484656,-0.9862332,-0.0600959\PG=C01 [X(C2H3O2)]\|@

r.COOH
1\1\GINC-LC16\FOpt\UB3LYP\Gen\C1H1O2(2)\CYL509\18-Jun-2008\0\#\B3LYP/GEN
6D INT (GRID=ULTRAFINE) OPT FREQ=NORAMAN MAXDISK=1342177280\|r.COOH.freq\
\0,2\C,0.1443704555,0.0112838123,-0.4234353726\O,1.1357236016,0.212983425,0.207353603\O,
-1.1033814297,-0.2002432979,-0.0113029437\H,-1.1249601083,-0.1696238913,0.9722069615\
|Version=IA32L-G03RevC.02\State=2-A\HF=-189.087828\S2=0.75265\S2-1=0.\S2A=0.750005\RMSD=2.012e-09\RMSF
=1.144e-05\Dipole=-0.5651641,-0.0841771,0.5180243\PG=C01 [X(C1H1O2)]\|@

r.COPh
1\1\GINC-LC39\FOpt\UB3LYP\Gen\C7H5O1(2)\CYL509\18-Jun-2008\0\#\B3LYP/GEN
6D INT (GRID=ULTRAFINE) OPT FREQ=NORAMAN MAXDISK=1342177280\|r.COPh.freq\
\0,2\C,-1.8403781164,-0.0057886264,-0.1347289117\C,-1.7906316385,-0.0027585223,1.2642706593\C,
-0.5624480256,0.0022902487,1.9297772263\C,0.6226447087,0.0043279523,1.1958654789\C,0.5772707739,0.0013087381,-0.2039897875\C,
-0.6603910706,-0.0037720787,-0.8714236988\C,1.8478962757,0.0035422102,-0.9666194165\O,1.9957781292,0.0015428815,-2.1526484935\H,
-0.6731622761,-0.0060462784,-1.9572835874\H,1.5890454053,0.0082431363,1.6918510562\H,-0.5309384066,0.0046208125,3.0155475891\H,-2.8002280359,
-0.0097123473,-0.6441284412\H,-2.7147191635,-0.0043478895,1.8362920306\|Version=IA32L-G03RevC.02\State=2-A\HF=-344.9206262\S2=0.752759\S2-1=0.\S2A=0.750005\RMSD=7.038e-09\RMSF=2.921e-05\Dipole=-1.0118542,-0.0011421,0.9166601\PG=C01 [X(C7H5O1)]\|@

n.Cl-H
1\1\GINC-LC12\FOpt\RB3LYP\Gen\C11H1\CYL509\18-Jun-2008\0\#\B3LYP/GEN 6D INT (GRID=ULTRAFINE) OPT FREQ=NORAMAN MAXDISK=1342177280\|Cl-H.freq\
\0,1\H,0.,0.,-1.218293883\Cl,0.,0.,0.0716643461\|Version=IA32L-G03RevC.02\State=1-SG\HF=-460.7956962\RMSD=4.893e-09\RMSF=1.474e-04\Dipole=0.,0.,-0.5777023\PG=C*V [C*(H1C11)]\|@

n.Cl-BH2
1\1\GINC-LC151\FOpt\RB3LYP\Gen\B1C11H2\CYL509\18-Jun-2008\0\#\B3LYP/GEN 6D INT (GRID=ULTRAFINE) OPT FREQ=NORAMAN MAXDISK=1342177280\|Cl-BH2.freq\
\0,1\B,-0.3827015236,-0.3035725217,-1.0901717235\H,0.3988628694,-0.7941660515,-1.8403229115\H,-1.5230263514,-0.0996641981,-1.3591030218\Cl,0.1786865353,0.1418642858,0.5088402677\|Version=IA32L-G03RevC.02\State=1-A\HF=-486.2695796\RMSD=7.581e-10\RMSF=1.326e-04\Dipole=-0.0939619,-0.0741037,-0.2682509\PG=C01 [X(B1C11H2)]\|@

n.Cl-CH3
1\1\GINC-LC16\FOpt\RB3LYP\Gen\C1H3C11\CYL509\18-Jun-2008\0\#\B3LYP/GEN 6D INT (GRID=ULTRAFINE) OPT FREQ=NORAMAN MAXDISK=1342177280\|Cl-CH3.freq\
\0,1\C,-0.4164721234,0.8670162752,0.6102446889\H,0.2069901666,1.7440435256,0.4355407563\H,-0.3959009409,0.5895945921,1.6642921207\H,-1.4400100604,1.0574673134,0.28697768\Cl,0.2428090338,-0.5054825346,-0.355781099\|Version=IA32L-G03RevC.02\State=1-A\HF=-500.1085335\RMSD=8.778e-10\RMSF=2.110e-05\Dipole=-0.2996044,0.6237196,0.4390018\PG=C01 [X(C1H3C11)]\|@

n.Cl-NH2
1\1\GINC-LC16\FOpt\RB3LYP\Gen\C11H2N1\CYL509\18-Jun-2008\0\#\B3LYP/GEN 6D INT (GRID=ULTRAFINE) OPT FREQ=NORAMAN MAXDISK=1342177280\|Cl-NH2.freq\
\0,1\N,-0.2821441708,-0.36432139,-1.0518300809\H,-1.3042682887,-0.3544361516,-1.0132942601\H,-0.0273692249,0.4397021262,-1.6305693883\Cl,0.1945086299,0.1449990444,0.588627895\|Version=IA32L-G03RevC.02\State=1-A\HF=-516.1034594\RMSD=2.733e-09\RMSF=2.037e-05\Dipole=-0.5482626,0.48576,-0.5090194\PG=C01 [X(C11H2N1)]\|@

n.Cl-OH
1\1\GINC-LC59\FOpt\RB3LYP\Gen\C11H1O1\CYL509\18-Jun-2008\0\#\B3LYP/GEN 6D INT (GRID=ULTRAFINE) OPT FREQ=NORAMAN MAXDISK=1342177280\|Cl-OH.freq\
\0,1\O,-0.0306717013,-0.0609721259,1.1200440755\H,0.4327781063,0.764

```

2448717,1.3568964516\C1,-0.0110237939,-0.0162628156,-0.6068970033\\Version=IA32L-G03RevC.02\State=1-A'\HF=-535.9435469\RMSD=2.596e-09\RMSF=3.277e-05\Dipole=0.330794,0.5892945,0.1183436\PG=CS [SG(C11H1O1)]\\@

n.Cl-F

1\1\GINC-LC72\FOpt\RB3LYP\Gen\C11F1\CYL509\18-Jun-2008\0\#B3LYP/GEN 6D INT (GRID=ULTRAFINE) OPT FREQ=NORAMAN MAXDISK=1342177280\C1-F.freq\\0,1\F,-0.3900625968,0.83418578,0.5792983721\C1,0.2065037277,-0.4416277659,-0.3066873735\\Version=IA32L-G03RevC.02\State=1-SG\HF=-559.9426959\RMSD=2.861e-09\RMSF=5.253e-06\Dipole=0.1379362,-0.2949897,-0.2048549\PG=C\*V [C\*(F1C11)]\\@

n.Cl-SiH3

1\1\GINC-LC16\FOpt\RB3LYP\Gen\C11H3Si1\CYL509\18-Jun-2008\0\#B3LYP/GEN 6D INT (GRID=ULTRAFINE) OPT FREQ=NORAMAN MAXDISK=1342177280\C1-SiH3.freq\\0,1\Si,-0.470305113,0.8145805985,0.3325533065\H,-1.8632373568,0.7953537957,-0.1716712089\H,-0.4591816422,0.79538166,1.8138979646\H,0.2427939825,2.0112787296,-0.1717065902\C1,0.5096409763,-0.8827142685,-0.3603686151\\Version=IA32L-G03RevC.02\State=1-A'\HF=-751.5310613\RMSD=9.340e-09\RMSF=3.476e-05\Dipole=-0.3313391,0.5738695,0.2342843\PG=C01 [X(C11H3Si1)]\\@

n.Cl-PH2

1\1\GINC-LC26\FOpt\RB3LYP\Gen\C11H2P1\CYL509\18-Jun-2008\0\#B3LYP/GEN 6D INT (GRID=ULTRAFINE) OPT FREQ=NORAMAN MAXDISK=1342177280\C1-PH2.freq\\0,1\P,0.5414682579,-0.8672821444,-0.2114391155\H,-0.5499583506,-1.541591596,-0.8333519665\H,1.03723242,-0.3972058768,-1.4628091928\C1,-0.5064292904,0.8792958611,0.3216322289\\Version=IA32L-G03RevC.02\State=1-A'\HF=-802.7543782\RMSD=9.137e-09\RMSF=4.982e-05\Dipole=0.4958102,-0.5981522,0.1627251\PG=CS [SG(C11P1),X(H2)]\\@

n.Cl-SH

1\1\GINC-LC16\FOpt\RB3LYP\Gen\C11H1S1\CYL509\18-Jun-2008\0\#B3LYP/GEN 6D INT (GRID=ULTRAFINE) OPT FREQ=NORAMAN MAXDISK=1342177280\C1-SH.freq\\0,1\S,-0.3356676403,-0.1948418572,-0.959996599\H,0.3389432637,-1.3626466354,-1.0623182318\C1,0.295984646,0.2635362559,0.9660155186\\Version=IA32L-G03RevC.02\State=1-A'\HF=-858.966025\RMSD=2.932e-09\RMSF=5.063e-05\Dipole=0.1053498,-0.4640021,-0.3829107\PG=CS [SG(C11H1S1)]\\@

n.Cl-Cl

1\1\GINC-LC26\FOpt\RB3LYP\Gen\C12\CYL509\18-Jun-2008\0\#B3LYP/GEN 6D INT (GRID=ULTRAFINE) OPT FREQ=NORAMAN MAXDISK=1342177280\C1-Cl.freq\\0,1\Cl,-0.3684993338,0.7807665613,0.5447329659\C1,0.3684993338,-0.7807665613,-0.5447329659\\Version=IA32L-G03RevC.02\State=1-SG\HF=-920.3498788\RMSD=2.076e-09\RMSF=1.560e-05\Dipole=0.,0.,0.\PG=D\*H [C\*(C11.Cl1)]\\@

n.Cl-Br

1\1\GINC-LC72\FOpt\RB3LYP\Gen\Br1C11\CYL509\18-Jun-2008\0\#B3LYP/GEN 6D INT (GRID=ULTRAFINE) OPT FREQ=NORAMAN MAXDISK=1342177280\C1-Br.freq\\0,1\Br,-0.2585782904,0.54584833,0.381539602\C1,0.5323670684,-1.1238053853,-0.78552271\\Version=IA32L-G03RevC.02\State=1-SG\HF=-3034.0532835\RMSD=4.797e-09\RMSF=1.510e-05\Dipole=-0.0837655,0.1768256,0.1235984\PG=C\*V [C\*(C11Br1)]\\@

n.Cl-N\_CH3\_2

1\1\GINC-LC12\FOpt\RB3LYP\Gen\C2H6C11N1\CYL509\18-Jun-2008\0\#B3LYP/GEN 6D INT (GRID=ULTRAFINE) OPT FREQ=NORAMAN MAXDISK=1342177280\C1-N\_CH3\_2.freq\\0,1\C,0.5016714625,-0.2287401969,1.4945133078\H,1.5898780933,-0.1404486972,1.4783867732\H,0.2278740829,-1.0568161288,2.1589931785\H,0.0649442097,0.7037375042,1.8859520597\N,0.0234759416,-0.5873876656,0.1579342878\C,-1.436986567,-0.6788390492,0.1086739502\H,-1.7222222984,-1.5095370328,0.765019061\H,-1.7510058628,-0.9161510691,-0.909817751\H,-1.9498621922,0.2359763206,0.4456310457\C1,0.5287031178,0.7200251905,-0.9734604665\\Version=IA32L-G03RevC.02\State=1-A'\HF=-594.7271162\RMSD=5.141e-09\RMSF=7.244e-05\Dipole=-0.4756374,-0.1485047,0.7136088\PG=C01 [X(C2H6C11N1)]\\@

n.Cl-NHCH3

1\1\GINC-LC59\FOpt\RB3LYP\Gen\C1H4C11N1\CYL509\18-Jun-2008\0\#B3LYP/GEN 6D INT (GRID=ULTRAFINE) OPT FREQ=NORAMAN MAXDISK=1342177280\C1-NHCH3.freq\\0,1\N,0.1270086456,-0.2621570608,-0.7869053091\C,-1.338993903,-0.2955704141,-0.8043385426\H,-1.6832998538,-1.1016834072,-0.1522094582\H,-1.6253303366,-0.5362381606,-1.8355185193\H,-1.8251999914,0.6429960693,-0.5032341652\H,0.4397795801,0.5157968289,-1.3707457812\C1,0.6964090298,0.2404500341,0.8350633143\\Version=IA32L-G03RevC.02\State=1-A'\HF=-555.415025\RMSD=5.280e-09\RMSF=8.449e-05\Dipole=-0.5955458,0.361937

7,-0.5812815\PG=C01 [X(C1H4C11N1)]\ \@

n.C1-NHCHO

1\1\GINC-AC14\FOpt\RB3LYP\Gen\C1H2C11N1O1\CYL509\19-Jun-2008\0\#B3LYP  
/GEN 6D INT (GRID=ULTRAFINE) OPT FREQ=NORAMAN MAXDISK=2684354560\C1-NH  
CHO.freq\0,1\N,0.114940128,0.2964322551,0.764273058\H,0.0738050268,0.  
2169436239,1.774341997\C,1.3237863736,0.1675624592,0.1170432201\O,1.49  
45540146,-0.0775824395,-1.0525818406\H,2.1395493327,0.3783454181,0.838  
6062998\C1,-1.3480638596,-0.179707651,-0.0143802529\Version=IA64L-G03  
RevC.02\State=1-A\HF=-629.4362657\RMSD=9.606e-09\RMSF=6.355e-05\Dipole  
=-0.0649956,0.0829931,1.4380648\PG=C01 [X(C1H2C11N1O1)]\ \@

n.C1-NHCOCH3

1\1\GINC-AC14\FOpt\RB3LYP\Gen\C2H4C11N1O1\CYL509\19-Jun-2008\0\#B3LYP  
/GEN 6D INT (GRID=ULTRAFINE) OPT FREQ=NORAMAN MAXDISK=1342177280\C1-NH  
COCH3.freq\0,1\N,-0.3084811702,0.1889755559,0.6121148748\H,-0.3241676  
48,-0.0257997425,1.6020575066\C,0.885849814,0.1074341677,-0.093357946\  
O,0.9512165348,-0.049829119,-1.2929017269\C,2.1043601736,0.2993120974,  
0.8018693595\H,2.7243739381,1.0878961531,0.3673312738\H,2.6894071142,-  
0.6260712742,0.7977032164\H,1.8630347407,0.5666320805,1.8347025287\C1,  
-1.7849571857,-0.2569018086,-0.1643796068\Version=IA64L-G03RevC.02\St  
ate=1-A\HF=-668.7602912\RMSD=9.346e-09\RMSF=5.901e-06\Dipole=0.3373765  
,-0.0329167,1.5076321\PG=C01 [X(C2H4C11N1O1)]\ \@

n.C1-NO2

1\1\GINC-LC151\FOpt\RB3LYP\Gen\C11N1O2\CYL509\18-Jun-2008\0\#B3LYP/GE  
N 6D INT (GRID=ULTRAFINE) OPT FREQ=NORAMAN MAXDISK=1342177280\C1-NO2.f  
req\0,1\N,-0.2584847511,0.4518559448,0.338338934\O,0.5263458434,1.257  
7458324,0.7398892986\O,-1.4414154676,0.3409462941,0.4609531148\C1,0.53  
70558971,-0.9383840368,-0.7044183438\Version=IA32L-G03RevC.02\State=1  
-A\HF=-665.2612662\RMSD=2.689e-09\RMSF=1.943e-04\Dipole=-0.0071821,0.  
0127071,0.0089009\PG=CS [SG(C11N1),X(O2)]\ \@

n.C1-OCF3

1\1\GINC-LC151\FOpt\RB3LYP\Gen\C1C11F3O1\CYL509\18-Jun-2008\0\#B3LYP/  
GEN 6D INT (GRID=ULTRAFINE) OPT FREQ=NORAMAN MAXDISK=1342177280\C1-OCF  
3.freq\0,1\O,-0.6496883501,0.6496096483,-0.086955667\C,0.3858659343,0  
.0673308163,0.6223878088\F,1.539692179,0.0840147003,-0.0512648862\F,0.  
1228132138,-1.1969160466,0.9657290521\F,0.4989422464,0.8127157888,1.71  
87572687\C1,-0.9747480916,-0.1705407098,-1.5728043781\Version=IA32L-G  
03RevC.02\State=1-A\HF=-872.982\RMSD=5.741e-09\RMSF=8.194e-05\Dipole=-  
0.0395573,-0.1495572,-0.2434746\PG=C01 [X(C1C11F3O1)]\ \@

n.C1-OCH2CH3

1\1\GINC-LC59\FOpt\RB3LYP\Gen\C2H5C11O1\CYL509\18-Jun-2008\0\#B3LYP/G  
EN 6D INT (GRID=ULTRAFINE) OPT FREQ=NORAMAN MAXDISK=1342177280\C1-OCH2  
CH3.freq\0,1\O,-0.1294171351,-0.5005459444,0.2085343611\C,0.955335465  
5,0.2510214268,-0.3560917674\C,2.1391607292,-0.7052144028,-0.361899945  
4\H,1.1594062403,1.1376960439,0.2575897368\H,0.6991346206,0.5777751483  
, -1.3719833257\H,3.0130437575,-0.1960281142,-0.7837011921\H,1.92336772  
38,-1.5882151366,-0.9706360967\H,2.3822919458,-1.0299367807,0.65410141  
56\C1,-1.5711108456,0.4604843677,0.2855473441\Version=IA32L-G03RevC.0  
2\State=1-A\HF=-614.5753377\RMSD=9.056e-09\RMSF=7.422e-05\Dipole=0.685  
282,0.2902889,-0.2933008\PG=C01 [X(C2H5C11O1)]\ \@

n.C1-OCH3

1\1\GINC-LC151\FOpt\RB3LYP\Gen\C1H3C11O1\CYL509\18-Jun-2008\0\#B3LYP/  
GEN 6D INT (GRID=ULTRAFINE) OPT FREQ=NORAMAN MAXDISK=1342177280\C1-OCH  
3.freq\0,1\O,-0.3842474583,0.0019032047,0.7208859789\C,0.9508694052,-  
0.0062515014,1.2213622844\H,1.4956926939,-0.907717308,0.9176237315\H,0  
.8123191525,-0.0059840929,2.307786868\H,1.5063236324,0.8890129797,0.91  
85385769\C1,-0.3791513085,0.0027630466,-1.0140712184\Version=IA32L-G0  
3RevC.02\State=1-A\HF=-575.2553665\RMSD=6.697e-09\RMSF=1.061e-04\Dipol  
e=0.686273,-0.0042129,0.299697\PG=C01 [X(C1H3C11O1)]\ \@

n.C1-OCHO

1\1\GINC-LC72\FOpt\RB3LYP\Gen\C1H1C11O2\CYL509\18-Jun-2008\0\#B3LYP/G  
EN 6D INT (GRID=ULTRAFINE) OPT FREQ=NORAMAN MAXDISK=1342177280\C1-OCHO  
.freq\0,1\O,-0.140241342,0.8952340153,0.0049300918\C,1.1793646045,0.5  
541630118,0.0057787858\O,1.6635084347,-0.5371442989,0.0004543809\H,1.7  
155257931,1.5184483367,0.0125914183\C1,-1.233991186,-0.4534202434,-0.0  
053141126\Version=IA32L-G03RevC.02\State=1-A\HF=-649.2843252\RMSD=2.7  
39e-09\RMSF=9.046e-05\Dipole=-0.0314645,0.5654301,0.0032338\PG=C01 [X(  
C1H1C11O2)]\ \@

n.C1-OCOCH3

1\1\GINC-AC8\FOpt\RB3LYP\Gen\C2H3C11O2\CYL509\19-Jun-2008\0\#B3LYP/GE

N 6D INT (GRID=ULTRAFINE) OPT FREQ=NORAMAN MAXDISK=2684354560\C1-OCOC  
3.freq\0,1\O,0.4409912053,-0.0869050675,-0.5966651722\C,0.4051393163,  
0.0035813349,0.7791390399\C,1.837983963,-0.0367204899,1.2707665702\O,-  
0.5873324305,0.1170353025,1.4408823436\H,1.8314557782,-0.3426958119,2.  
3181212148\H,2.269333584,0.9672244986,1.1939639314\H,2.4498278209,-0.7  
180612218,0.6758788922\C1,-1.1081545328,0.0030191521,-1.3671255924\Ver  
sion=IA64L-G03RevC.02\State=1-A\HF=-688.610813\RMSD=4.141e-09\RMSF=3.  
450e-06\Dipole=0.8860813,-0.0245882,0.0349299\PG=C01 [X(C2H3C11O2)]\@

n.Cl-Si\_CH3\_3

1\1\GINC-LC110\FOpt\RB3LYP\Gen\C3H9C11Si1\CYL509\18-Jun-2008\0\#B3LYP  
/GEN 6D INT (GRID=ULTRAFINE) OPT FREQ=NORAMAN MAXDISK=1342177280\C1-Si  
\_CH3\_3.freq\0,1\H,0.9254450426,-1.6009521311,-1.996586285\C,0.8977102  
95,-1.5546672641,-0.9002380598\H,1.9309117197,-1.5728886969,-0.5369913  
507\H,0.3960832926,-2.4586613145,-0.538370107\Si,0.0000349386,-0.00001  
83755,-0.3373416031\C,-1.7950806861,-0.0001397324,-0.9004975675\C,0.89  
75627999,1.5546579716,-0.9003772793\H,-1.8488708049,-0.0011601053,-1.9  
968532459\H,-2.3271656665,0.8863615992,-0.5388569688\H,-2.327539103,-0  
.8857379978,-0.5371986009\H,1.9315414744,1.5718129186,-0.5393045526\H,  
0.3972664013,2.4585430042,-0.5363988466\H,0.92295042,1.6022377776,-1.9  
967265781\C1,-0.0001333158,0.0000939031,1.7733380246\Version=IA32L-G0  
3RevC.02\State=1-A\HF=-869.5225589\RMSD=9.742e-09\RMSF=9.389e-05\Dipol  
e=0.0000807,-0.0000381,-1.0620148\PG=C01 [X(C3H9C11Si1)]\@

n.Cl-P\_CH3\_2

1\1\GINC-LC72\FOpt\RB3LYP\Gen\C2H6C11P1\CYL509\18-Jun-2008\0\#B3LYP/G  
EN 6D INT (GRID=ULTRAFINE) OPT FREQ=NORAMAN MAXDISK=1342177280\C1-P\_CH  
3\_2.freq\0,1\C,-0.8387939308,1.2455405192,1.0387415975\H,-0.147688863  
,2.0418899693,1.3293731953\H,-1.5033209034,1.0444838298,1.8885720563\H  
, -1.4370031795,1.5809212903,0.1856255851\P,0.1170491195,-0.3081084642,  
0.6786788235\C,-1.250067892,-1.3295663652,-0.0593811166\H,-0.831657569  
1,-2.2405275888,-0.4968091827\H,-1.815476148,-0.7888316126,-0.82492834  
29\H,-1.9292079459,-1.6220645733,0.7514490898\C1,1.0848111032,0.300582  
9838,-1.111154567\Version=IA32L-G03RevC.02\State=1-A\HF=-881.4043866\  
RMSD=7.575e-09\RMSF=7.244e-06\Dipole=-1.0020748,-0.0523785,0.4981351\P  
G=C01 [X(C2H6C11P1)]\@

n.Cl-SC\_CH3\_2CN

1\1\GINC-LC71\FOpt\RB3LYP\Gen\C4H6C11N1S1\CYL509\18-Jun-2008\0\#B3LYP  
/GEN 6D INT (GRID=ULTRAFINE) OPT FREQ=NORAMAN MAXDISK=1342177280\C1-SC  
\_CH3\_2CN.freq\0,1\S,0.9656761643,-0.6553321111,-0.5027883309\C,-0.809  
7759878,-0.442763587,0.0360690644\C,-0.9613315559,-0.5211653999,1.5635  
915497\C,-1.530887414,-1.6147536912,-0.6691100561\C,-1.3289991283,0.83  
67319092,-0.466090007\H,-0.5916399347,-1.4869419723,1.9197369247\H,-0.  
4024961288,0.276712972,2.0581996741\H,-2.0182474301,-0.4205719983,1.83  
40479401\H,-1.4227050006,-1.5611360919,-1.7560477669\H,-2.5976855937,-  
1.5721668748,-0.4280431747\H,-1.132768809,-2.5694361571,-0.3115719933\  
N,-1.7650456579,1.8436581361,-0.8460530759\C1,1.9327063758,0.90382068,  
0.462582348\Version=IA32L-G03RevC.02\State=1-A\HF=-1069.1484007\RMSD=  
3.701e-09\RMSF=2.636e-05\Dipole=-0.3440992,-1.5037463,0.5361926\PG=C01  
[X(C4H6C11N1S1)]\@

n.Cl-SCH2COOCH3

1\1\GINC-LC151\FOpt\RB3LYP\Gen\C3H5C11O2S1\CYL509\18-Jun-2008\0\#B3LY  
P/GEN 6D INT (GRID=ULTRAFINE) OPT FREQ=NORAMAN MAXDISK=1342177280\C1-S  
CH2COOCH3.freq\0,1\S,-1.4015696671,-0.9819200911,-0.2199366779\C,-0.2  
041527548,-0.6241337872,1.1170336563\C,1.0446327094,0.1127814154,0.661  
7955149\O,1.2880063424,1.2655940844,0.9360015831\O,1.8367864952,-0.682  
4962645,-0.0797356668\C,3.02392025,-0.056292839,-0.599528507\H,-0.6887  
221162,-0.0551841146,1.9118083352\H,0.0580994146,-1.6237505467,1.48464  
01079\H,3.6528230898,0.3070990744,0.2172503735\H,2.7578268743,0.782645  
5691,-1.2474176938\H,3.5376304224,-0.8326053316,-1.1663580457\C1,-2.06  
336982,0.9337415007,-0.6827569145\Version=IA32L-G03RevC.02\State=1-A\  
HF=-1126.1542574\RMSD=8.230e-09\RMSF=6.458e-06\Dipole=0.7531552,-0.803  
893,0.1805638\PG=C01 [X(C3H5C11O2S1)]\@

n.Cl-SCH2Ph

1\1\GINC-LC110\FOpt\RB3LYP\Gen\C7H7C11S1\CYL509\18-Jun-2008\0\#B3LYP/  
GEN 6D INT (GRID=ULTRAFINE) OPT FREQ=NORAMAN MAXDISK=1342177280\C1-SCH  
2Ph.freq\0,1\S,2.1967961102,-0.5997966237,-0.0355397719\C,0.835642030  
1,-0.4900722469,1.2073883309\C,-0.5558019152,-0.3495110492,0.651664421  
6\H,1.0782829143,0.3151790694,1.905923806\H,0.9632827724,-1.44212182,1  
.740982468\C,-1.2183988176,0.881833261,0.7144931647\C,-1.2102448748,-1  
.4422491787,0.0661167143\C,-2.5103311691,1.0203048135,0.2034126662\C,-  
2.499779035,-1.306572461,-0.4428269783\C,-3.1538204398,-0.073152939,-0  
.3755693619\H,-4.1600019621,0.0324220859,-0.7720197997\H,-2.9964259295  
, -2.1630455882,-0.8907589372\H,-3.0116764933,1.9827556346,0.2588052491

\H,-0.7025425161,-2.4022587262,0.0052028468\H,-0.7199475735,1.7362153874,1.1654396776\Cl,2.1339233149,1.2996540434,-0.8819419238\Version=IA32L-G03RevC.02\State=1-A\HF=-1129.3379859\RMSD=5.157e-09\RMSF=1.656e-06\Dipole=-0.7053664,-0.3429044,0.6033392\PG=C01 [X(C7H7C11S1)]\@

n.Cl-SCH3

1\1\GINC-LC59\FOpt\RB3LYP\Gen\C1H3C11S1\CYL509\18-Jun-2008\0\#B3LYP/GEN 6D INT (GRID=ULTRAFINE) OPT FREQ=NORAMAN MAXDISK=1342177280\Cl-SCH3.freq\0,1\S,-0.7281953161,-0.4735518792,0.\C,-1.2073153893,1.2825349089,0.\H,-2.3035441949,1.2754501871,0.\H,-0.8503784796,1.7903735723,0.8986530272\H,-0.8503784796,1.7903735723,-0.8986530272\Cl,1.3470187381,-0.2926221599,0.\Version=IA32L-G03RevC.02\State=1-A\HF=-898.2876887\RMSD=6.826e-09\RMSF=1.331e-05\Dipole=-0.6644961,0.662857,0.\PG=CS [SG(C1H1C11S1),X(H2)]\@

n.Cl-SO2CH3

1\1\GINC-LC151\FOpt\RB3LYP\Gen\C1H3C11O2S1\CYL509\18-Jun-2008\0\#B3LYP/GEN 6D INT (GRID=ULTRAFINE) OPT FREQ=NORAMAN MAXDISK=1342177280\Cl-SO2CH3.freq\0,1\C,-0.7656694303,-1.5799296416,-0.4141172583\S,-0.3056448451,-0.0202842117,0.3669092592\O,-1.4098322382,0.921013559,0.2459973106\O,0.344685464,-0.2947390567,1.6403439919\H,0.1097414166,-2.2296734886,-0.4314625801\H,-1.1327041028,-1.3687494932,-1.4188563149\H,-1.5563107262,-2.0061007186,0.2091678685\Cl,1.2108695123,0.6116737011,-0.9903190583\Version=IA32L-G03RevC.02\State=1-A\HF=-1048.6806789\RMSD=7.283e-09\RMSF=1.058e-04\Dipole=-0.3796788,-1.3385614,-0.6893596\PG=CS [SG(C1H1C11S1),X(H2O2)]\@

n.Cl-SOCH3

1\1\GINC-LC26\FOpt\RB3LYP\Gen\C1H3C11O1S1\CYL509\18-Jun-2008\0\#B3LYP/GEN 6D INT (GRID=ULTRAFINE) OPT FREQ=NORAMAN MAXDISK=1342177280\Cl-SOCH3.freq\0,1\S,0.0367937019,-0.4098030315,0.6000244831\O,0.5900369654,-1.6568008189,0.0126800889\C,-1.7082152485,-0.328939404,0.0508223914\H,-2.2243422627,-1.1582550543,0.5441609364\H,-1.7390386382,-0.4533458874,-1.033444054\H,-2.1382199585,0.6295166293,0.349289885\Cl,0.6495233763,1.3392338701,-0.5803984445\Version=IA32L-G03RevC.02\State=1-A\HF=-973.479694\RMSD=7.886e-09\RMSF=2.585e-05\Dipole=-1.271794,0.0331219,0.5576637\PG=C01 [X(C1H3C11O1S1)]\@

n.Cl-Ph

1\1\GINC-LC127\FOpt\RB3LYP\Gen\C6H5C11\CYL509\18-Jun-2008\0\#B3LYP/GEN 6D INT (GRID=ULTRAFINE) OPT FREQ=NORAMAN MAXDISK=1342177280\Cl-Ph.freq\0,1\C,0.1711257296,0.0892743045,0.4653602463\C,-0.7708024629,-0.4029106424,-2.102068708\C,-0.250125724,1.1591069597,-0.3236037629\C,0.1295320106,-1.222897003,-0.0063691764\C,-0.3450230101,-1.4610829278,-1.2973316399\C,-0.7219795507,0.9033705181,-1.6123091338\H,-0.2083292859,2.170775378,0.0656004289\H,0.4626711869,-2.0380614367,0.6262752505\H,-0.3800956411,-2.4806917822,-1.6712906581\H,-1.0517697172,1.7323724278,-2.2325283958\H,-1.1391117003,-0.5953105213,-3.1055818694\Cl,0.7670748938,0.4010648677,2.0926740168\Version=IA32L-G03RevC.02\State=1-A\HF=-691.8449668\RMSD=5.508e-09\RMSF=6.666e-05\Dipole=-0.2572257,-0.1344545,-0.7014742\PG=C01 [X(C6H5C11)]\@

n.Cl-C6H4CN

1\1\GINC-LC70\FOpt\RB3LYP\Gen\C7H4C11N1\CYL509\18-Jun-2008\0\#B3LYP/GEN 6D INT (GRID=ULTRAFINE) OPT FREQ=NORAMAN MAXDISK=1342177280\Cl-C6H4CN.freq\0,1\C,0.4485154549,0.2266425478,1.1593950781\C,-0.5377288783,-0.272078543,-1.3919994541\C,0.1839810904,1.2996145058,0.3061508439\C,0.2272294502,-1.091799628,0.7568832455\C,-0.2663084844,-1.3395466819,-0.5201221437\C,-0.309491637,1.048260928,-0.9701747913\H,0.362717366,2.3160910878,0.6387002021\H,0.4391571739,-1.9106549581,1.4353543341\H,-0.4430579987,-2.3591732156,-0.8464392127\H,-0.5195848329,1.8723858532,-1.6440002437\C,-1.0464099746,-0.5291933615,-2.7072806905\N,-1.4587853441,-0.7379229543,-3.7747832959\Cl,1.0690319748,0.5409066652,2.7672209097\Version=IA32L-G03RevC.02\State=1-A\HF=-784.0866954\RMSD=8.265e-09\RMSF=5.863e-05\Dipole=0.3942316,0.1994426,1.020114\PG=C01 [X(C7H4C11N1)]\@

n.Cl-C6H4NO2

1\1\GINC-LC71\FOpt\RB3LYP\Gen\C6H4C11N1O2\CYL509\18-Jun-2008\0\#B3LYP/GEN 6D INT (GRID=ULTRAFINE) OPT FREQ=NORAMAN MAXDISK=1342177280\Cl-C6H4NO2.freq\0,1\C,0.5563305076,0.2912273526,1.5203653258\C,-0.3737754741,-0.1957397624,-1.0220421939\C,0.1349821084,1.3636099033,0.7297373593\C,0.5154914011,-1.023130266,1.0476840296\C,0.044965316,-1.2694838214,-0.2386408785\C,-0.3355388102,1.117223941,-0.5565832318\H,0.1759030479,2.3750461099,1.1179329151\H,0.8477668956,-1.8392121606,1.6793301724\H,-0.0013608733,-2.2745832653,-0.6392461642\H,-0.6705139628,1.9226718052,-1.198378361\N,-0.8710575992,-0.4560424749,-2.3809319403\O,-1.23380



14976,0.5108925166,-3.0500800279\O,-0.8933255025,-1.6247392531,-2.7655  
844557\C1,1.1475231644,0.6009943908,3.1381810839\\Version=IA32L-G03Rev  
C.02\State=1-A\HF=-896.344808\RMSD=5.571e-09\RMSF=7.562e-05\Dipole=0.  
3899849,0.204198,1.0661366\PG=CS [SG(C2C11N1),X(C4H4O2)]\@

n.C1-C6H4OCH3

1\1\GINC-LC28\FOpt\RB3LYP\Gen\C7H7C11O1\CYL509\18-Jun-2008\0\#B3LYP/G  
EN 6D INT (GRID=ULTRAFINE) OPT FREQ=NORAMAN MAXDISK=1342177280\C1-C6H4  
OCH3.freq\0,1\C,-1.2976605839,-0.0492072971,-0.7572928382\C,-1.235297  
8577,-0.011424642,0.6439888132\C,0.0109320164,0.0334850359,1.279237099  
5\C,1.1825879986,0.0404042348,0.5162197226\C,1.1061325696,0.0026548389  
, -0.8713651369\C,-0.1334652144,-0.0423113991,-1.5148794586\O,-2.437004  
6088,-0.0220676926,1.2891414349\C,-2.4382184758,0.0143886019,2.7076823  
095\H,-0.183213742,-0.0715574622,-2.5981439241\H,2.1494387358,0.075194  
5146,1.0070834055\H,0.0886290408,0.0633120247,2.3598504122\H,-2.272445  
772,-0.0837949675,-1.2333330756\H,-1.9265019369,-0.85848919,3.13431799  
18\H,-3.4878617926,-0.0019792387,3.0061067031\H,-1.967490711,0.9305373  
527,3.0883105516\C1,2.5838482548,0.0114930746,-1.8293450947\\Version=I  
A32L-G03RevC.02\State=1-A\HF=-806.3671032\RMSD=7.334e-09\RMSF=5.503e-0  
5\Dipole=-0.6026446,0.0111623,0.9656502\PG=C01 [X(C7H7C11O1)]\@

n.C1-C6H4OH

1\1\GINC-LC44\FOpt\RB3LYP\Gen\C6H5C11O1\CYL509\18-Jun-2008\0\#B3LYP/G  
EN 6D INT (GRID=ULTRAFINE) OPT FREQ=NORAMAN MAXDISK=1342177280\C1-C6H4  
OH.freq\0,1\C,-1.5823512004,-0.07160115,-0.4833312882\C,-1.5797141053  
, -0.0052998306,0.9145833655\C,-0.3658589338,0.0647617891,1.6052984456\  
C,0.84099128,0.0687370445,0.9049803657\C,0.827150986,0.0024387441,-0.4  
859041659\C,-0.3798443682,-0.0677715849,-1.1838217382\O,-2.7921550308,  
-0.0127560513,1.5450363254\H,-0.3775931846,-0.1190368901,-2.2673924367  
\H,1.7833291435,0.1230400726,1.4394685399\H,-0.3572757673,0.1165034436  
,2.6923974846\H,-2.5318006685,-0.125589847,-1.0061336227\H,-2.65254679  
87,0.0369954,2.5033805839\C1,2.3476991513,0.0072085976,-1.3736965329\\  
Version=IA32L-G03RevC.02\State=1-A\HF=-767.0603187\RMSD=3.624e-09\RMSF  
=6.121e-05\Dipole=-0.4382982,0.0279614,0.8745564\PG=C01 [X(C6H5C11O1)]\@

n.C1-CF2CF3

1\1\GINC-LC59\FOpt\RB3LYP\Gen\C2C11F5\CYL509\18-Jun-2008\0\#B3LYP/GEN  
6D INT (GRID=ULTRAFINE) OPT FREQ=NORAMAN MAXDISK=1342177280\C1-CF2CF3  
.freq\0,1\F,0.5728276051,0.2679812972,-1.6145628837\C,-0.5412811131,  
0.2036482286,-0.275210256\C,0.9400521203,0.1712791328,0.1814494654\F,-  
1.1171667253,1.3069533711,0.2248683269\F,1.5606292545,-0.8990640583,-0  
.3232167387\F,1.0166181441,0.1393258212,1.5150708862\F,1.5507306539,1.  
2776137048,-0.2627677504\C1,-1.431439973,-1.2402856113,0.2769434224\\  
Version=IA32L-G03RevC.02\State=1-A\HF=-1035.5993631\RMSD=9.540e-09\RMSF  
=6.417e-05\Dipole=-0.007884,-0.0204572,0.0092248\PG=C01 [X(C2C11F5)]\@

n.C1-CF2H

1\1\GINC-LC76\FOpt\RB3LYP\Gen\C1H1C11F2\CYL509\18-Jun-2008\0\#B3LYP/G  
EN 6D INT (GRID=ULTRAFINE) OPT FREQ=NORAMAN MAXDISK=1342177280\C1-CF2H  
.freq\0,1\C,0.2264043689,0.0020482611,-0.5390477823\H,1.2433612144,-  
0.0521012142,-0.9299337626\F,-0.4945249046,1.0452970762,-0.9766682443\F,  
-0.370488416,-1.1329598151,-0.9328594116\C1,0.3049019093,0.0426219923,  
1.2558805506\\Version=IA32L-G03RevC.02\State=1-A\HF=-698.5720444\RMSD=  
1.173e-09\RMSF=7.763e-05\Dipole=0.4886227,0.0215162,-0.3133445\PG=C01  
[X(C1H1C11F2)]\@

n.C1-CF3

1\1\GINC-LC110\FOpt\RB3LYP\Gen\C1C11F3\CYL509\18-Jun-2008\0\#B3LYP/GE  
N 6D INT (GRID=ULTRAFINE) OPT FREQ=NORAMAN MAXDISK=1342177280\C1-CF3.f  
req\0,1\F,0.1722592582,0.3139247948,-1.4496980185\C,0.1773681396,0.29  
16537566,-0.1192022055\F,1.4371327983,0.2632111054,0.3084875389\F,-0.4  
090555199,1.3966179706,0.3345652232\C1,-0.698072804,-1.1478651398,0.46  
91188553\\Version=IA32L-G03RevC.02\State=1-A\HF=-797.8167605\RMSD=6.22  
5e-09\RMSF=1.476e-04\Dipole=0.0054393,0.0089441,-0.003666\PG=C01 [X(C1  
C11F3)]\@

n.C1-CC12H

1\1\GINC-LC127\FOpt\RB3LYP\Gen\C1H1C13\CYL509\18-Jun-2008\0\#B3LYP/GE  
N 6D INT (GRID=ULTRAFINE) OPT FREQ=NORAMAN MAXDISK=1342177280\C1-CC12H  
.freq\0,1\C,0.4199260178,-0.0309708827,-0.1711876976\H,1.4236182571,-  
0.104950287,-0.5782056519\C1,-0.2900197018,1.4991440735,-0.7628023837\  
C1,-0.5036689543,-1.4459211927,-0.7542591211\C1,0.5617372229,-0.036118  
4347,1.6114927893\\Version=IA32L-G03RevC.02\State=1-A\HF=-1419.2791102  
\RMSD=1.851e-09\RMSF=7.535e-05\Dipole=0.4632858,-0.0342364,-0.1900525\  
PG=C01 [X(C1H1C13)]\@

```

n.Cl-CC13
1\1\GINC-LC72\FOpt\RB3LYP\Gen\C1C14\CYL509\18-Jun-2008\0\#\B3LYP\GEN 6
D INT (GRID=ULTRAFINE) OPT FREQ=NORAMAN MAXDISK=1342177280\C1-CC13.fre
q\0,1\C,-0.0000522091,-0.0000556381,-0.0009583141\C1,1.6553946181,-0.
1745026194,-0.6643532442\C1,-0.7199339022,1.5332643754,-0.5853051569\C
1,-1.0093131458,-1.3786546524,-0.541016181\C1,0.0738708567,0.019912533
4,1.7910128107\Version=IA32L-G03RevC.02\State=1-A\HF=-1878.8542564\RM
SD=9.434e-09\RMSF=1.638e-04\Dipole=-0.0002324,-0.000069,-0.0033128\PG=
C01 [X(C1C14)]\@

n.Cl-CH2C1
1\1\GINC-LC16\FOpt\RB3LYP\Gen\C1H2C12\CYL509\18-Jun-2008\0\#\B3LYP\GEN
6D INT (GRID=ULTRAFINE) OPT FREQ=NORAMAN MAXDISK=1342177280\C1-CH2C1.
freq\0,1\C,-0.6268549588,-0.0076008646,0.443252681\C1,0.16471688,1.49
8302796,-0.1164724876\H,-0.6072385883,-0.0137301188,1.530628206\H,-1.6
455030669,-0.0137303657,0.0622981387\C1,0.1890402616,-1.4940048153,-0.
1336711848\Version=IA32L-G03RevC.02\State=1-A'\HF=-959.696347\RMSD=8.
701e-09\RMSF=2.209e-05\Dipole=-0.5951324,-0.0071222,0.4208215\PG=CS [S
G(C1C12),X(H2)]\@

n.Cl-CH2F
1\1\GINC-LC16\FOpt\RB3LYP\Gen\C1H2C11F1\CYL509\18-Jun-2008\0\#\B3LYP/G
EN 6D INT (GRID=ULTRAFINE) OPT FREQ=NORAMAN MAXDISK=1342177280\C1-CH2F
.freq\0,1\C,-0.1614674724,0.2917634803,-0.7458100554\F,1.1777800133,0
.3752410028,-0.9591982519\H,-0.6085016625,1.285740803,-0.801180749\H,-
0.6085024903,-0.4007849765,-1.460955304\C1,-0.494953596,-0.3536885726,
0.9041047443\Version=IA32L-G03RevC.02\State=1-A'\HF=-599.3319432\RMSD
=3.753e-09\RMSF=2.700e-05\Dipole=-0.445697,0.2246031,-0.5741333\PG=CS
[SG(C1C11F1),X(H2)]\@

n.Cl-CH2OH
1\1\GINC-LC75\FOpt\RB3LYP\Gen\C1H3C11O1\CYL509\19-Jun-2008\0\#\B3LYP/G
EN 6D INT (GRID=ULTRAFINE) OPT FREQ=NORAMAN MAXDISK=1342177280\C1-CH2O
H.freq\0,1\C,0.3430136365,-0.7350494487,-0.19963828\O,0.3703192856,-1
.0998428119,1.1261309716\H,1.3299813414,-0.6631404796,-0.6655260639\H,
-0.2935178299,-1.4414599163,-0.7291850342\H,0.9881923429,-0.518656208,
1.5988014208\C1,-0.4144289388,0.9313115171,-0.4714887303\Version=IA32
L-G03RevC.02\State=1-A'\HF=-575.3184757\RMSD=3.217e-09\RMSF=4.390e-05\D
ipole=0.7692375,-0.3615773,0.0551035\PG=C01 [X(C1H3C11O1)]\@

n.Cl-CH2Ph
1\1\GINC-LC70\FOpt\RB3LYP\Gen\C7H7C11\CYL509\18-Jun-2008\0\#\B3LYP\GEN
6D INT (GRID=ULTRAFINE) OPT FREQ=NORAMAN MAXDISK=1342177280\C1-CH2Ph.
freq\0,1\C,-0.331576553,1.6683662712,0.\C,0.3144322789,0.3156587289,0
.\C,0.6229526307,-0.3247405992,1.2071403329\C,0.6229526307,-0.32474059
92,-1.2071403329\C,1.2294474611,-1.5802564785,1.2083237332\C,1.2294474
611,-1.5802564785,-1.2083237332\C,1.5338197971,-2.2106037877,0.\H,2.00
83053848,-3.188189458,0.\H,1.4661285659,-2.0654852759,2.15131054\H,1.4
661285659,-2.0654852759,-2.15131054\H,0.3838121973,0.1635339976,2.1489
610999\H,0.3838121973,0.1635339976,-2.1489610999\H,-0.0760047633,2.245
086506,-0.8897729273\H,-0.0760047633,2.245086506,0.8897729273\C1,-2.2729
97077426,1.5718445094,0.\Version=IA32L-G03RevC.02\State=1-A'\HF=-731.
1602439\RMSD=4.400e-09\RMSF=1.425e-05\Dipole=0.9499953,-0.1856628,0.\P
G=CS [SG(C3H1C11),X(C4H6)]\@

n.Cl-CH_CH2_2
1\1\GINC-LC127\FOpt\RB3LYP\Gen\C3H5C11\CYL509\18-Jun-2008\0\#\B3LYP/GE
N 6D INT (GRID=ULTRAFINE) OPT FREQ=NORAMAN MAXDISK=1342177280\C1-CH_CH
2_2.freq\0,1\C,-1.2114361605,-0.5891771517,-0.7470184134\C,-1.2018633
161,-0.5807336627,0.7687725444\C,0.0862147706,-0.6009201638,0.00280061
76\H,0.6898113077,-1.5016687568,0.0040069656\H,-1.4771610767,0.3457690
245,1.2630575159\H,-1.4812641822,-1.4819150375,1.3083521391\H,-1.49301
83203,0.3317819187,-1.2480773953\H,-1.4975688031,-1.4962932881,-1.2729
527356\C1,1.130688783,0.8486654122,-0.0118655871\Version=IA32L-G03Rev
C.02\State=1-A'\HF=-577.4901384\RMSD=5.020e-09\RMSF=4.884e-05\Dipole=-0
.5659952,-0.5892213,0.0068554\PG=C01 [X(C3H5C11)]\@

n.Cl-CH2CH=CH2
1\1\GINC-LC127\FOpt\RB3LYP\Gen\C3H5C11\CYL509\18-Jun-2008\0\#\B3LYP/GE
N 6D INT (GRID=ULTRAFINE) OPT FREQ=NORAMAN MAXDISK=1342177280\C1-CH2CH
=CH2.freq\0,1\C,-0.4291276112,-0.1497447262,0.6080142522\C,0.24549749
17,1.1564683207,0.3525511705\H,-0.3111147508,-0.4803302091,1.642660312
1\H,-1.4904284499,-0.1189276205,0.3560924202\H,1.3040776015,1.20535517
35,0.6019267836\C,-0.3835052514,2.2259116993,-0.1361384929\H,0.1313691
91,3.1707045089,-0.2849889666\H,-1.4379920227,2.1983719347,-0.40249825
11\C1,0.3062882739,-1.4924109147,-0.4035149339\Version=IA32L-G03RevC.

```

02\State=1-A\HF=-577.5013633\RMSD=3.579e-09\RMSF=2.881e-05\Dipole=-0.3092136,0.7147278,0.4531096\PG=C01 [X(C3H5C11)]\@

n.C1-CH2CH3

1\1\GINC-LC76\FOpt\RB3LYP\Gen\C2H5C11\CYL509\18-Jun-2008\0\#B3LYP/GEN  
6D INT (GRID=ULTRAFINE) OPT FREQ=NORAMAN MAXDISK=1342177280\C1-CH2CH3  
.freq\0,1\C,-0.3236564932,0.7463137653,0.1090261753\H,0.293999951,1.6  
195168533,-0.1096040587\C,-0.298099223,0.3864073717,1.5847337187\H,-1.  
3380983375,0.9320797529,-0.2489979078\H,0.722306486,0.1883837903,1.925  
5278551\H,-0.9087719685,-0.49849383,1.786255342\H,-0.7008344104,1.2247  
087435,2.1669308625\C1,0.3330548575,-0.6036777725,-0.9225100857\Ver  
sion=IA32L-G03RevC.02\State=1-A\HF=-539.4262582\RMSD=3.441e-09\RMSF=9.72  
4e-05\Dipole=-0.3081495,0.6165999,0.5671897\PG=C01 [X(C2H5C11)]\@

n.C1-CH\_CH3\_2

1\1\GINC-LC12\FOpt\RB3LYP\Gen\C3H7C11\CYL509\18-Jun-2008\0\#B3LYP/GEN  
6D INT (GRID=ULTRAFINE) OPT FREQ=NORAMAN MAXDISK=1342177280\C1-CH\_CH3  
\_2.freq\0,1\C,-1.1532027018,1.1871610258,0.2060363496\H,-0.8865952056  
,1.3831866323,1.2496643427\H,-2.2437526262,1.0826106018,0.1421773784\H  
, -0.8536024092,2.0491266222,-0.3963619915\C,-0.4941311808,-0.092615425  
, -0.2906773552\H,-0.7217061455,-0.2507271197,-1.3479124794\C,-0.866976  
4594,-1.3263828904,0.5203292612\H,-0.3673989572,-2.2205334568,0.137516  
4497\H,-1.9514106307,-1.4846368089,0.4631818189\H,-0.5925843198,-1.198  
7432426,1.5725091395\C1,1.3354654321,0.1194553241,-0.2608767172\Ver  
sion=IA32L-G03RevC.02\State=1-A\HF=-578.7436049\RMSD=2.968e-09\RMSF=2.25  
7e-05\Dipole=-0.9277363,-0.101048,0.0367694\PG=C01 [X(C3H7C11)]\@

n.C1-C\_CH3\_3

1\1\GINC-LC12\FOpt\RB3LYP\Gen\C4H9C11\CYL509\18-Jun-2008\0\#B3LYP/GEN  
6D INT (GRID=ULTRAFINE) OPT FREQ=NORAMAN MAXDISK=1342177280\C1-C\_CH3  
\_3.freq\0,1\C,-0.1393369681,-0.3725335291,1.6269961136\C,0.150882319,  
.2261260029,0.250501732\C,-0.5100356463,1.5935729069,0.0756272159\H,0.  
2945880498,0.272844982,2.4015623803\H,0.2998349163,-1.3696016984,1.723  
7375041\H,-1.2158943633,-0.4480553583,1.8049961589\C,1.6509191076,0.27  
95903615,-0.0401015839\H,2.1372001972,0.9437238848,0.6860002888\H,1.84  
4284095,0.6670172342,-1.0445346986\H,2.1041639989,-0.7123839964,0.0431  
22744\H,-0.0868364888,2.2963836027,0.8048052241\H,-1.5895323551,1.5337  
255585,0.2414018451\H,-0.3339282248,1.9910083,-0.928061259\C1,-0.60990  
89823,-0.9138351154,-1.0124218266\Version=IA32L-G03RevC.02\State=1-A\  
HF=-618.0595984\RMSD=3.297e-09\RMSF=1.299e-04\Dipole=0.3919406,0.58723  
83,0.6506037\PG=C01 [X(C4H9C11)]\@

n.C1-CCH

1\1\GINC-LC26\FOpt\RB3LYP\Gen\C2H1C11\CYL509\18-Jun-2008\0\#B3LYP/GEN  
6D INT (GRID=ULTRAFINE) OPT FREQ=NORAMAN MAXDISK=1342177280\C1-CCH.fr  
eq\0,1\C,-0.2222348776,-0.1109451205,-0.5668621324\C,-0.6550822704,-0  
.3270331921,-1.6709408388\H,-1.0378481863,-0.5181193578,-2.6472750026\  
C1,0.3706912396,0.1850581902,0.9455348724\Version=IA32L-G03RevC.02\St  
ate=1-SG\HF=-536.9132555\RMSD=2.599e-09\RMSF=1.608e-05\Dipole=-0.07754  
14,-0.0387106,-0.1977874\PG=C\*V [C\*(H1C1C11)]\@

n.C1-CH=C\_CH3\_2

1\1\GINC-LC12\FOpt\RB3LYP\Gen\C4H7C11\CYL509\18-Jun-2008\0\#B3LYP/GEN  
6D INT (GRID=ULTRAFINE) OPT FREQ=NORAMAN MAXDISK=1342177280\C1-CH=C\_C  
H3\_2.freq\0,1\C,-0.7515214401,-0.0475403104,0.2107819115\C,0.07459853  
6,-0.1920884817,-0.8290535898\H,-1.8215903728,-0.2043847248,0.14492558  
88\C,1.5631995091,0.015669998,-0.7801987461\C,-0.501136565,-0.59355199  
53,-2.166361914\H,-0.0546355577,-1.5344007519,-2.5154238488\H,-0.27821  
10012,0.1645862139,-2.929207509\H,-1.5865132806,-0.7268174322,-2.12709  
31767\H,1.8641311344,0.7956599629,-1.4923977318\H,2.087493197,-0.90199  
61506,-1.0788268008\H,1.9107151646,0.3034861184,0.2135761142\C1,-0.260  
7193838,0.4122900883,1.8337318468\Version=IA32L-G03RevC.02\State=1-A\  
HF=-616.8247988\RMSD=7.449e-09\RMSF=6.759e-05\Dipole=0.0281275,-0.1940  
422,-0.8119038\PG=C01 [X(C4H7C11)]\@

n.C1-CH=CH2

1\1\GINC-LC59\FOpt\RB3LYP\Gen\C2H3C11\CYL509\18-Jun-2008\0\#B3LYP/GEN  
6D INT (GRID=ULTRAFINE) OPT FREQ=NORAMAN MAXDISK=1342177280\C1-CH=CH2  
.freq\0,1\C,-0.4909310906,-0.1397785193,-0.5704890688\C,0.3174950737,  
-0.2852865718,-1.6130580654\H,-1.5709568244,-0.2191188719,-0.621170021  
1\H,1.3960138071,-0.2003951652,-1.532202611\H,-0.1057640812,-0.4979400  
728,-2.590419835\C1,0.0777248941,0.2039908622,1.0497103101\Version=IA  
32L-G03RevC.02\State=1-A\HF=-538.1853915\RMSD=1.882e-09\RMSF=4.316e-05  
\Dipole=-0.1687083,-0.1243877,-0.5985567\PG=C01 [X(C2H3C11)]\@

n.C1-CH=CHCH3

1\1\GINC-LC26\FOpt\RB3LYP\Gen\C3H5C11\CYL509\18-Jun-2008\0\#B3LYP/GEN

6D INT (GRID=ULTRAFINE) OPT FREQ=NORAMAN MAXDISK=1342177280\C1-CH=CHC  
H3.freq\0,1\C,-0.4335844219,0.1205055098,0.0473182646\C,0.3313041403,  
-0.2994659646,-0.9568148905\H,-1.4857988915,0.3647955529,-0.0507298972  
\H,1.3798672791,-0.5227117678,-0.7692600805\C,-0.1769098839,-0.4865938  
888,-2.3578915818\H,0.3783895985,0.1445983317,-3.0638823025\H,-1.23938  
60608,-0.2364549886,-2.4417373918\H,-0.0444749508,-1.5253549814,-2.687  
4750616\C1,0.1580320011,0.3393208185,1.6833772929\Version=IA32L-G03Re  
vC.02\State=1-A\HF=-577.5052656\RMSD=4.864e-09\RMSF=5.665e-05\Dipole=-  
0.1439205,-0.1422914,-0.7930114\PG=C01 [X(C3H5C11)]\@

n.C1-CHO

1\1\GINC-LC16\FOpt\RB3LYP\Gen\C1H1C1101\CYL509\18-Jun-2008\0\#B3LYP/G  
EN 6D INT (GRID=ULTRAFINE) OPT FREQ=NORAMAN MAXDISK=1342177280\C1-CHO.  
freq\0,1\C,-0.4166909112,-0.1706024567,-0.6706120316\O,0.3544902458,-  
0.3399215975,-1.5549419293\H,-1.511388475,-0.2302116748,-0.7296876664\  
C1,0.0691536456,0.2337175997,1.0113467818\Version=IA32L-G03RevC.02\St  
ate=1-A\HF=-574.116999\RMSD=4.216e-09\RMSF=3.397e-05\Dipole=-0.7342139  
, -0.023489,0.0326442\PG=C01 [X(C1H1C1101)]\@

n.C1-CN

1\1\GINC-LC151\FOpt\RB3LYP\Gen\C1C11N1\CYL509\18-Jun-2008\0\#B3LYP/GE  
N 6D INT (GRID=ULTRAFINE) OPT FREQ=NORAMAN MAXDISK=1342177280\C1-CN.fr  
eq\0,1\C,-0.2237508022,-0.1127673588,-0.6115493363\N,-0.6175298962,-0  
.3112266623,-1.6878151696\C1,0.3332478874,0.1679523993,0.9108236591\|V  
ersion=IA32L-G03RevC.02\State=1-SG\HF=-553.0082927\RMSD=2.718e-09\RMSF  
=1.668e-04\Dipole=0.3563427,0.1795919,0.9739458\PG=C\*V [C\*(N1C1C11)]\@

n.C1-COCH3

1\1\GINC-LC26\FOpt\RB3LYP\Gen\C2H3C1101\CYL509\18-Jun-2008\0\#B3LYP/G  
EN 6D INT (GRID=ULTRAFINE) OPT FREQ=NORAMAN MAXDISK=1342177280\C1-COCH  
3.freq\0,1\C,-0.1691825557,-0.0189636102,0.5158904758\C,1.1649369782,  
0.2326297337,1.1622405582\O,-1.2178906331,-0.1944191689,1.0439962589\H  
,1.5642297326,1.1933127833,0.8229448246\H,1.0415128271,0.2340401615,2.  
2473200786\H,1.8738003325,-0.5444676787,0.8604134524\C1,-0.0418202566,  
-0.0358546268,-1.3147902724\Version=IA32L-G03RevC.02\State=1-A\HF=-61  
3.4459163\RMSD=3.068e-09\RMSF=5.918e-05\Dipole=0.9860131,0.1871632,0.5  
320186\PG=C01 [X(C2H3C1101)]\@

n.C1-CON\_CH2CH3\_2

1\1\GINC-LC96\FOpt\RB3LYP\Gen\C5H10C11N101\CYL509\18-Jun-2008\0\#B3LY  
P/GEN 6D INT (GRID=ULTRAFINE) OPT FREQ=NORAMAN MAXDISK=1342177280\C1-C  
ON\_CH2CH3\_2.freq\0,1\C,-0.0025533137,0.3235592554,-0.9351006301\O,0.6  
133962266,0.2204495705,-1.9633072132\N,0.2687040365,-0.2832638933,0.24  
1230604\C,-0.466999757,-0.1150364636,1.5022324004\C,1.4372008277,-1.18  
66521412,0.2460213786\H,0.2727086064,-0.1944257417,2.3066289777\C,-1.5  
77788178,-1.1497225362,1.6937130715\H,-0.8731010339,0.8958493147,1.543  
2475019\H,1.477424616,-1.6883896442,-0.7229996408\H,1.2477483761,-1.94  
84899971,1.009065474\C,2.7512965166,-0.4544908398,0.5203344278\H,-2.34  
18574494,-1.0434811988,0.917964979\H,-2.0560462194,-1.0107218508,2.669  
8480712\H,-1.1838038105,-2.1713636321,1.6523246246\H,2.9476360554,0.27  
98502773,-0.2661697799\H,3.5826485073,-1.1682284133,0.5395781297\H,2.7  
27597815,0.0648182655,1.4850562375\C1,-1.496234712,1.3939935095,-0.898  
8179403\Version=IA32L-G03RevC.02\State=1-A\HF=-786.7479858\RMSD=6.629  
e-09\RMSF=9.532e-06\Dipole=0.3342876,-0.7578482,1.5474056\PG=C01 [X(C5  
H10C11N101)]\@

n.C1-CON\_CH3\_2

1\1\GINC-LC151\FOpt\RB3LYP\Gen\C3H6C11N101\CYL509\18-Jun-2008\0\#B3LY  
P/GEN 6D INT (GRID=ULTRAFINE) OPT FREQ=NORAMAN MAXDISK=1342177280\C1-C  
ON\_CH3\_2.freq\0,1\H,-1.600952582,1.6629844445,-1.7200217722\C,-1.7679  
738813,1.0408598563,-0.8324007262\N,-0.4854460687,0.703241961,-0.21245  
85158\H,-2.2793588375,0.1245809325,-1.1199688943\H,-2.38889778,1.60163  
38693,-0.1233233767\C,-0.1727331655,-0.611219179,-0.1087387319\O,-0.83  
59968914,-1.5457026463,-0.4720739273\C,0.3084225314,1.8444085936,0.223  
2016346\H,0.5303287422,2.4904669289,-0.6353231133\H,1.2425759321,1.518  
1205035,0.6716645775\H,-0.2567921337,2.4291295289,0.9596329734\C1,1.44  
89941978,-0.9428402582,0.6787510338\Version=IA32L-G03RevC.02\State=1-  
A\HF=-708.1148131\RMSD=3.151e-09\RMSF=1.954e-05\Dipole=-0.342933,1.680  
6408,-0.1045155\PG=C01 [X(C3H6C11N101)]\@

n.C1-CONH2

1\1\GINC-LC16\FOpt\RB3LYP\Gen\C1H2C11N101\CYL509\18-Jun-2008\0\#B3LYP  
/GEN 6D INT (GRID=ULTRAFINE) OPT FREQ=NORAMAN MAXDISK=1342177280\C1-CO  
NH2.freq\0,1\C,-0.113881255,-0.0193420525,0.5356098757\N,1.1117075823  
,0.2670352534,1.0216465461\O,-1.1173630994,-0.2408785531,1.1471000623\  
H,1.2273689655,0.3050207605,2.0248416205\H,1.8990082491,0.4373073027,0

.4162194138\C1,-0.0756551745,-0.0334408292,-1.2931203887\\Version=IA32L-G03RevC.02\State=1-A\HF=-629.4969904\RMSD=1.580e-09\RMSF=6.569e-05\Dipole=1.4379074,0.3331563,0.5371838\PG=C01 [X(C1H2C11N1O1)]\\@

n.C1-CONHCH3

1\1\GINC-AC27\FOpt\RB3LYP\Gen\C2H4C11N1O1\CYL509\20-Aug-2008\0\#B3LYP/GEN 6D INT (GRID=ULTRAFINE) OPT FREQ=NORAMAN MAXDISK=2684354560\C1-CO NHCH3.freq\0,1\C,-0.0926108307,-0.0045391925,0.3547675264\O,-0.087462 6505,0.0045163223,1.5530829726\N,0.9597418275,-0.0195633807,-0.4870157 194\H,0.7795286567,0.0343663089,-1.4784013523\C,2.3284321918,0.0537606 904,0.0083511827\H,2.3626120223,-0.3868883215,1.0057079744\H,2.6841337 003,1.0893520981,0.0670441996\H,2.9825627555,-0.5137092445,-0.65880901 54\C1,-1.6613092288,-0.0245668672,-0.5958710474\\Version=IA64L-G03RevC .02\State=1-A\HF=-668.8089245\RMSD=5.482e-09\RMSF=8.913e-05\Dipole=1.3 514197,0.049405,-0.9739459\PG=C01 [X(C2H4C11N1O1)]\\@

n.C1-COOC\_CH3\_3

1\1\GINC-LC48\FOpt\RB3LYP\Gen\C5H9C11O2\CYL509\18-Jun-2008\0\#B3LYP/G EN 6D INT (GRID=ULTRAFINE) OPT FREQ=NORAMAN MAXDISK=1342177280\C1-COOC \_CH3\_3.freq\0,1\C,-0.7369414816,0.4595387908,-0.6455103826\O,-0.15638 33144,0.82950876,-1.6239265542\O,-0.2928346619,-0.1571587041,0.4335398 65\C,1.1603380268,-0.5015117049,0.5646422241\C,1.5543646657,-1.4691724 965,-0.5519654174\C,1.1972890857,-1.1824529932,1.9321104068\C,1.988245 1485,0.7841708976,0.5583967299\H,2.2216191377,-1.4930693993,2.16221842 56\H,0.5547362626,-2.0681471735,1.942019282\H,0.8569793807,-0.49841960 63,2.7155091112\H,2.5820338528,-1.8102754112,-0.3858597759\H,1.5032505 228,-0.9922703306,-1.5325518405\H,0.9001075066,-2.3472021938,-0.547584 8196\H,3.0343669202,0.5389817984,0.7718423037\H,1.635380151,1.47168806 88,1.3341638821\H,1.9420519684,1.2862555082,-0.4097807654\C1,-2.506856 1508,0.7053072546,-0.4513484502\\Version=IA32L-G03RevC.02\State=1-A\HF =-806.6170804\RMSD=6.853e-09\RMSF=1.980e-05\Dipole=1.0824226,-0.570186 5,0.7346042\PG=C01 [X(C5H9C11O2)]\\@

n.C1-COOCH2CH3

1\1\GINC-LC72\FOpt\RB3LYP\Gen\C3H5C11O2\CYL509\18-Jun-2008\0\#B3LYP/G EN 6D INT (GRID=ULTRAFINE) OPT FREQ=NORAMAN MAXDISK=1342177280\C1-COOC H2CH3.freq\0,1\C,-0.206297747,0.2992492977,-0.6553595816\O,0.44116800 29,0.3899942148,-1.6561786134\O,0.1483823537,-0.2279523355,0.509176143 2\C,1.5084679944,-0.7607946195,0.5548076566\H,2.2010652931,0.050897426 9,0.314392078\H,1.5997687738,-1.5295013757,-0.2179077708\C,1.723049260 5,-1.3120658497,1.9491351493\H,2.7353080332,-1.7231806817,2.0262638207 \H,1.0080238969,-2.1105612483,2.1690839659\H,1.6106708749,-0.526617796 8,2.7025779478\C1,-1.8836798101,0.893193863,-0.5241111545\\Version=IA3 2L-G03RevC.02\State=1-A\HF=-727.9837096\RMSD=6.058e-09\RMSF=3.499e-05\ Dipole=0.787122,-0.5752137,0.8186855\PG=C01 [X(C3H5C11O2)]\\@

n.C1-COOCH3

1\1\GINC-LC71\FOpt\RB3LYP\Gen\C2H3C11O2\CYL509\18-Jun-2008\0\#B3LYP/G EN 6D INT (GRID=ULTRAFINE) OPT FREQ=NORAMAN MAXDISK=1342177280\C1-COOC H3.freq\0,1\C,0.3001703648,0.1069483167,-0.0338514548\O,1.4825890723, 0.1178001236,-0.2075194864\O,-0.5155282623,-0.9424558334,-0.0163886407 \C,0.1408670134,-2.213993766,-0.2383059373\H,0.6246048558,-2.221676465 8,-1.2175370304\H,-0.6574597548,-2.9534834274,-0.1932156909\H,0.884154 6721,-2.3946473818,0.5413397001\C1,-0.6608241484,1.5770191559,0.252566 023\\Version=IA32L-G03RevC.02\State=1-A\HF=-688.6639086\RMSD=3.354e-09 \RMSF=2.417e-05\Dipole=-0.2224462,-1.0996375,-0.0751567\PG=C01 [X(C2H3 C11O2)]\\@

n.C1-COOH

1\1\GINC-LC26\FOpt\RB3LYP\Gen\C1H1C11O2\CYL509\18-Jun-2008\0\#B3LYP/G EN 6D INT (GRID=ULTRAFINE) OPT FREQ=NORAMAN MAXDISK=1342177280\C1-COOH .freq\0,1\C,0.0769479602,0.0313141944,0.4970907536\O,1.0386553718,0.2 293290436,1.1759893418\O,-1.176874639,-0.1810606553,0.9157814778\H,-1. 1486752523,-0.1417415449,1.8914837261\C1,0.1054553899,-0.0254288663,-1 .2710702826\\Version=IA32L-G03RevC.02\State=1-A\HF=-649.354907\RMSD=8. 790e-09\RMSF=8.237e-05\Dipole=-0.6017903,-0.0894648,0.5578257\PG=C01 [ X(C1H1C11O2)]\\@

n.C1-COPh

1\1\GINC-LC76\FOpt\RB3LYP\Gen\C7H5C11O1\CYL509\18-Jun-2008\0\#B3LYP/G EN 6D INT (GRID=ULTRAFINE) OPT FREQ=NORAMAN MAXDISK=1342177280\C1-COPh .freq\0,1\C,-2.6118754656,-0.0079550708,-0.1030748385\C,-2.5843369816 , -0.0049550776,1.2946142584\C,-1.363035269,-0.0000292409,1.9718032657\ C,-0.1657412633,0.0019229863,1.2594131153\C,-0.1889687491,-0.001075650 8,-0.1423159398\C,-1.4211053212,-0.0060353557,-0.8211674663\C,1.024660 313,0.0006247697,-0.9933408259\O,1.0487814037,-0.0013488177,-2.1870045 108\H,-1.4226817118,-0.0083079313,-1.9057743269\H,0.7819698499,0.00574

72607,1.7842945674\H,-1.341655229,0.0023021323,3.0576280296\H,-3.56112  
03867,-0.0117850588,-0.6308627151\H,-3.5149471053,-0.0064579022,1.8555  
698232\C1,2.6194470456,0.0079004635,-0.0859063944\Version=IA32L-G03Re  
vC.02\State=1-A\HF=-805.1849693\RMSD=4.211e-09\RMSF=4.731e-05\Dipole=-  
1.3720612,-0.00252,0.9079965\PG=C01 [X(C7H5C1101)]\@

n.CH3-H

1\1\GINC-AC24\FOpt\RB3LYP\Gen\C1H4\CYL509\05-Apr-2008\0\#B3LYP/GEN 6D  
INT (GRID=ULTRAFINE) OPT FREQ=NORAMAN MAXDISK=1342177280\CH3-H.freq\  
0,1\C,0.,0.,0.\H,-0.0000003042,0.0000001907,1.0933912546\H,1.030859262  
2,0.0000000327,-0.3644634647\H,-0.5154293956,-0.8927503326,-0.36446373  
92\H,-0.5154295624,0.8927501093,-0.3644640506\Version=IA64L-G03RevC.0  
2\State=1-A\HF=-40.5183833\RMSD=6.431e-10\RMSF=4.407e-05\Dipole=0.,0.  
0.\PG=TD [O(C1),4C3(H1)]\@

n.CH3-BH2

1\1\GINC-AC27\FOpt\RB3LYP\Gen\C1H5B1\CYL509\05-Apr-2008\0\#B3LYP/GEN  
6D INT (GRID=ULTRAFINE) OPT FREQ=NORAMAN MAXDISK=1342177280\CH3-BH2.fr  
eq\0,1\C,0.2216494897,0.1824344811,0.621922372\H,1.2946348031,0.38960  
91838,0.6972815937\H,0.0463360637,-0.7259478453,1.2298603591\H,-0.3471  
256936,0.9819929249,1.1088775997\B,-0.2737110652,-0.1973697855,-0.8080  
761046\H,0.4624531936,-0.7164042343,-1.5989565713\H,-1.4176399787,-0.0  
370079881,-1.12821669\Version=IA64L-G03RevC.02\State=1-A\HF=-65.94666  
1\RMSD=4.422e-09\RMSF=5.097e-06\Dipole=0.0739019,0.0207136,0.2648932\PG  
=C01 [X(C1H5B1)]\@

n.CH3-CH3

1\1\GINC-AC1\FOpt\RB3LYP\Gen\C2H6\CYL509\05-Apr-2008\0\#B3LYP/GEN 6D  
INT (GRID=ULTRAFINE) OPT FREQ=NORAMAN MAXDISK=1342177280\CH3-CH3.freq\  
\0,1\H,0.2822963016,-0.3511507746,-1.4814500269\C,0.2797944825,-0.5824  
814779,-0.4099747294\H,1.311017458,-0.8151698924,-0.1201196126\H,-0.31  
59496779,-1.491801474,-0.2697339625\C,-0.2798281692,0.5824184887,0.409  
9788231\H,0.3149789029,1.4921958911,0.2681215418\H,-0.2805032566,0.352  
1208579,1.4816777655\H,-1.3116376078,0.8141833273,0.1214797321\Versio  
n=IA64L-G03RevC.02\State=1-A\HF=-79.8304206\RMSD=1.101e-09\RMSF=2.040e  
-05\Dipole=0.0000228,0.0000088,-0.0000143\PG=C01 [X(C2H6)]\@

n.CH3-NH2

1\1\GINC-AC2\FOpt\RB3LYP\Gen\C1H5N1\CYL509\07-Apr-2008\0\#B3LYP/GEN 6  
D INT (GRID=ULTRAFINE) OPT FREQ=NORAMAN MAXDISK=1342177280\CH3-NH2.fre  
q\0,1\C,0.2327427385,0.1332439419,0.652987302\H,1.3259746814,0.199384  
4458,0.6792172298\H,-0.0601148363,-0.6608088695,1.3486312443\H,-0.1703  
838983,1.0853016964,1.0416746944\N,-0.1928277048,-0.2339549171,-0.6999  
215149\H,-1.20935982,-0.2894533505,-0.735554401\H,0.0672213754,0.50379  
68456,-1.3524419757\Version=IA64L-G03RevC.02\State=1-A\HF=-95.8532062  
\RMSD=4.976e-09\RMSF=1.851e-05\Dipole=-0.2680732,0.5041698,0.0936696\PG  
=C01 [X(C1H5N1)]\@

n.CH3-OH

1\1\GINC-AC11\FOpt\RB3LYP\Gen\C1H4O1\CYL509\07-Apr-2008\0\#B3LYP/GEN  
6D INT (GRID=ULTRAFINE) OPT FREQ=NORAMAN MAXDISK=1342177280\CH3-OH.fre  
q\0,1\C,-0.0225076774,-0.0364037632,-0.6613583405\O,-0.023466076,-0.0  
460553763,0.7574749515\H,0.9936984255,-0.0434745329,-1.0856441251\H,-0  
.5683918944,0.8232159964,-1.0807293706\H,-0.5303712189,-0.9500274685,-  
0.9821664995\H,0.4278393605,0.7571515946,1.0568904264\Version=IA64L-G  
03RevC.02\State=1-A\HF=-115.7144057\RMSD=3.257e-09\RMSF=4.726e-05\Dipo  
le=0.2772331,0.495668,-0.3494451\PG=C01 [X(C1H4O1)]\@

n.CH3-F

1\1\GINC-AC24\FOpt\RB3LYP\Gen\C1H3F1\CYL509\05-Apr-2008\0\#B3LYP/GEN  
6D INT (GRID=ULTRAFINE) OPT FREQ=NORAMAN MAXDISK=1342177280\CH3-F.freq\  
\0,1\H,0.2250107228,-0.2237715069,-1.4008132976\C,0.2259127657,-0.483  
0442984,-0.3354805411\H,1.2510905262,-0.705324199,-0.0164832482\H,-0.4  
028637777,-1.3674923382,-0.177088697\F,-0.2698571186,0.5772059817,0.40  
08076097\Version=IA64L-G03RevC.02\State=1-A\HF=-139.7339157\RMSD=1.03  
4e-09\RMSF=1.195e-04\Dipole=0.2415928,-0.516621,-0.3587828\PG=C01 [X(C  
1H3F1)]\@

n.CH3-SiH3

1\1\GINC-AC19\FOpt\RB3LYP\Gen\C1H6Si1\CYL509\05-Apr-2008\0\#B3LYP/GEN  
6D INT (GRID=ULTRAFINE) OPT FREQ=NORAMAN MAXDISK=1342177280\CH3-SiH3.  
freq\0,1\H,0.6042320567,-1.0464936201,-1.5120490232\C,0.5896452789,-1  
.0212947333,-0.4169416595\H,1.6269655135,-1.0465260769,-0.0656042063\H  
,0.0927986196,-1.9322564375,-0.0656582033\Si,-0.3006882558,0.520806903  
7,0.2126184417\H,-1.7106289079,0.5521099501,-0.2666723592\H,-0.3187478  
216,0.5521345956,1.7016868159\H,0.3771444471,1.757503337,-0.2667112507  
\Version=IA64L-G03RevC.02\State=1-A\HF=-331.2108723\RMSD=7.186e-09\RM

SF=1.199e-05\Dipole=0.1516897,-0.262734,-0.1072606\PG=C03 [C3(C1Si1),X(H6)]\@

n.CH3-PH2

1\1\GINC-AC24\FOpt\RB3LYP\Gen\C1H5P1\CYL509\07-Apr-2008\0\#B3LYP\GEN 6D INT (GRID=ULTRAFINE) OPT FREQ=NORAMAN MAXDISK=1342177280\CH3-PH2.fr eq\0,1\C,-0.5683148254,0.9898873182,0.3666473545\H,0.1510309782,1.7517945247,0.6826951466\H,-1.2124220714,0.7687267922,1.2234209889\H,-1.1818181644,1.3963397834,-0.4413641386\P,0.3663047437,-0.5664715006,-0.1062285714\H,-0.720976263,-1.2565397534,-0.7182402006\H,0.8795033181,-0.1025727479,-1.3529673516\Version=IA64L-G03RevC.02\State=1-A\HF=-382.4577748\RMSD=5.469e-09\RMSF=1.610e-05\Dipole=-0.3293845,0.3709887,-0.1560742\PG=CS [SG(C1H1P1),X(H4)]\@

n.CH3-SH

1\1\GINC-AC24\FOpt\RB3LYP\Gen\C1H4S1\CYL509\05-Apr-2008\0\#B3LYP\GEN 6D INT (GRID=ULTRAFINE) OPT FREQ=NORAMAN MAXDISK=1342177280\CH3-SH.freq\0,1\C,0.329828014,0.2947706031,1.0779089523\H,1.4148829366,0.4124292451,1.123814636\H,0.0021478487,-0.461294262,1.7950251174\H,-0.1369681059,1.2481048785,1.3363958321\S,-0.2309060771,-0.1058464119,-0.6236566073\H,0.4354664694,-1.2743208899,-0.7441835819\Version=IA64L-G03RevC.02\State=1-A\HF=-438.6983423\RMSD=7.606e-09\RMSF=8.115e-06\Dipole=0.3672239,-0.1708446,0.5499149\PG=C01 [X(C1H4S1)]\@

n.CH3-C1

1\1\GINC-AC24\FOpt\RB3LYP\Gen\C1H3C11\CYL509\05-Apr-2008\0\#B3LYP\GEN 6D INT (GRID=ULTRAFINE) OPT FREQ=NORAMAN MAXDISK=1342177280\CH3-C1.freq\0,1\H,0.4032782554,-0.5921458858,-1.6616300541\C,0.4111697868,-0.8712830258,-0.6078476021\H,1.4298376382,-1.07392363,-0.2766529778\H,-0.22376772,-1.7412944652,-0.4398672834\C1,-0.239786288,0.5079448316,0.3544256427\Version=IA64L-G03RevC.02\State=1-A\HF=-500.1085334\RMSD=2.241e-09\RMSF=5.286e-05\Dipole=0.2959815,-0.6266538,-0.4373722\PG=C01 [X(C1H3C11)]\@

n.CH3-Br

1\1\GINC-AC27\FOpt\RB3LYP\Gen\C1H3Br1\CYL509\05-Apr-2008\0\#B3LYP\GEN 6D INT (GRID=ULTRAFINE) OPT FREQ=NORAMAN MAXDISK=1342177280\CH3-Br.freq\0,1\H,0.5450881132,-0.8872049211,-1.8725336704\C,0.5582973233,-1.1785786011,-0.8237959709\H,1.5744460099,-1.3702961291,-0.4837811193\H,-0.0827015589,-2.0407058746,-0.6485803435\Br,-0.1539033286,0.324847958,0.2270763132\Version=IA64L-G03RevC.02\State=1-A\HF=-2613.7955729\RMSD=8.329e-09\RMSF=4.669e-05\Dipole=0.2950393,-0.6225217,-0.4352365\PG=C01 [X(C1H3Br1)]\@

n.CH3-N\_CH3\_2

1\1\GINC-AC25\FOpt\RB3LYP\Gen\C3H9N1\CYL509\07-Apr-2008\0\#B3LYP\GEN 6D INT (GRID=ULTRAFINE) OPT FREQ=NORAMAN MAXDISK=1342177280\CH3-N\_CH3\_2.freq\0,1\C,0.6309694629,-0.0479964995,1.2378699908\H,1.7248755103,0.015283008,1.2357973162\H,0.3390381549,-0.8647513744,1.9074421443\H,0.2350403944,0.8980866197,1.6605513577\N,0.1522058273,-0.321528837,-0.1083733824\C,-1.2919848181,-0.4947347766,-0.1367614288\C,0.58603581,0.7011509797,-1.0477141649\H,-1.5798606603,-1.3116636521,0.534349429\H,-1.6131322084,-0.7586486099,-1.1505887823\H,-1.8490216656,0.4134006807,0.172322105\H,1.6799597954,0.7640575605,-1.0469562961\H,0.1858883136,1.7091671296,-0.8146768634\H,0.2616488454,0.4352522752,-2.0599931153\Version=IA64L-G03RevC.02\State=1-A\HF=-174.4744033\RMSD=1.388e-09\RMSF=1.068e-05\Dipole=-0.0926285,0.1954838,0.0658847\PG=C01 [X(C3H9N1)]\@

n.CH3-NHCH3

1\1\GINC-AC2\FOpt\RB3LYP\Gen\C2H7N1\CYL509\07-Apr-2008\0\#B3LYP\GEN 6D INT (GRID=ULTRAFINE) OPT FREQ=NORAMAN MAXDISK=1342177280\CH3-NHCH3.freq\0,1\C,0.8373621362,0.2405194459,0.8735800623\H,1.9278042334,0.3401230919,0.850710369\H,0.5907306021,-0.5543118724,1.5882632911\H,0.4109866805,1.1835296623,1.2677945497\N,0.3518696027,-0.1341564229,-0.4481741069\C,-1.1017347834,-0.2107035977,-0.513764155\H,-1.4502181784,-1.029131709,0.1281755775\H,-1.412599271,-0.43733262,-1.5391929074\H,-1.6240643687,0.7100291033,-0.1883205148\H,0.6805089665,0.5472942152,-1.1291070604\Version=IA64L-G03RevC.02\State=1-A\HF=-135.1628563\RMSD=2.072e-09\RMSF=1.380e-05\Dipole=-0.100408,0.391435,0.0130459\PG=C01 [X(C2H7N1)]\@

n.CH3-NHCHO

1\1\GINC-AC25\FOpt\RB3LYP\Gen\C2H5N1O1\CYL509\07-Apr-2008\0\#B3LYP\GEN 6D INT (GRID=ULTRAFINE) OPT FREQ=NORAMAN MAXDISK=1342177280\CH3-NHCHO.freq\0,1\C,-0.0913365543,-0.4110003383,1.4548678243\H,0.9538962324,-0.1270843243,1.3250566119\H,-0.1410506705,-1.4569335617,1.7795984681\H,-0.5413200921,0.2219888319,2.2286559929\N,-0.7502092551,-0.225393887

4,0.1734899204\H,-1.7345023037,-0.437983103,0.0907050695\C,-0.10036939  
36,0.2263407607,-0.9355531248\O,1.0805208288,0.5234890044,-0.993237000  
6\H,-0.7794893241,0.2978147993,-1.8084377774\Version=IA64L-G03RevC.02  
\State=1-A\HF=-209.2004279\RMSD=4.548e-09\RMSF=3.145e-06\Dipole=-1.284  
2945,-0.4713998,0.6169694\PG=C01 [X(C2H5N1O1)]\@

n.CH3-NHCOCH3

1\1\GINC-AC25\FOpt\RB3LYP\Gen\C3H7N1O1\CYL509\07-Apr-2008\0\#B3LYP/GE  
N 6D INT (GRID=ULTRAFINE) OPT FREQ=NORAMAN MAXDISK=1342177280\CH3-NHCO  
CH3.freq\0,1\C,0.3274798799,-0.9948528606,1.6781220184\H,1.305319446,  
-0.5165222938,1.6056818645\H,0.459318403,-2.0836870188,1.6789005843\H,  
-0.1495055756,-0.696569268,2.6196449692\N,-0.4476575007,-0.5577828448,  
0.5319530962\H,-1.3908867688,-0.9002740936,0.426395989\C,0.0505105704,  
0.3009214844,-0.4107949169\O,1.1830425296,0.764152592,-0.3602615661\C,  
-0.9070332428,-0.6485046922,-1.5427347508\H,-0.4460438468,0.3631565888,  
-2.4932977714\H,-1.0487533994,1.7334151116,-1.5627085455\H,-1.88592923  
58,0.1643002554,-1.4637503391\Version=IA64L-G03RevC.02\State=1-A\HF=-  
248.5235631\RMSD=2.275e-09\RMSF=2.080e-06\Dipole=-1.2245759,-0.7017669  
,0.2417766\PG=C01 [X(C3H7N1O1)]\@

n.CH3-NO2

1\1\GINC-AC29\FOpt\RB3LYP\Gen\C1H3N1O2\CYL509\05-Apr-2008\0\#B3LYP/GE  
N 6D INT (GRID=ULTRAFINE) OPT FREQ=NORAMAN MAXDISK=1342177280\CH3-NO2.  
freq\0,1\H,0.5379650314,-0.6195690809,-1.7586975281\C,0.5516536625,-0  
.9643410662,-0.7220822824\H,1.5763342561,-1.1027280531,-0.3817277338\H  
, -0.0539260152,-1.8622821246,-0.6128230525\N,-0.0707606588,0.120063238  
6,0.1045618431\O,0.677720125,0.9908489403,0.5363724926\O,-1.2870914549  
,0.0754239327,0.2578536457\Version=IA64L-G03RevC.02\State=1-A\HF=-245  
.0093321\RMSD=2.841e-09\RMSF=6.698e-05\Dipole=0.5669415,-0.9855271,-0.  
7602955\PG=C01 [X(C1H3N1O2)]\@

n.CH3-OCF3

1\1\GINC-AC24\FOpt\RB3LYP\Gen\C2H3F3O1\CYL509\07-Apr-2008\0\#B3LYP/GE  
N 6D INT (GRID=ULTRAFINE) OPT FREQ=NORAMAN MAXDISK=1342177280\CH3-OCF3  
.freq\0,1\C,-1.0892492068,-0.0814840395,-1.6200890318\O,-0.797674315,  
0.5819587208,-0.3784100316\C,0.2034289736,0.048342946,0.3442854116\F,1  
.3813982203,0.0474790468,-0.3221746906\F,-0.0381808949,-1.235875685,0.  
6966894836\F,0.3483274803,0.7700017417,1.4551596899\H,-0.2200250546,-0  
.0545797676,-2.2834246226\H,-1.3949211636,-1.1161498323,-1.4403162162\H  
, -1.9126411137,0.479460464,-2.0612275333\Version=IA64L-G03RevC.02\St  
ate=1-A\HF=-452.7654984\RMSD=2.148e-09\RMSF=8.623e-05\Dipole=-0.393321  
5,-0.2009527,-0.801015\PG=C01 [X(C2H3F3O1)]\@

n.CH3-OCH2CH3

1\1\GINC-AC28\FOpt\RB3LYP\Gen\C3H8O1\CYL509\07-Apr-2008\0\#B3LYP/GEN  
6D INT (GRID=ULTRAFINE) OPT FREQ=NORAMAN MAXDISK=1342177280\CH3-OCH2CH  
3.freq\0,1\C,-1.7265935923,0.4365942314,0.3377971338\H,-2.0504344629,  
0.7704084454,-0.6620716979\H,-1.5899063884,1.3300549413,0.9695632281\H  
, -2.5116052282,-0.1874255326,0.7735714981\O,-0.5556533466,-0.346197154  
4,0.2757549969\C,0.5439331033,0.356030615,-0.2760344386\C,1.7470901796  
, -0.5724107409,-0.2967811265\H,0.7596250111,1.257427513,0.3244233897\H  
, 0.3017463505,0.7003467494,-1.2970062257\H,2.6193413419,-0.0611599758,  
-0.7187928529\H,1.5360738301,-1.4591518827,-0.9032151891\H,1.993808174  
8,-0.9022076558,0.7175984626\Version=IA64L-G03RevC.02\State=1-A\HF=-1  
94.3442992\RMSD=4.755e-09\RMSF=3.859e-05\Dipole=-0.0065044,0.4269246,-  
0.1447386\PG=C01 [X(C3H8O1)]\@

n.CH3-OCH3

1\1\GINC-AC11\FOpt\RB3LYP\Gen\C2H6O1\CYL509\07-Apr-2008\0\#B3LYP/GEN  
6D INT (GRID=ULTRAFINE) OPT FREQ=NORAMAN MAXDISK=1342177280\CH3-OCH3.f  
req\0,1\C,-0.4899387354,0.0034990738,-1.0812806275\O,-0.4905709788,0.  
0026778129,0.3291236237\C,0.8146986091,-0.0052749263,0.8633984397\H,0.  
0057810252,-0.8921477998,-1.4913405983\H,-1.5338450974,0.0102183377,-1  
.4063910968\H,0.0169426886,0.8933601465,-1.4902856364\H,1.3784805323,-  
0.9012430478,0.5544306152\H,0.7196468783,-0.0052228302,1.9526402693\H,  
1.3890025618,0.8842678048,0.555250584\Version=IA64L-G03RevC.02\State=  
1-A\HF=-155.0250508\RMSD=8.051e-09\RMSF=1.247e-04\Dipole=0.4173848,-0.  
0022503,-0.2800236\PG=C01 [X(C2H6O1)]\@

n.CH3-OCHO

1\1\GINC-AC29\FOpt\RB3LYP\Gen\C2H4O2\CYL509\07-Apr-2008\0\#B3LYP/GEN  
6D INT (GRID=ULTRAFINE) OPT FREQ=NORAMAN MAXDISK=1342177280\CH3-OCHO.f  
req\0,1\C,-1.3685435718,-0.3990834186,-0.0052996195\O,-0.4774432927,0  
.7328594798,0.0032456334\C,0.8304841127,0.4320943216,0.0044203863\O,1.  
3029277834,-0.678117019,-0.001187994\H,-1.2080916184,-1.0177459476,0.8  
814136485\H,-1.204943786,-1.0063521312,-0.8993099362\H,-2.3740882143,0  
.0212881877,-0.0042778274\H,1.4116044481,1.3668047864,0.0109883989\Ve



rsion=IA64L-G03RevC.02\State=1-A\HF=-229.0630092\RMSD=7.982e-09\RMSF=6.826e-05\Dipole=-0.6595265,0.3001289,0.0004366\PG=C01 [X(C2H4O2)]\@

n.CH3-OCOCH3

1\1\GINC-AC26\FOpt\RB3LYP\Gen\C3H6O2\CYL509\07-Apr-2008\0\#B3LYP/GEN 6D INT (GRID=ULTRAFINE) OPT FREQ=NORAMAN MAXDISK=1342177280\CH3-OCOCH3 .freq\0,1\C,-0.8804257779,0.0598136811,-1.6590154362\O,-0.8757360389,0.0968789209,-0.2229866054\C,0.3426526247,-0.0303463886,0.3541209644\C,0.2307348566,0.0203668591,1.8601684801\O,1.3685768249,-0.1662848251,-0.2748628539\H,-0.2754618584,0.8738528514,-2.0675180958\H,-0.4822665314,-0.8919040107,-2.0212820545\H,-1.9246950009,0.1744455643,-1.9515394513\H,1.2236854855,-0.0737014734,2.3008031958\H,-0.4131363964,-0.7901040633,2.2174504168\H,-0.2286222068,0.9636534554,2.1732376134\Version=IA64L-G03RevC.02\State=1-A\HF=-268.388484\RMSD=6.367e-09\RMSF=3.136e-05\Dipole=-0.6821362,0.0816115,0.1352391\PG=C01 [X(C3H6O2)]\@

n.CH3-Si\_CH3\_3

1\1\GINC-AC25\FOpt\RB3LYP\Gen\C4H12Si1\CYL509\05-Apr-2008\0\#B3LYP/GEN 6D INT (GRID=ULTRAFINE) OPT FREQ=NORAMAN MAXDISK=1342177280\CH3-Si\_C H3\_3.freq\0,1\H,0.9123922966,-1.5813407482,-1.7282637361\C,0.89349911,-1.5476843555,-0.6319087206\H,1.9337240459,-1.5808878418,-0.2850529517\H,0.4026938003,-2.465152341,-0.2842811424\Si,-0.0000139699,0.0000252714,0.0000161\C,-1.7871729994,0.0000405237,-0.6317975903\C,0.0000388678,-0.0000546186,1.8955732663\C,0.893642085,1.5476752889,-0.6318875812\H,-1.8257813505,0.0004613189,-1.7281484588\H,-2.3362833972,0.8838570577,-0.2841919891\H,-2.3360500585,-0.884194417,-0.2848915348\H,1.933443552,1.5815185025,-0.2838240163\H,0.402075982,2.4651974619,-0.2854903476\H,0.9138204216,1.5805630668,-1.7282404022\H,1.0208259185,-0.0000982052,2.2974160325\H,-0.5103842448,-0.8840877459,2.2973623876\H,-0.5103237666,0.8839490607,2.2975045134\Version=IA64L-G03RevC.02\State=1-A\HF=-449.1916976\RMSD=4.752e-09\RMSF=1.721e-04\Dipole=0.0000112,0.0000303,0.0000336\PG=C01 [X(C4H12Si1)]\@

n.CH3-P\_CH3\_2

1\1\GINC-AC26\FOpt\RB3LYP\Gen\C3H9P1\CYL509\05-Apr-2008\0\#B3LYP/GEN 6D INT (GRID=ULTRAFINE) OPT FREQ=NORAMAN MAXDISK=1342177280\CH3-P\_CH3\_2.freq\0,1\C,-0.6172245734,1.3106163547,0.8253616504\H,0.0732110323,2.1046517271,1.1300297944\H,-1.2939826874,1.1206613013,1.6655694387\H,-1.2083381592,1.6677666107,-0.027371338\H,0.3462371766,-0.2407440985,0.4349428439\C,-1.0311738668,-1.2803547567,-0.278741117\C,1.1670130972,0.3044664264,-1.1514016051\H,-0.6140193398,-2.1981244297,-0.7073568574\H,-1.5979293585,-0.7553074805,-1.0580047728\H,-1.7218155533,-1.5726939561,0.5197464935\H,1.9270526469,1.0616504027,-0.9299367481\H,0.4552822198,0.7228347966,-1.874269392\H,1.6752936075,-0.5486456416,-1.613862846\Version=IA64L-G03RevC.02\State=1-A\HF=-461.0984129\RMSD=5.701e-09\RMSF=5.926e-06\Dipole=-0.3031785,0.2107677,-0.3809246\PG=C01 [X(C3H9P1)]\@

n.CH3-SC\_CH3\_2CN

1\1\GINC-SC24\FOpt\RB3LYP\6-31G(d)\C5H9N1S1\MLC501\23-Sep-2002\0\#N B 3LYP/6-31G(D) OPT=(MAXCYC=100) FREQ MAXDISK=52428800 GEOM=CHECK\ch3sc me2cn-clb2-6dub3\0,1\C,2.0004608618,0.9668672623,0.3091125322\H,1.9999993174,0.9636095319,1.402206942\H,3.036058107,0.9668243234,-0.0412801942\S,1.2416814904,-0.5438703598,-0.3838305371\C,-0.5503501855,-0.3539747574,0.1076597413\C,-0.7388086095,-0.429265126,1.635054428\C,-1.3023225301,-1.501267512,-0.5974700784\C,-1.035494258,0.9424549998,-0.3884977241\H,-0.3703085291,-1.3927528237,1.9987089375\H,-0.1981988796,0.3700798125,2.1489303456\H,-1.8009991951,-0.3359079691,1.8893357496\H,-1.1916771354,-1.4397566369,-1.6831554124\H,-2.3679363761,-1.4558307861,-0.3504707881\H,-0.906511597,-2.4628171846,-0.2554545166\N,-1.4011523275,1.9824019672,-0.7563977594\H,1.4998250629,1.8627745195,-0.0679015481\Version=DEC-AXP-OSF/1-G98RevA.11.3\HF=-648.8781177\RMSD=8.129e-09\RMSF=4.157e-06\Dipole=0.2984912,-0.8362157,0.8124852\PG=C01 [X(C5H9N1S1)]\@

n.CH3-SCH2COOCH3

1\1\GINC-SC28\FOpt\RB3LYP\6-31G(d)\C4H8O2S1\MLC501\20-Sep-2002\1\#N B 3LYP/6-31G(D) OPT=(Z-MATRIX,MAXCYC=100) FREQ MAXDISK=52428800 GEOM=CHECK\ch3sch2co2ch3-clp-6dub3\0,1\S\C,1,B1\H,2,B2,1,A1\H,2,B3,1,A2,3,D1,0\C,1,B4,2,A3,3,D2,0\C,5,B5,1,A4,2,D3,0\O,6,B6,5,A5,1,D4,0\O,6,B7,5,A6,7,D5,0\C,8,B8,6,A7,5,D6,0\H,5,B9,1,A8,6,D7,0\H,5,B10,1,A9,6,D8,0\H,9,B11,8,A10,6,D9,0\H,9,B12,8,A11,12,D10,0\H,9,B13,8,A12,12,D11,0\H,2,B14,1,A13,4,D12,0\B14=1.09407907\A13=110.98917864\D12=-122.32599148\B1=1.82941218\B2=1.09320983\B3=1.09179061\B4=1.84120939\B5=1.51326922\B6=1.21430186\B7=1.34788275\B8=1.43778776\B9=1.09325654\B10=1.09174033\B11=1.09310389\B12=1.09323525\B13=1.09017352\A1=106.45059106\A2=110.8007717\A3=100.17137515\A4=111.04905442\A5=124.57420924\A6=111.47577278\A7

=115.34918093\A8=109.61040514\A9=106.06955231\A10=110.56850432\A11=110.39708436\A12=105.51426102\D1=-119.0645737\D2=175.11314455\D3=-70.7090079\D4=81.86780755\D5=-178.35716699\D6=176.4774588\D7=120.89987776\D8=-120.6551676\D9=59.44174906\D10=-120.72743755\D11=119.73808134\Version=DEC-AXP-OSF/1-G98RevA.11.3\HF=-705.8848169\RMSD=7.903e-09\RMSF=2.103e-05\Dipole=-0.2739871,-0.1599817,-0.1633175\PG=C01 [X(C4H8O2S1)]\@

n.CH3-SCH2Ph

1\1\GINC-SC29\FOpt\RB3LYP\6-31G(d)\C8H10S1\MLC501\29-Jan-2003\0\#N B3LYP/6-31G(D) OPT(MAXCYC=100) FREQ MAXDISK=39321600 GEOM=CHECK GUESS=READ\CH3SB2 (based on clcy)//B3\0,1\C,2.2716097518,1.1121065137,-0.9973390939\S,2.4284127182,-0.4787724374,-0.1153723018\C,1.0853222086,-0.2985429716,1.1422050296\H,1.2732481361,1.2266499171,-1.4278935723\H,3.0083318311,1.0980264415,-1.804834343\C,-0.3064073801,-0.1601063939,0.5740714721\H,1.3243469567,0.5507382422,1.7912300283\H,1.1749078686,-1.2073821913,1.7469281007\C,-0.9937221494,1.0564749042,0.6650093261\C,-0.9397240463,-1.2425042601,-0.0546658397\C,-2.2834744781,1.1918881437,0.1448090955\C,-2.2266742838,-1.1118376907,-0.5716986532\C,-2.9038127115,0.1075313971,-0.4741765207\H,-3.9076158778,0.2087023447,-0.8780254106\H,-2.7042121176,-1.962380853,-1.0511911286\H,-2.8009101292,2.1443024456,0.2259204072\H,-0.4126995505,-2.1894404946,-0.1430459346\H,-0.5176641431,1.9038244544,1.1539361163\H,2.488962066,1.9572608373,-0.3363563295\Version=DEC-AXP-OSF/1-G98RevA.11.3\HF=-709.0645592\RMSD=4.540e-09\RMSF=5.598e-06\Dipole=-0.4507539,0.4538128,0.0558314\PG=C01 [X(C8H10S1)]\@

n.CH3-SCH3

1\1\GINC-SC32\FOpt\RB3LYP\6-31G(d)\C2H6S1\MLC501\16-Mar-2004\0\# B3LYP/6-31G\* OPT FREQ MAXDISK=65536000\CH3SCH3-geom-6dub3\0,1\S,-0.3697821769,-0.5514550776,0.\C,1.4449112088,-0.3482525121,0.\C,-0.8707345203,1.2045205438,0.\H,1.8814896329,-1.3505755523,0.\H,-1.9637607463,1.2278848837,0.\H,1.785254922,0.1830801241,0.8945611212\H,-0.5083920151,1.721101736,0.8945611186\H,1.785254922,0.1830801241,-0.8945611212\H,-0.5083920151,1.721101736,-0.8945611186\Version=DEC-AXP-OSF/1-G03RevB.03\State=1-A\HF=-478.0138083\RMSD=4.490e-09\RMSF=3.553e-05\Dipole=0.3773484,0.5627385,0.\PG=CS [SG(C2H2S1),X(H4)]\@

n.CH3-SO2CH3

1\1\GINC-AC25\FOpt\RB3LYP\Gen\C2H6O2S1\CYL509\05-Apr-2008\0\#B3LYP/GEN 6D INT (GRID=ULTRAFINE) OPT FREQ=NORAMAN MAXDISK=1342177280\CH3-SO2CH3.freq\0,1\C,-0.5693464435,-1.4882201784,-0.5811886756\S,-0.069303979,0.0848752568,0.1612097726\C,1.227989534,0.6817367339,-0.9507725321\O,-1.2071536857,1.0105358861,0.062518508\O,0.5522585167,-0.2086078218,1.4607548021\H,2.0565938955,-0.0294479748,-0.9636026922\H,1.5616507837,1.6367294395,-0.5379488086\H,0.8147584878,0.8310526665,-1.9505116709\H,0.2810444895,-2.1731259033,-0.5985765865\H,-0.9607486664,-1.312654425,-1.5854515336\H,-1.3571325171,-1.8870817594,0.0623156952\Version=IA64L-G03RevC.02\State=1-A\HF=-628.4008216\RMSD=8.678e-09\RMSF=1.791e-05\Dipole=0.6444631,-0.7891339,-1.4989924\PG=C01 [X(C2H6O2S1)]\@

n.CH3-SOCH3

1\1\GINC-AC7\FOpt\RB3LYP\Gen\C2H6O1S1\CYL509\11-Apr-2008\0\#B3LYP/GEN 6D INT (GRID=ULTRAFINE) OPT FREQ=NORAMAN MAXDISK=1342177280\CH3-SOCH3.bl.freq\0,1\H,0.5011333965,1.1134772663,-1.6152834588\C,0.703141249,1.3258550683,-0.5611813272\H,1.7799391642,1.4339084427,-0.4104052859\H,0.1905120969,2.2380020504,-0.2403112153\S,0.1570310499,-0.0958184515,0.467155375\O,0.7771757481,-1.3442953328,-0.1168188472\C,-1.6000412927,-0.0484626761,-0.0688693757\H,-2.1056201907,-0.8846195384,0.4201443011\H,-1.6544944198,-0.1727940147,-1.154511758\H,-2.0599725682,0.8951293284,0.2407364122\Version=IA64L-G03RevC.02\State=1-A\HF=-553.1869341\RMSD=5.114e-09\RMSF=1.127e-05\Dipole=-0.7995656,1.3212387,-0.0522912\PG=CS [SG(O1S1),X(C2H6)]\@

n.CH3-Ph

1\1\GINC-AC28\FOpt\RB3LYP\Gen\C7H8\CYL509\07-Apr-2008\0\#B3LYP/GEN 6D INT (GRID=ULTRAFINE) OPT FREQ=NORAMAN MAXDISK=1342177280\CH3-Ph.freq\0,1\C,0.8370875263,0.4312198302,2.2352514059\H,1.922021,0.6018739263,2.2178876395\H,0.6531340685,-0.4134973976,2.9078264328\H,0.3765159687,1.3215844198,2.6766899025\C,0.3018642167,0.1610210578,0.8474806067\C,-0.6431077018,-0.3371566985,-1.7612937383\C,-0.1294726256,1.2108443571,0.0256885811\C,0.2458969242,-1.1436564459,0.3393401996\C,-0.2201696899,-1.3930929008,-0.9522027675\C,-0.596481269,0.9673169011,-1.2666414937\H,-0.1004950958,2.2306000596,0.4040615462\H,0.569753954,-1.9735289326,0.9641087752\H,-0.2569032036,-2.4138084342,-1.3245636571\H,-0.928254513,1.797234492,-1.8855320033\H,-1.0094764249,-0.529434739,-2.7662153991\Version=IA64L-G03RevC.02\State=1-A\HF=-271.5666377\RMSD=7.836e-09\RMSF=2.415e-05\Dipole=0.0559009,0.0235781,0.1100932\PG=C01 [X(C7H8)]\@

@

n.CH3-C6H4CN

```
1\1\GINC-AC28\FOpt\RB3LYP\Gen\C8H7N1\CYL509\07-Apr-2008\0\#B3LYP/GEN
6D INT (GRID=ULTRAFINE) OPT FREQ=NORAMAN MAXDISK=1342177280\CH3-C6H4CN
.freq\0,1\C,1.1540637282,0.5741186195,2.9352620447\H,2.2519353185,0.5
912248458,2.9158835196\H,0.8536777139,-0.1996203433,3.6491940984\H,0.8
207707334,1.5428706005,3.3213323433\C,0.5940997475,0.3046799724,1.5594
729852\C,-0.3981390926,-0.2011319518,-1.0291522532\C,0.316866808,1.358
4820383,0.6765886322\C,0.3596393375,-1.0071307044,1.1224335261\C,-0.12
86785717,-1.2661377843,-0.1539345037\C,-0.1717836213,1.1180541811,-0.6
032751198\H,0.4851364921,2.3833456904,0.9978274811\H,0.5614692816,-1.8
382877032,1.7934734734\H,-0.3074414831,-2.2861266671,-0.4790271438\H,-
0.3839006735,1.9429090631,-1.2760610148\C,-0.9048484622,-0.4583687425,
-2.3452216143\N,-1.3155666605,-0.6673870366,-3.4136664201\Version=IA6
4L-G03RevC.02\State=1-A\HF=-363.811129\RMSD=4.310e-09\RMSF=2.055e-06\D
ipole=0.7295346,0.3610479,1.8446661\PG=C01 [X(C8H7N1)]\@
```

n.CH3-C6H4NO2

```
1\1\GINC-AC25\FOpt\RB3LYP\Gen\C7H7N1O2\CYL509\07-Apr-2008\0\#B3LYP/GE
N 6D INT (GRID=ULTRAFINE) OPT FREQ=NORAMAN MAXDISK=1342177280\CH3-C6H4
NO2.freq\0,1\C,1.2257979093,0.634562304,3.2964905395\H,2.3105244171,0
.8040258582,3.2704357455\H,1.0450434315,-0.2109312357,3.9678535732\H,0
.7680811976,1.5263070931,3.7364297259\C,0.6910299555,0.3647873724,1.91
13572401\C,-0.2456731711,-0.1281947049,-0.6683087123\C,0.2589526341,1.
4178902698,1.0904204314\C,0.6353259713,-0.9429063361,1.404910888\C,0.1
710690208,-1.2001109514,0.1188657536\C,-0.2089327707,1.1834451978,-0.1
986565691\H,0.2879876237,2.4368935671,1.467559427\H,0.9590579739,-1.77
23861494,2.0282931167\H,0.1228303337,-2.2059079522,-0.2799159995\H,-0.
5460148108,1.9894140771,-0.8387904225\N,-0.740650033,-0.3880115817,-2.
0263112192\O,-1.1032011661,0.5781761666,-2.6983324546\O,-0.7628459878,
-1.5566978036,-2.4139380528\Version=IA64L-G03RevC.02\State=1-A\HF=-47
6.0696457\RMSD=8.613e-09\RMSF=8.752e-05\Dipole=0.7075901,0.3640844,1.8
862635\PG=C01 [X(C7H7N1O2)]\@
```

n.CH3-C6H4OCH3

```
1\1\GINC-AC26\FOpt\RB3LYP\Gen\C8H10O1\CYL509\07-Apr-2008\0\#B3LYP/GEN
6D INT (GRID=ULTRAFINE) OPT FREQ=NORAMAN MAXDISK=1342177280\CH3-C6H4O
CH3.freq\0,1\C,-0.9744537048,-0.0476318403,-0.9819541032\C,-0.9155034
449,-0.0098185008,0.4195567308\C,0.3295587119,0.0349823694,1.051978067
7\C,1.4963975772,0.0414065023,0.2786937443\C,1.4589980319,0.0042711032
,-1.1156962348\C,0.1951762476,-0.0404531881,-1.7292410555\C,2.72373376
51,0.0115385436,-1.9430707741\O,-2.1215407814,-0.0204143068,1.06514925
32\C,-2.1191187748,0.0157234004,2.4818296613\H,2.8014621641,-0.8852755
695,-2.5709994032\H,3.6147175654,0.0480782831,-1.3078567087\H,2.761596
1876,0.8774036359,-2.6164653395\H,0.1283555699,-0.0702349486,-2.814969
0431\H,2.4581466789,0.0764990443,0.7860263142\H,0.4084392774,0.0649351
914,-2.1329182506\H,-1.9491972466,-0.0822443621,-1.4590389604\H,-1.6054
859504,-0.856463496,2.9085857745\H,-3.1678422911,-0.0006589297,2.78495
54749\H,-1.6465961593,0.9311652665,2.863073396\Version=IA64L-G03RevC.
02\State=1-A\HF=-386.0887974\RMSD=6.789e-09\RMSF=1.794e-05\Dipole=0.16
94823,0.0144961,0.4220463\PG=C01 [X(C8H10O1)]\@
```

n.CH3-C6H4OH

```
1\1\GINC-AC24\FOpt\RB3LYP\Gen\C7H8O1\CYL509\07-Apr-2008\0\#B3LYP/GEN
6D INT (GRID=ULTRAFINE) OPT FREQ=NORAMAN MAXDISK=1342177280\CH3-C6H4OH
.freq\0,1\C,-1.2476636726,-0.0702393146,-0.6763194152\C,-1.2487487545
,-0.0043113748,0.7217382411\C,-0.0359789763,0.0658881736,1.4097170004\
C,1.1669497763,0.0696556224,0.6996266378\C,1.1922721651,0.0042653113,-
0.6963002282\C,-0.0399801846,-0.0653638618,-1.3658553815\C,2.494480472
6,0.0062156904,-1.4639031819\O,-2.4643304638,-0.0120096721,1.353901703
9\H,3.3535335979,0.0854515155,-0.7898038762\H,2.5477505078,0.846171527
1,-2.1681313473\H,2.619207491,-0.9123962638,-2.0514958541\H,-0.0541886
181,-0.1167899141,-2.452688234\H,2.1032565564,0.1250341176,1.250428140
8\H,-0.0274577399,0.1179484311,2.4974326954\H,-2.1968954097,-0.1240196
647,-1.2004361761\H,-2.3185476304,0.0380161489,2.3112589846\Version=I
A64L-G03RevC.02\State=1-A\HF=-346.7822401\RMSD=8.952e-09\RMSF=1.008e-0
5\Dipole=0.3380928,0.0284806,0.3930471\PG=C01 [X(C7H8O1)]\@
```

n.CH3-CF2CF3

```
1\1\GINC-AC25\FOpt\RB3LYP\Gen\C3H3F5\CYL509\05-Apr-2008\0\#B3LYP/GEN
6D INT (GRID=ULTRAFINE) OPT FREQ=NORAMAN MAXDISK=1342177280\CH3-CF2CF3
.freq\0,1\F,-0.7433845018,0.0994767838,-1.5840848079\C,-0.730369159,0
.0086712347,-0.2210437773\C,0.7498207213,0.0176611661,0.2118993003\C,-
1.507711401,-1.2028987418,0.2334559497\F,-1.2940061948,1.1496085077,0.
2753178389\F,1.3831231775,-1.0611967378,-0.2843751351\F,0.8394943351,-
0.0227653524,1.5543965789\F,1.3743057994,1.117280856,-0.2242547237\H,-
```

2.5357778998,-1.1088352039,-0.1249989261\H,-1.5079930556,-1.261792782,  
1.3243109478\H,-1.0624635518,-2.1116104837,-0.1781786183\Version=IA64  
L-G03RevC.02\State=1-A\HF=-615.3356283\RMSD=3.089e-09\RMSF=8.908e-05\D  
ipole=-0.4521327,-0.6190448,0.215737\PG=C01 [X(C3H3F5)]\@

n.CH3-CF2H

1\1\GINC-AC29\FOpt\RB3LYP\Gen\C2H4F2\CYL509\05-Apr-2008\0\#B3LYP/GEN  
6D INT (GRID=ULTRAFINE) OPT FREQ=NORAMAN MAXDISK=1342177280\CH3-CF2H.f  
req\0,1\C,0.3168212601,0.0145880806,-0.1794375532\C,0.349943197,0.046  
5566125,1.327784024\H,0.8167293845,0.9721733211,1.6765718164\H,-0.6736  
607659,-0.0041707023,1.7105835958\H,1.3077378787,0.0615052985,-0.64602  
77915\F,-0.4166975612,1.0711553111,-0.6524812193\F,-0.2909667623,-1.13  
67475986,-0.6078469306\H,0.9175856719,-0.8060454885,1.711746904\Ver  
sion=IA64L-G03RevC.02\State=1-A\HF=-278.3016091\RMSD=7.754e-09\RMSF=5.02  
5e-05\Dipole=0.5583501,0.0425574,0.5261017\PG=C01 [X(C2H4F2)]\@

n.CH3-CF3

1\1\GINC-AC25\FOpt\RB3LYP\Gen\C2H3F3\CYL509\05-Apr-2008\0\#B3LYP/GEN  
6D INT (GRID=ULTRAFINE) OPT FREQ=NORAMAN MAXDISK=1342177280\CH3-CF3.f  
req\0,1\F,0.029126865,0.078856162,-1.3603925821\C,0.0143922493,0.02365  
93746,-0.009710629\F,1.3004567558,0.0278002594,0.4068650874\C,-0.72436  
20108,-1.1911891567,0.4868208096\F,-0.555087546,1.1670885098,0.4329781  
101\H,-1.7572072871,-1.1612779732,0.1327454\H,-0.715307047,-1.20315946  
37,1.5791611519\H,-0.2381317705,-2.0940882517,0.1103768268\Ver  
sion=IA64L-G03RevC.02\State=1-A\HF=-377.5549316\RMSD=2.542e-09\RMSF=3.766e-05  
\Dipole=-0.3934698,-0.647387,0.2644714\PG=C01 [X(C2H3F3)]\@

n.CH3-CC12H

1\1\GINC-AC29\FOpt\RB3LYP\Gen\C2H4C12\CYL509\05-Apr-2008\0\#B3LYP/GEN  
6D INT (GRID=ULTRAFINE) OPT FREQ=NORAMAN MAXDISK=1342177280\CH3-CC12H  
.freq\0,1\C,0.5317915244,-0.0377280063,0.1236991044\C,0.6107708223,-0  
.0395155509,1.6375076469\H,1.5101629807,-0.1105488926,-0.3474423091\C1  
, -0.1944835848,1.503122148,-0.4821759479\C1,-0.4097412616,-1.462214573  
4,-0.4736523758\H,1.2115317109,0.8110742497,1.9741120338\H,-0.38735935  
54,0.0340498933,2.0765340653\H,1.0821129729,-0.9665426742,1.9786372041  
\Version=IA64L-G03RevC.02\State=1-A\HF=-999.0165063\RMSD=6.693e-09\RM  
SF=6.816e-05\Dipole=0.6538226,-0.0441606,0.6070099\PG=C01 [X(C2H4C12)]  
\@

n.CH3-CC13

1\1\GINC-AC25\FOpt\RB3LYP\Gen\C2H3C13\CYL509\05-Apr-2008\0\#B3LYP/GEN  
6D INT (GRID=ULTRAFINE) OPT FREQ=NORAMAN MAXDISK=1342177280\CH3-CC13.  
freq\0,1\C,0.0109801763,0.003029888,0.2529598023\C,0.0732843871,0.019  
7009895,1.772199865\C1,1.6718716277,-0.1726983197,-0.4315163779\C1,-0.  
7133263944,1.5426734429,-0.3523841561\C1,-1.0038325632,-1.3821151978,-  
0.3078924416\H,0.6879726062,0.8604897175,2.1025846922\H,0.5123827621,-  
0.9150058782,2.1295219885\H,-0.9360581401,0.1245121649,2.1774158991\Ver  
sion=IA64L-G03RevC.02\State=1-A\HF=-1458.5990036\RMSD=3.468e-09\RMSF  
=1.238e-04\Dipole=0.0343023,0.0090281,0.7831731\PG=C01 [X(C2H3C13)]\@

n.CH3-CH2C1

1\1\GINC-AC19\FOpt\RB3LYP\Gen\C2H5C11\CYL509\05-Apr-2008\0\#B3LYP/GEN  
6D INT (GRID=ULTRAFINE) OPT FREQ=NORAMAN MAXDISK=1342177280\CH3-CH2C1  
.freq\0,1\H,0.152939702,-1.6766343048,-1.1951110927\C,0.1435919935,-1  
.6482902457,-0.1015344938\H,1.1777416708,-1.6766340082,0.2541783383\H,  
-0.3718289714,-2.5458447524,0.2629232015\C,-0.5788235967,-0.4141291988  
,0.4092900091\C1,0.2261145327,1.1178256213,-0.1598872833\H,-0.58297858  
1,-0.3647027667,1.4998849735\H,-1.6084312567,-0.3647030635,0.049675303  
8\Version=IA64L-G03RevC.02\State=1-A\HF=-539.4262592\RMSD=4.179e-09\  
RMSF=4.191e-05\Dipole=-0.3397106,-0.7898793,0.2402117\PG=CS [SG(C2H1C1  
1),X(H4)]\@

n.CH3-CH2F

1\1\GINC-AC19\FOpt\RB3LYP\Gen\C2H5F1\CYL509\05-Apr-2008\0\#B3LYP/GEN  
6D INT (GRID=ULTRAFINE) OPT FREQ=NORAMAN MAXDISK=1342177280\CH3-CH2F.f  
req\0,1\C,-0.5965306137,-0.3851921941,0.9846348645\C,-0.347681331,0.1  
596739261,-0.4081612519\F,1.0227537398,0.2506683277,-0.6407626222\H,-0  
.7793152501,1.1617767341,-0.5278531378\H,-0.7793152046,-0.4951980711,-  
1.1760667756\H,-0.1541556111,0.2726100659,1.7398324051\H,-0.1541555396  
, -1.3808242827,1.0930037928\H,-1.6725703847,-0.461269784,1.179105642\Ver  
sion=IA64L-G03RevC.02\State=1-A\HF=-179.0564227\RMSD=3.869e-09\RMSF  
=9.244e-05\Dipole=-0.6467537,-0.0706048,0.1804812\PG=C01 [X(C2H5F1)]\@

n.CH3-CH2OH

1\1\GINC-AC30\FOpt\RB3LYP\Gen\C2H6O1\CYL509\07-Apr-2008\0\#B3LYP/GEN  
6D INT (GRID=ULTRAFINE) OPT FREQ=NORAMAN MAXDISK=1342177280\CH3-CH2OH.

freq\0,1\C,-0.4129563554,0.0000000097,-1.1721226719\C,-0.4336937028,-  
0.0000000474,0.3474741898\O,0.9172385285,0.0000000442,0.8013387676\H,0  
.109161998,0.8868592504,-1.5460133939\H,0.1091621401,-0.8868591199,-1.  
5460134587\H,-1.4328551688,-0.0000000573,-1.5725072617\H,-0.9744341204  
, -0.8875625033,0.7156739292\H,-0.9744342627,0.8875622949,0.7156739941\  
H,0.9053915348,0.0000000078,1.770366943\Version=IA64L-G03RevC.02\Stat  
e=1-A\HF=-155.0337992\RMSD=1.846e-09\RMSF=3.755e-05\Dipole=-0.475568,  
0.,0.3898336\PG=CS [SG(C2H2O1),X(H4)]\@

n.CH3-CH2Ph

1\1\GINC-SC122\FOpt\RB3LYP\6-31G(d)\C8H10\MLC501\11-Sep-2002\0\#P B3L  
YP/6-31G(D) FOPT=(MAXCYC=100) FREQ MAXDISK=52428800 SCF=(TIGHT,MAXCYC=  
100) GEOM=CHECK\etbz-cs-6drb3\0,1\C,-2.2284396309,1.7737516665,0.\C,  
-0.6937105063,1.8926699354,0.\C,0.,0.546181554,0.\C,0.3118254669,-0.10  
23160492,1.2026834225\C,0.3118254669,-0.1023160492,-1.2026834225\C,0.9  
132220777,-1.3616103083,1.2059190433\C,0.9132220777,-1.3616103083,-1.2  
059190433\C,1.2153222385,-1.9966792384,0.\H,1.6863498799,-2.976105526,  
0.\H,1.150067146,-1.8447129978,2.1505767223\H,1.150067146,-1.844712997  
8,-2.1505767223\H,0.0837929653,0.387950677,2.1471919348\H,0.0837929653  
,0.387950677,-2.1471919348\H,-0.3779096411,2.4687487917,-0.8791267801\  
H,-0.3779096411,2.4687487917,0.8791267801\H,-2.5794995785,1.2298765659  
,0.8842051352\H,-2.5794995785,1.2298765659,-0.8842051352\H,-2.69885480  
66,2.7639522374,0.\Version=DEC-AXP-OSF/1-G98RevA.11.3\State=1-A\HF=-  
310.8802404\RMSD=5.588e-09\RMSF=2.772e-06\Dipole=-0.0632775,0.0900445,  
0.\PG=CS [SG(C4H2),X(C4H8)]\@

n.CH3-CH<sub>2</sub>CH<sub>2</sub>

1\1\GINC-AC28\FOpt\RB3LYP\Gen\C4H8\CYL509\14-Apr-2008\0\#B3LYP/GEN 6D  
INT(GRID=ULTRAFINE) OPT FREQ=NORAMAN MAXDISK=1342177280\CH3-CH<sub>2</sub>CH<sub>2</sub>  
.freq\0,1\C,-0.9069040941,-0.355602893,-0.7482824075\C,-0.8972401886,  
-0.3470834824,0.7633143755\C,0.4046838034,-0.3445871529,-0.0009189447\  
C,1.2845391857,0.8875220518,-0.0127549402\H,1.9351920314,0.9231729204,  
0.8701345955\H,0.6784090887,1.8017382783,-0.013879115\H,1.9254396361,0  
.9136462762,-0.9028982028\H,0.9512181151,-1.2869214215,0.0008418546\H,  
-1.1908547276,0.5702536364,1.2684892494\H,-1.1933206441,-1.2525206468,  
1.2865583382\H,-1.2068330634,0.5560140287,-1.2600559969\H,-1.209722674  
9,-1.2668742122,-1.2573392218\Version=IA64L-G03RevC.02\State=1-A\HF=-  
157.2120142\RMSD=3.216e-09\RMSF=5.218e-05\Dipole=0.0408506,-0.0105918,  
-0.0001185\PG=C01 [X(C4H8)]\@

n.CH3-CH<sub>2</sub>CH=CH<sub>2</sub>

1\1\GINC-AC29\FOpt\RB3LYP\Gen\C4H8\CYL509\05-Apr-2008\0\#B3LYP/GEN 6D  
INT(GRID=ULTRAFINE) OPT FREQ=NORAMAN MAXDISK=1342177280\CH3-CH<sub>2</sub>CH=CH<sub>2</sub>  
2.freq\0,1\H,0.2104087115,-1.5083209749,-1.441292261\C,0.3119965082,-  
1.7049522569,-0.3682921263\H,1.3821949935,-1.7971787767,-0.1468568848\  
H,-0.1581677346,-2.6709489982,-0.1519805649\C,-0.3314799566,-0.5796468  
885,0.4599017926\C,0.3158179096,0.7584943927,0.2252240637\H,-0.2532648  
32,-0.8383442948,1.526658146\H,-1.4030697738,-0.5148252156,0.232286344  
7\H,1.3814476627,0.8148946385,0.4576315215\C,-0.3004810895,1.842669242  
2,-0.2468437574\H,0.2255531064,2.7812206181,-0.4009085113\H,-1.3602223  
639,1.834116066,-0.4954776251\Version=IA64L-G03RevC.02\State=1-A\HF=-  
157.2210723\RMSD=3.477e-09\RMSF=7.498e-06\Dipole=0.0201067,-0.1254964,  
0.0373354\PG=C01 [X(C4H8)]\@

n.CH3-CH<sub>2</sub>CH<sub>3</sub>

1\1\GINC-AC18\FOpt\RB3LYP\Gen\C3H8\CYL509\05-Apr-2008\0\#B3LYP/GEN 6D  
INT(GRID=ULTRAFINE) OPT FREQ=NORAMAN MAXDISK=1342177280\CH3-CH<sub>2</sub>CH<sub>3</sub>.f  
req\0,1\H,0.3433093172,-0.3757188915,-2.1473334273\C,0.3586489515,-0.  
6325608865,-1.0817319361\H,1.3957339377,-0.8657222481,-0.8098130521\H,  
-0.2301997608,-1.5489412973,-0.9507199756\C,-0.1946819459,0.5071097342  
, -0.2203283523\H,0.3923630535,1.4180693686,-0.3997896001\C,-0.18613778  
63,0.1830190752,1.2770282005\H,-1.2205001888,0.7392505519,-0.537344938  
1\H,0.8321376706,-0.0200527907,1.6315662818\H,-0.7931697188,-0.7051248  
961,1.4927533205\H,-0.5866496266,1.0128326658,1.8708739179\Version=IA  
64L-G03RevC.02\State=1-A\HF=-119.1442428\RMSD=4.751e-09\RMSF=2.528e-05  
\Dipole=-0.00723,0.0188855,-0.0082204\PG=C01 [X(C3H8)]\@

n.CH3-CH<sub>2</sub>CH<sub>3</sub>

1\1\GINC-AC26\FOpt\RB3LYP\Gen\C4H10\CYL509\05-Apr-2008\0\#B3LYP/GEN 6  
D INT(GRID=ULTRAFINE) OPT FREQ=NORAMAN MAXDISK=1342177280\CH3-CH<sub>2</sub>CH<sub>3</sub>  
2.freq\0,1\C,-0.8154522391,1.2088090314,0.141554704\H,-0.5537675912,1  
.4205163378,1.1867798271\H,-1.9052971282,1.0989818085,0.0877526865\H,-  
0.5364641997,2.0858347908,-0.4548637092\C,-0.100461725,-0.0558427644,-  
0.3548862041\C,1.4240519283,0.1219811794,-0.3216646\H,-0.3969292358,-0  
.220520761,-1.40179813\C,-0.5311159233,-1.2877423315,0.4537541585\H,-0  
.0486911679,-2.1992763073,0.0808136495\H,-1.6163484951,-1.4382240336,0  
.405292065\H,-0.2578235347,-1.1756708207,1.5113624215\H,1.938531212,-0

.7665017775,-0.7071864067\H,1.7752251033,0.2903716972,0.7050219206\H,1.7394327916,0.9812583762,-0.9257226751\Version=IA64L-G03RevC.02\State=1-A\HF=-158.4588096\RMSD=1.754e-09\RMSF=1.705e-05\Dipole=-0.0090381,-0.0050283,-0.0319434\PG=C01 [X(C4H10)]\@

n.CH3-C\_CH3\_3

1\1\GINC-AC25\FOpt\RB3LYP\Gen\C5H12\CYL509\05-Apr-2008\0\#B3LYP\GEN 6D INT (GRID=ULTRAFINE) OPT FREQ=NORAMAN MAXDISK=1342177280\CH3-C\_CH3\_3.freq\0,1\C,-0.2605458925,-0.5530850164,1.4138431575\C,0.0000101688,0.0000013458,0.0000093653\C,-0.628822628,1.400374715,-0.1274461111\C,-0.6288254906,-0.9421644505,-1.0438605495\H,0.1767545644,0.0982977292,2.1807467753\H,0.1765678042,-1.5520408016,1.5350661155\H,-1.3359455426,-0.6321275361,1.6161825135\C,1.5181947246,0.0948794909,-0.2425431865\H,-0.1997405863,-1.9497087146,-0.9773913938\H,-0.4593225663,-0.5734015878,-2.0631518804\H,-1.7124155395,-1.0300706297,-0.8962253071\H,1.9949532099,0.7608965147,0.4873892977\H,1.7355089002,0.4865177741,-1.2440752508\H,1.9950346124,-0.8895779284,-0.157984684\H,-0.1997954786,2.0952547737,0.6051832325\H,-1.7124115163,1.3646650729,0.0405791793\H,-0.4592531559,1.8212588254,-1.1263346518\Version=IA64L-G03RevC.02\State=1-A\HF=-197.7729779\RMSD=3.533e-09\RMSF=1.210e-05\Dipole=-0.0000044,-0.0000037,0.0000067\PG=C01 [X(C5H12)]\@

n.CH3-CCH

1\1\GINC-AC2\FOpt\RB3LYP\Gen\C3H4\CYL509\07-Apr-2008\0\#B3LYP\GEN 6D INT (GRID=ULTRAFINE) OPT FREQ=NORAMAN MAXDISK=1342177280\CH3-CCH.freq\0,1\C,0.4457552152,0.2225294111,1.1369810945\H,1.5288718374,0.3918758605,1.1119682126\H,0.2562425832,-0.622343289,1.8098143395\H,-0.0201646545,1.1114055542,1.5788489484\C,-0.0788363392,-0.0392700264,-0.2004234436\C,-0.5119842433,-0.2556345702,-1.3062159844\H,-0.8945575624,-0.4466870126,-2.282681499\Version=IA64L-G03RevC.02\State=1-A\HF=-116.6532693\RMSD=2.169e-09\RMSF=1.499e-05\Dipole=0.0971577,0.0484488,0.2473448\PG=C01 [X(C3H4)]\@

n.CH3-CH=C\_CH3\_2

1\1\GINC-AC26\FOpt\RB3LYP\Gen\C5H10\CYL509\07-Apr-2008\0\#B3LYP\GEN 6D INT (GRID=ULTRAFINE) OPT FREQ=NORAMAN MAXDISK=1342177280\CH3-CH=C\_CH3\_2.freq\0,1\C,-0.4149566233,0.4394676962,2.0285066869\H,0.6553930442,0.6136195718,2.1676045371\H,-0.7200766483,-0.3398884641,2.7405527152\H,-0.9422717814,1.3561076889,2.327161991\C,-0.7752677503,0.049504578,0.6222756597\C,0.0323179519,-0.1025493371,-0.4383453808\H,-1.840320066,-0.1290862454,0.4640912058\C,1.5280935621,0.0984304422,-0.4213755554\C,-0.5275061873,-0.5036856416,-1.7831507047\H,-0.0789961363,-1.44350132,-2.1357091316\H,-0.3021929344,0.2525643843,-2.548682263\H,-1.6133530797,-0.6385583501,-1.7502999777\H,1.8233886782,0.8744388098,-1.1415984635\H,2.0464863825,-0.8208107435,-0.7285322611\H,1.9158568229,0.3881082421,0.5579474133\Version=IA64L-G03RevC.02\State=1-A\HF=-196.5435771\RMSD=5.092e-09\RMSF=7.881e-06\Dipole=0.0676068,0.0051303,-0.0157486\PG=C01 [X(C5H10)]\@

n.CH3-CH=CH2

1\1\GINC-AC12\FOpt\RB3LYP\Gen\C3H6\CYL509\07-Apr-2008\0\#B3LYP\GEN 6D INT (GRID=ULTRAFINE) OPT FREQ=NORAMAN MAXDISK=1342177280\CH3-CH=CH2.freq\0,1\C,0.041981285,0.2345551139,1.2227682436\H,1.1336755235,0.3128042826,1.2625753495\H,-0.2693715704,-0.5507246578,1.9250050389\H,-0.3814858116,1.1759665191,1.5982544835\C,-0.4392576508,-0.0604143514,-0.1690868163\C,0.3432749945,-0.2125278429,-1.237783683\H,-1.5198236356,-0.1528463678,-0.2899559369\H,1.4264612508,-0.1294512662,-1.1692799408\H,-0.0654475296,-0.4254260272,-2.2220173487\Version=IA64L-G03RevC.02\State=1-A\HF=-117.9075585\RMSD=7.366e-09\RMSF=3.818e-05\Dipole=-0.0467448,0.0216798,0.1299055\PG=C01 [X(C3H6)]\@

n.CH3-CH=CHCH3

1\1\GINC-AC28\FOpt\RB3LYP\Gen\C4H8\CYL509\07-Apr-2008\0\#B3LYP\GEN 6D INT (GRID=ULTRAFINE) OPT FREQ=NORAMAN MAXDISK=1342177280\CH3-CH=CHCH3.freq\0,1\C,0.1270540134,0.4006759751,1.9196455786\H,1.1902174935,0.1513307189,2.007054982\H,-0.4274730333,-0.2285090106,2.6294287839\H,-0.0053934852,1.4391162808,2.2531929576\C,-0.3700147986,0.2095373485,0.5148570174\C,0.3698982794,-0.2098618659,-0.5147682465\H,-1.4241222579,0.4379319115,0.3432992776\H,1.4240829189,-0.4378945612,-0.3432497565\C,-0.1269876328,-0.4005254188,-1.9196877366\H,0.4277172345,0.2288627194,-2.6291401884\H,-1.190086875,-0.1509392593,-2.0072781579\H,0.0053588353,-1.4388550329,-2.2535875754\Version=IA64L-G03RevC.02\State=1-A\HF=-157.2269102\RMSD=2.250e-09\RMSF=7.872e-06\Dipole=0.0000461,0.0001996,-0.0000533\PG=C01 [X(C4H8)]\@

n.CH3-CHO

1\1\GINC-AC18\FOpt\RB3LYP\Gen\C2H4O1\CYL509\05-Apr-2008\0\#B3LYP\GEN

6D INT (GRID=ULTRAFINE) OPT FREQ=NORAMAN MAXDISK=1342177280\CH3-CHO.fr  
eq\0,1\C,0.0526477067,0.2645017475,1.1492676754\H,1.1415237494,0.3252  
469362,1.2110074148\H,-0.3209206199,-0.4967545375,1.8468769331\H,-0.39  
45072797,1.2194465372,1.4556458105\C,-0.378866289,-0.0743253817,-0.255  
7156299\O,0.3765116046,-0.2544258868,-1.1844050461\H,-1.4808771926,-0.  
1535900364,-0.3996020622\Version=IA64L-G03RevC.02\State=1-A\HF=-153.8  
301199\RMSD=4.014e-09\RMSF=1.754e-05\Dipole=-0.4918775,0.1838219,0.896  
6509\PG=C01 [X(C2H4O1)]\@

n.CH3-CN

1\1\GINC-AC18\FOpt\RB3LYP\Gen\C2H3N1\CYL509\05-Apr-2008\0\#B3LYP/GEN  
6D INT (GRID=ULTRAFINE) OPT FREQ=NORAMAN MAXDISK=1342177280\CH3-CN.fre  
q\0,1\C,0.3997362777,0.2014618411,1.0925484639\H,1.4930422859,0.25515  
96826,1.0937030381\H,0.0891175623,-0.6038364438,1.7657598013\H,0.00339  
49205,1.1477755687,1.4741328926\C,-0.0949412412,-0.0478491403,-0.25949  
08519\N,-0.4877607125,-0.2458250017,-1.3331344862\Version=IA64L-G03Re  
vC.02\State=1-A\HF=-132.7549292\RMSD=7.634e-09\RMSF=7.263e-05\Dipole=  
0.5079392,0.2559947,1.3882858\PG=C03V [C3(C1C1N1),3SGV(H1)]\@

n.CH3-COCH3

1\1\GINC-AC30\FOpt\RB3LYP\Gen\C3H6O1\CYL509\07-Apr-2008\0\#B3LYP/GEN  
6D INT (GRID=ULTRAFINE) OPT FREQ=NORAMAN MAXDISK=1342177280\CH3-COCH3.  
freq\0,1\C,0.1148826767,-0.051284736,-1.4262472258\C,-0.1578277899,-  
0.0260899841,0.0935274626\C,1.1621393328,0.2244214847,0.8056533694\O,-  
1.1932497837,-0.1972727831,0.7071077152\H,-1.1150494767,-0.2379135844,  
-1.8221363055\H,0.5714031133,-0.8317436189,-1.7786034804\H,0.262645811  
1,0.902521121,-1.8160973232\H,1.5873261758,1.1886057613,0.4993478654\H  
,1.0068092941,0.2200565354,1.8862761447\H,1.8962901554,-0.545624537,0.  
5367497397\Version=IA64L-G03RevC.02\State=1-A\HF=-193.1556928\RMSD=4.  
732e-09\RMSF=1.816e-06\Dipole=0.9434492,0.1559708,-0.5590769\PG=C01 [X  
(C3H6O1)]\@

n.CH3-CON\_CH2CH3\_2

1\1\GINC-AC30\FOpt\RB3LYP\Gen\C6H13N1O1\CYL509\07-Apr-2008\0\#B3LYP/G  
EN 6D INT (GRID=ULTRAFINE) OPT FREQ=NORAMAN MAXDISK=1342177280\CH3-CON  
\_CH2CH3\_2.freq\0,1\C,-1.434751685,1.5048996524,-1.0552379586\H,-1.601  
1983621,1.8082363541,-2.0895225519\H,-1.2297671723,2.4024145018,-0.459  
0413928\H,-2.3477579782,1.0445913859,-0.6631414873\C,-0.2423285737,0.5  
536524069,-1.0500258576\O,0.4332614086,0.3884567909,-2.0626829602\N,0.  
05004452,-0.1009087866,0.1226837777\C,-0.6836991332,0.0700804237,1.375  
5131245\C,1.1976480271,-1.0153601091,0.1266079735\H,0.0465777637,0.065  
0388117,2.194442999\C,-1.7446196049,-1.0098831986,1.6210996892\H,-1.14  
69872691,1.0595767081,1.3907516337\H,1.247368384,-1.48771385,-0.856653  
0045\H,0.999543169,-1.7979971486,0.8679220209\C,2.5220709141,-0.309700  
6992,0.4305965222\H,-2.5131451457,-0.9908143148,0.8408120777\H,-2.2340  
968336,-0.8529646087,2.5894538355\H,-1.2981262523,-2.0101726126,1.6267  
88343\H,2.7342074793,0.434172246,-0.3426129627\H,3.3455809071,-1.03325  
07661,0.4485971277\H,2.4954787347,0.195459615,1.4035596399\Version=IA  
64L-G03RevC.02\State=1-A\HF=-366.4618066\RMSD=3.612e-09\RMSF=4.242e-06  
\Dipole=-0.536923,-0.0516932,1.3464833\PG=C01 [X(C6H13N1O1)]\@

n.CH3-CON\_CH3\_2

1\1\GINC-AC24\FOpt\RB3LYP\Gen\C4H9N1O1\CYL509\07-Apr-2008\0\#B3LYP/GE  
N 6D INT (GRID=ULTRAFINE) OPT FREQ=NORAMAN MAXDISK=1342177280\CH3-CON\_  
CH3\_2.freq\0,1\H,-1.3506656664,1.4996474101,-1.6016687142\C,-1.502762  
6077,0.8796119124,-0.7077321736\N,-0.2269643951,0.5503371077,-0.090792  
7956\H,-1.9973980168,-0.0493648329,-0.9875246976\H,-2.1377139038,1.438  
3649008,-0.0067828291\C,0.133284009,-0.7734330839,0.0360187592\O,-0.59  
07829824,-1.682653515,-0.356338481\C,1.4779439039,-1.0815307811,0.6877  
140023\H,1.5860387385,-2.1664101357,0.6992900737\H,1.5320723694,-0.709  
7611048,1.7172491814\H,2.3156963713,-0.6486291028,0.1292758544\C,0.566  
001743,1.684927611,0.3441663703\H,0.8007224123,2.3423985542,-0.5050635  
305\H,1.5038469786,1.3639514929,0.7946517379\H,0.0156130523,2.28121723  
36,1.0858285916\Version=IA64L-G03RevC.02\State=1-A\HF=-287.830206\RMS  
D=2.908e-09\RMSF=4.528e-05\Dipole=0.5948392,1.2651447,0.3422538\PG=C01  
[X(C4H9N1O1)]\@

n.CH3-CONH2

1\1\GINC-AC30\FOpt\RB3LYP\Gen\C2H5N1O1\CYL509\08-Apr-2008\0\#B3LYP/GE  
N 6D INT (GRID=ULTRAFINE) OPT FREQ=NORAMAN MAXDISK=1342177280\CH3-CONH  
2.freq\0,1\C,-0.1520840434,-0.0417695178,-1.3983386089\C,-0.109019234  
9,-0.027394312,0.1241614881\N,1.1228379041,0.2119941621,0.6738998618\O  
, -1.1023992949,-0.2170071156,0.8086012197\H,-0.6917611699,0.8455434296  
, -1.7467178144\H,0.8366966321,-0.0587203322,-1.8674337051\H,-0.7187452  
073,-0.9181983285,-1.7230589281\H,1.1783740817,0.3201686199,1.67707821  
39\H,1.9213843641,0.47828738,0.1190861682\Version=IA64L-G03RevC.02\St  
ate=1-A\HF=-209.212201\RMSD=7.638e-09\RMSF=1.076e-05\Dipole=1.2982588,

0.400104,-0.5345889\PG=C01 [X(C2H5N1O1)]\@

n.CH3-CONHCH3

1\1\GINC-AC25\FOpt\RB3LYP\Gen\C3H7N1O1\CYL509\05-Apr-2008\0\#B3LYP/GEN  
6D INT (GRID=ULTRAFINE) OPT FREQ=NORAMAN MAXDISK=1342177280\CH3-CONH  
CH3.freq\0,1\C,0.2176547273,0.438257633,0.1497100573\O,1.3677712313,0  
.4117585396,-0.270152217\C,-0.3160287937,1.6196078296,0.9488245586\H,0  
.3085212794,1.7539374875,1.8373048108\H,-1.3597093097,1.5116820151,1.2  
618916581\H,-0.2194646293,2.5260121248,0.3433314892\N,-0.6769370859,-0  
.576853112,-0.0590302447\H,-1.6091930831,-0.4870244442,0.316410178\C,-  
0.3374540549,-1.7775261456,-0.7997660068\H,0.7022382826,-1.6772188025,  
-1.1147236619\H,-0.972132006,-1.8919449557,-1.6869244232\H,-0.43890205  
45,-2.6735758603,-0.1754722569\Version=IA64L-G03RevC.02\State=1-A\HF=  
-248.5235631\RMSD=2.265e-09\RMSF=2.373e-06\Dipole=-1.3629116,-0.286514  
1,0.332993\PG=C01 [X(C3H7N1O1)]\@

n.CH3-COOC\_CH3\_3

1\1\GINC-AC25\FOpt\RB3LYP\Gen\C6H12O2\CYL509\07-Apr-2008\0\#B3LYP/GEN  
6D INT (GRID=ULTRAFINE) OPT FREQ=NORAMAN MAXDISK=1342177280\CH3-COOC  
CH3\_3.freq\0,1\C,-2.5979884745,0.7722157134,-0.5521020849\H,-2.982917  
4026,1.2816945487,-1.4362155178\H,-2.8051368384,1.3692237887,0.3421207  
78\H,-3.1053065869,-0.1898571463,-0.4256005553\C,-1.1057657938,0.55960  
032,-0.70374185\O,-0.4586196266,0.9102641421,-1.668340535\O,-0.6165819  
463,-0.0707781962,0.3845417738\C,0.8143477937,-0.4081667263,0.51021722  
76\C,1.2240767838,-1.3782743401,-0.603064805\C,0.875626538,-1.09367587  
97,1.8776310447\C,1.6572034423,0.8716633152,0.5054641371\H,1.903099735  
9,-1.4008316139,2.0997680251\H,0.2367023333,-1.9826333495,1.8936273445  
\H,0.5386262183,-0.4135634303,2.666680424\H,2.2513448143,-1.7195958814  
, -0.4319287316\H,1.1722260857,-0.9003044526,-1.5824694579\H,0.57032914  
47,-2.2575040633,-0.6016555369\H,2.7023341083,0.6229040076,0.722008739  
9\H,1.3057387831,1.5619492505,1.2803215526\H,1.6095704501,1.3724563592  
, -0.4626889912\Version=IA64L-G03RevC.02\State=1-A\HF=-386.3389759\RMS  
D=6.669e-09\RMSF=2.249e-06\Dipole=-0.0684515,-0.3169678,0.6701415\PG=C  
01 [X(C6H12O2)]\@

n.CH3-COOCH2CH3

1\1\GINC-AC22\FOpt\RB3LYP\Gen\C4H8O2\CYL509\07-Apr-2008\0\#B3LYP/GEN  
6D INT (GRID=ULTRAFINE) OPT FREQ=NORAMAN MAXDISK=1342177280\CH3-COOCH2  
CH3.freq\0,1\C,-1.9943537601,0.9794386963,-0.6551195229\H,-2.28392359  
47,1.4121680137,-1.6132382128\H,-2.0759179555,1.7340181348,0.134179473  
\H,-2.6742542114,0.1613658368,-0.3952530826\C,-0.5743080426,0.46863067  
01,-0.742579783\O,0.1365411801,0.5281317178,-1.721952338\O,-0.18568585  
69,-0.0754797744,0.4336604659\C,1.1611474766,-0.6004301239,0.470898073  
9\H,1.8612408175,0.2054043642,0.2274414124\H,1.2624372471,-1.368624433  
2,-0.302669472\C,1.3951504366,-1.1580859423,1.8623620077\H,2.408735594  
6,-1.5676390385,1.9333946202\H,0.6834889024,-1.9588057222,2.0880951682  
\H,1.2855339522,-0.3764225036,2.6210204154\Version=IA64L-G03RevC.02\St  
ate=1-A\HF=-307.7074381\RMSD=3.499e-09\RMSF=4.611e-06\Dipole=-0.19106  
24,-0.1724817,0.7278301\PG=C01 [X(C4H8O2)]\@

n.CH3-COOCH3

1\1\GINC-AC25\FOpt\RB3LYP\Gen\C3H6O2\CYL509\05-Apr-2008\0\#B3LYP/GEN  
6D INT (GRID=ULTRAFINE) OPT FREQ=NORAMAN MAXDISK=1342177280\CH3-COOCH3  
.freq\0,1\C,0.1371807364,0.4736397932,0.0261577628\O,1.3331103026,0.4  
178588566,-0.1563999345\C,-0.6612560761,1.7333439688,0.2681254709\H,0.  
0071127132,2.5947643499,0.2531176199\H,-1.1729278978,1.67565631,1.2344  
603929\H,-1.4311728766,1.845662632,-0.5022820661\O,-0.6677619397,-0.61  
53524795,0.0384613066\C,-0.0043814533,-1.8700665236,-0.1829610357\H,0.  
4875942196,-1.8789309425,-1.159383319\H,-0.7882110642,-2.6271506958,-0  
.1420939568\H,0.7455587607,-2.0515561008,0.5917571653\Version=IA64L-G  
03RevC.02\State=1-A\HF=-268.3884841\RMSD=2.436e-09\RMSF=4.276e-06\Dipo  
le=-0.6635005,-0.209278,0.0777448\PG=C01 [X(C3H6O2)]\@

n.CH3-COOH

1\1\GINC-AC24\FOpt\RB3LYP\Gen\C2H4O2\CYL509\07-Apr-2008\0\#B3LYP/GEN  
6D INT (GRID=ULTRAFINE) OPT FREQ=NORAMAN MAXDISK=1342177280\CH3-COOH.f  
req\0,1\C,0.1477553891,-0.0220613277,-1.3937209281\C,0.1047512295,0.0  
228743191,0.1130819925\O,1.0450278752,0.2190442596,0.8491361639\O,-1.1  
537188103,-0.1886646792,0.5792324961\H,1.1687503505,0.1508194609,-1.73  
43002485\H,-0.5196475414,0.7393537646,-1.8105777555\H,-0.2057094253,-0  
.9952746054,-1.7498981231\H,-1.0889056142,-0.1428132121,1.5516604609\  
Version=IA64L-G03RevC.02\State=1-A\HF=-229.0817862\RMSD=5.739e-09\RMSF  
=6.377e-05\Dipole=-0.5173375,-0.1051791,-0.327732\PG=C01 [X(C2H4O2)]\@  
e

n.CH3-COPh

1\1\GINC-AC26\FOpt\RB3LYP\Gen\C8H8O1\CYL509\07-Apr-2008\0\#B3LYP/GEN



6D INT (GRID=ULTRAFINE) OPT FREQ=NORAMAN MAXDISK=1342177280\CH3-COPh.f  
req\0,1\C,-2.2694230452,-0.0069540121,-0.1014754516\C,-2.2482417085,-  
0.004016837,1.296707005\C,-1.0286767692,0.0010397892,1.9759337751\C,0.  
1684845258,0.003154631,1.2601502514\C,0.1570106677,0.0002451211,-0.142  
7835137\C,-1.075347392,-0.004832089,-0.8153076231\C,1.4117626688,0.002  
3461437,-0.9644405608\O,1.3571956036,-0.000463673,-2.1850659197\C,2.75  
61707459,0.0074575057,-0.2542581648\H,3.5472731402,0.007988802,-1.0058  
832877\H,2.8671119022,-0.8741495209,0.3883847376\H,2.8623649221,0.8923  
917285,0.3846039877\H,-1.066530938,-0.0070203659,-1.9003602372\H,1.110  
2131661,0.0070851729,1.8004137369\H,-1.0094383151,0.0033360705,3.06233  
03922\H,-3.218269913,-0.0108946644,-0.6311079883\H,-3.1807269532,-0.00  
56693536,1.8549917111\Version=IA64L-G03RevC.02\State=1-A\HF=-384.8959  
85\RMSD=6.742e-09\RMSF=4.050e-05\Dipole=-0.2248787,0.0017239,1.1578317  
\PG=C01 [X(C8H8O1)]\@

n.H-H

1\1\GINC-AC9\FOpt\RB3LYP\Gen\H2\CYL509\20-Jun-2008\0\#B3LYP/GEN 6D IN  
T (GRID=ULTRAFINE) OPT FREQ=NORAMAN MAXDISK=2684354560\H.H.freq\0,1\H  
,0.,0.,-0.3715996858\H,0.,0.,0.3715996858\Version=IA64L-G03RevC.02\St  
ate=1-SGG\HF=-1.1754823\RMSD=2.224e-12\RMSF=1.693e-04\Dipole=0.,0.,0.\  
PG=D\*H [C\*(H1.H1)]\@

n.BH2-BH2

1\1\GINC-AC18\FOpt\RB3LYP\Gen\B2H4\CYL509\20-Aug-2008\0\#B3LYP/GEN 6D  
INT (GRID=ULTRAFINE) OPT FREQ=NORAMAN MAXDISK=2684354560\BH2.freq\0,  
1\B,-0.2640697042,-0.2132308244,-0.7467782146\H,0.4902352337,-0.4582  
650407,-1.648426577\H,-1.4315992257,-0.3021519747,-1.0131623925\B,0.26  
42276177,0.2132672263,0.7467119039\H,0.4577319411,1.35724163,1.0563419  
292\H,0.4828424833,-0.5970066242,1.6055785939\Version=IA64L-G03RevC.0  
2\State=1-A\HF=-52.0444634\RMSD=4.189e-09\RMSF=2.581e-05\Dipole=0.0002  
2,0.0000571,-0.000094\PG=C01 [X(B2H4)]\@

n.CH3-CH3

1\1\GINC-LC111\FOpt\RB3LYP\Gen\C2H6\CYL509\19-Jun-2008\0\#B3LYP/GEN 6  
D INT (GRID=ULTRAFINE) OPT FREQ=NORAMAN MAXDISK=1342177280\CH3.freq\0,  
1\C,-0.2797944899,0.582477219,0.4099745318\H,0.3149526622,1.4922966  
127,0.2681758199\H,-0.2804581568,0.3521695162,1.4816835545\H,-1.311611  
9612,0.8142391972,0.1214572411\C,0.2797944899,-0.582477219,-0.40997453  
18\H,-0.3149526622,-1.4922966127,-0.2681758199\H,0.2804581568,-0.35216  
95162,-1.4816835545\H,1.3116119612,-0.8142391972,-0.1214572411\Versio  
n=IA32L-G03RevC.02\State=1-AG\HF=-79.8304207\RMSD=1.686e-09\RMSF=4.666  
e-06\Dipole=0.,0.,0.\PG=CI [X(C2H6)]\@

n.NH2-NH2

1\1\GINC-AC9\FOpt\RB3LYP\Gen\H4N2\CYL509\25-Sep-2008\0\#B3LYP/GEN 6D  
INT (GRID=ULTRAFINE) OPT FREQ=NORAMAN MAXDISK=2684354560\NH2-NH2.fre  
q\0,1\N,0.,0.7183,-0.0775\N,0.,-0.7183,-0.0775\H,-0.2128,1.0984,0.847  
\H,0.2128,-1.0984,0.847\H,0.9477,1.0101,-0.3045\H,-0.9477,-1.0101,-0.3  
045\Version=IA64L-G03RevC.02\State=1-A\HF=-111.8564475\RMSD=2.140e-09  
\RMSF=4.550e-05\Dipole=0.,0.,0.8652721\PG=C02 [X(H4N2)]\@

n.OH-OH

1\1\GINC-AC30\FOpt\RB3LYP\Gen\H2O2\CYL509\20-Aug-2008\0\#B3LYP/GEN 6D  
INT (GRID=ULTRAFINE) OPT FREQ=NORAMAN MAXDISK=2684354560\OH.OH.freq\0  
,1\O,-0.0864926865,-0.0303245407,0.7245153407\H,0.5776459034,0.6420062  
552,0.9587958739\O,-0.0191992984,0.0564723967,-0.7278497763\H,0.267889  
9758,-0.8511891037,-0.9321203892\Version=IA64L-G03RevC.02\State=1-A\H  
F=-151.5332132\RMSD=1.828e-09\RMSF=1.646e-04\Dipole=0.6805144,-0.16835  
71,0.0214693\PG=C02 [X(H2O2)]\@

n.F-F

1\1\GINC-LC84\FOpt\RB3LYP\Gen\F2\CYL509\19-Jun-2008\0\#B3LYP/GEN 6D I  
NT (GRID=ULTRAFINE) OPT FREQ=NORAMAN MAXDISK=1342177280\F.F.freq\0,1\F,  
-0.2515095499,0.537876976,0.3735274133\F,0.2515095499,-0.537876976,-  
0.3735274133\Version=IA32L-G03RevC.02\State=1-SGG\HF=-199.4982522\RMS  
D=3.458e-10\RMSF=2.712e-06\Dipole=0.,0.,0.\PG=D\*H [C\*(F1.F1)]\@

n.SiH3-SiH3

1\1\GINC-LC19\FOpt\RB3LYP\Gen\H6Si2\CYL509\19-Jun-2008\0\#B3LYP/GEN 6  
D INT (GRID=ULTRAFINE) OPT FREQ=NORAMAN MAXDISK=1342177280\SiH3.freq\0,  
1\Si,-0.5537405154,0.959105483,0.3915531646\H,-1.9625449383,0.9853  
473145,-0.0904345424\H,-0.568877824,0.9853724996,1.8804492628\H,0.1279  
062605,2.1922875713,-0.0904741119\Si,0.5537405154,-0.959105483,-0.3915  
531646\H,1.9625449383,-0.9853473145,0.0904345424\H,0.568877824,-0.9853  
724996,-1.8804492628\H,-0.1279062605,-2.1922875713,0.0904741119\Versi  
on=IA32L-G03RevC.02\State=1-A1G\HF=-582.5827312\RMSD=4.260e-09\RMSF=8.  
078e-05\Dipole=0.,0.,0.\PG=D03D [C3(Si1.Si1),3SGD(H2)]\@

```

n.PH2-PH2
1\1\GINC-LC86\FOpt\RB3LYP\Gen\H4P2\CYL509\19-Jun-2008\0\#\B3LYP/GEN 6D
INT (GRID=ULTRAFINE) OPT FREQ=NORAMAN MAXDISK=1342177280\|n.PH2.freq\|
0,1\p,0.5638470058,-0.9404559261,-0.2880261799\H,-0.5665342781,-1.5578
466871,-0.900768818\H,1.022505596,-0.4121128669,-1.5309506477\p,-0.563
8470058,0.9404559261,0.2880261799\H,0.5665342781,1.5578466871,0.900768
818\H,-1.022505596,0.4121128669,1.5309506477\|Version=IA32L-G03RevC.02
\State=1-AG\HF=-685.0949308\RMSD=1.561e-09\RMSF=1.269e-05\Dipole=0.,0.
,0.\PG=CI [X(H4P2)]\|@

n.SH-SH
1\1\GINC-AC28\FOpt\RB3LYP\Gen\H2S2\CYL509\22-Aug-2008\0\#\B3LYP/GEN 6D
INT (GRID=ULTRAFINE) OPT FREQ=NORAMAN MAXDISK=2684354560\|n.SH.fail.fr
eq\|0,1\S,-0.0828112793,0.0292709984,1.0467406361\H,1.0530734042,0.731
0920402,1.2764501557\S,-0.0245688532,-0.0027055001,-1.0501283304\H,0.6
650087157,-1.1561400133,-1.2222470469\|Version=IA64L-G03RevC.02\State=
1-A\HF=-797.5717827\RMSD=2.877e-09\RMSF=1.901e-05\Dipole=0.5765659,-0.
1426405,0.0181899\PG=C02 [X(H2S2)]\|@

n.Cl-Cl
1\1\GINC-LC84\FOpt\RB3LYP\Gen\Cl2\CYL509\19-Jun-2008\0\#\B3LYP/GEN 6D
INT (GRID=ULTRAFINE) OPT FREQ=NORAMAN MAXDISK=1342177280\|n.Cl.freq\|0,
1\Cl,0.,0.,-1.0208438617\Cl,0.,0.,1.0208438617\|Version=IA32L-G03RevC.
02\State=1-SGG\HF=-920.3498788\RMSD=4.545e-09\RMSF=1.560e-05\Dipole=0.
,0.,0.\PG=D*H [C*(Cl1.Cl1)]\|@

n.Br-Br
1\1\GINC-LC104\FOpt\RB3LYP\Gen\Br2\CYL509\19-Jun-2008\0\#\B3LYP/GEN 6D
INT (GRID=ULTRAFINE) OPT FREQ=NORAMAN MAXDISK=1342177280\|n.Br.freq\|0
,1\Br,-0.4210408625,0.8888002597,0.6212577354\Br,0.4210408625,-0.88880
02597,-0.6212577354\|Version=IA32L-G03RevC.02\State=1-SGG\HF=-5147.754
7515\RMSD=1.117e-09\RMSF=8.857e-08\Dipole=0.,0.,0.\PG=D*H [C*(Br1.Br1)
]\|@

n.N_CH3_2-N_CH3_2
1\1\GINC-LC122\FOpt\RB3LYP\Gen\C4H12N2\CYL509\19-Jun-2008\0\#\B3LYP/GE
N 6D INT (GRID=ULTRAFINE) OPT FREQ=NORAMAN MAXDISK=1342177280\|n.N_CH3_
2.freq\|0,1\C,0.2745095964,-0.3243607972,1.7950223157\H,1.3639340675,-
0.3385478236,1.8700600706\H,-0.1028054762,-1.1287606194,2.4322385555\H
,-0.0978669624,0.6412926606,2.180036082\N,-0.163610616,-0.5908880685,0
.420844486\C,-1.6199341065,-0.764240349,0.4408305951\H,-1.858443849,-1
.5367037513,1.1769565135\H,-1.9872164119,-1.1162913389,-0.5255241872\H
,-2.1546929469,0.1636102634,0.7101068471\C,-0.2745095964,0.3243607972,
-1.7950223157\H,-1.3639340675,0.3385478236,-1.8700600706\H,0.102805476
2,1.1287606194,-2.4322385555\H,0.0978669624,-0.6412926606,-2.180036082
\N,0.163610616,0.5908880685,-0.420844486\C,1.6199341065,0.764240349,-0
.4408305951\H,1.858443849,1.5367037513,-1.1769565135\H,1.9872164119,1
.1162913389,0.5255241872\H,2.1546929469,-0.1636102634,-0.7101068471\|Ve
rsion=IA32L-G03RevC.02\State=1-AG\HF=-269.090437\RMSD=6.906e-09\RMSF=3
.936e-05\Dipole=0.,0.,0.\PG=CI [X(C4H12N2)]\|@

n.NHCH3-NHCH3
1\1\GINC-LC109\FOpt\RB3LYP\Gen\C2H8N2\CYL509\19-Jun-2008\0\#\B3LYP/GEN
6D INT (GRID=ULTRAFINE) OPT FREQ=NORAMAN MAXDISK=1342177280\|n.NHCH3.f
req\|0,1\N,-0.1726090381,-0.2588896412,-0.6688151058\C,-1.632365693,-0
.2987841936,-0.7752785845\H,-2.0191250411,-1.1118385396,-0.1482060441\
H,-1.8973666016,-0.5272620392,-1.8126590391\H,-2.1248234705,0.63677528
68,-0.466072443\H,0.1421111887,0.4885885265,-1.2920599315\N,0.17260903
81,0.2588896412,0.6688151058\C,1.632365693,0.2987841936,0.7752785845\H
,2.0191250411,1.1118385396,0.1482060441\H,1.8973666016,0.5272620392,1
.8126590391\H,2.1248234705,-0.6367752868,0.466072443\H,-0.1421111887,-0
.4885885265,1.2920599315\|Version=IA32L-G03RevC.02\State=1-AG\HF=-190.
4760079\RMSD=7.481e-09\RMSF=6.101e-05\Dipole=0.,0.,0.\PG=CI [X(C2H8N2)
]\|@

n.NHCHO-NHCHO
1\1\GINC-AC23\FOpt\RB3LYP\Gen\C2H4N2O2\CYL509\21-Aug-2008\0\#\B3LYP/GE
N 6D INT (GRID=ULTRAFINE) OPT FREQ=NORAMAN MAXDISK=1342177280\|n.NHCHO.
freq\|0,1\N,-0.931188354,0.5403009491,-0.1755771394\H,-1.8168879508,0.
0592565728,-0.274425333\C,-0.200331623,0.8306296877,-1.3111166293\O,0.
9730715398,1.1299828746,-1.3141719276\H,-0.8437115815,0.8187359904,-2.
2116139823\N,-0.2694987893,0.287928426,1.0170161437\H,0.1234302935,1.1
088686744,1.4612016406\C,0.3483491678,-0.9326920773,1.2073827818\O,0.1
602307009,-1.9117506781,0.5199583904\H,0.9874560479,-0.9179500976,2.11
08760269\|Version=IA64L-G03RevC.02\State=1-A\HF=-338.5407411\RMSD=4.03
0e-09\RMSF=1.090e-04\Dipole=-0.9769546,0.6739267,0.6846318\PG=C01 [X(C

```

2H4N2O2) ]\ \@

n.NHCOCH3-NHCOCH3

1\1\GINC-AC23\FOpt\RB3LYP\Gen\C4H8N2O2\CYL509\21-Aug-2008\0\#B3LYP/GEN 6D INT (GRID=ULTRAFINE) OPT FREQ=NORAMAN MAXDISK=1342177280\ \n.NHCOCH3.freq\0,1\N,-0.5751211114,-0.745458936,-0.7098356538\H,-1.5823764353,-0.7982557362,-0.6236097473\C,-0.0344473816,0.2622075381,-1.5057195789\O,1.1215376292,0.6217052597,-1.3811675114\C,-0.9887449605,0.8132220961,-2.5473991694\H,-0.4240106675,1.0693941784,-3.4460314236\H,-1.4434955651,1.7311995532,-2.1570635029\H,-1.7890215265,0.1121143646,-2.8045802173\N,0.0881797106,-1.0797266707,0.4655925913\H,0.9436026499,-1.5961165095,0.303169488\C,0.0596564774,-0.1676198853,1.5184055261\O,-0.7609577309,0.7300062921,1.562099792\C,1.0909720351,-0.43021621,2.5986042374\H,1.9617892145,0.2103916988,2.4165447062\H,0.6668567904,-0.1596809866,3.5676347997\H,1.4259891369,-1.4720009637,2.6228329979\ \Version=IA64L-G03RevC.02\State=1-A\HF=-417.1908706\RMSD=4.281e-09\RMSF=6.072e-06\Dipole=-0.2635788,-0.988108,-0.1322731\PG=C01 [X(C4H8N2O2)]\ \@

n.NO2-NO2

1\1\GINC-LC22\FOpt\RB3LYP\Gen\N2O4\CYL509\19-Jun-2008\0\#B3LYP/GEN 6D INT (GRID=ULTRAFINE) OPT FREQ=NORAMAN MAXDISK=1342177280\ \n.NO2.freq\0,1\N,-0.3708249212,0.648999639,0.4828806765\O,0.4295845941,1.4473608235,0.8739055024\O,-1.5552790484,0.522593694,0.5925453708\N,0.3708249212,-0.648999639,-0.4828806765\O,-0.4295845941,-1.4473608235,-0.8739055024\O,1.5552790484,-0.522593694,-0.5925453708\ \Version=IA32L-G03RevC.02\State=1-AG\HF=-410.1682402\RMSD=8.427e-09\RMSF=1.421e-04\Dipole=0.,0.,0.\PG=C02H [SGH(N2),X(O4)]\ \@

n.OCF3-OCF3

1\1\GINC-AC23\FOpt\RB3LYP\Gen\C2F6O2\CYL509\21-Aug-2008\0\#B3LYP/GEN 6D INT (GRID=ULTRAFINE) OPT FREQ=NORAMAN MAXDISK=1342177280\ \n.OCF3.freq\0,1\O,0.5187218102,0.8278353565,0.1119951753\C,1.1554567667,0.1126648315,1.1228425603\F,2.2826228686,-0.4512604658,0.693408725\F,0.3769450566,-0.8373142365,1.6390063036\F,1.4276126195,1.0289243276,2.0467114981\O,0.2300324636,-0.1202151684,-0.9484445365\C,-1.1506118497,-0.108051196,-1.1282347458\F,-1.8066639281,-0.5144633714,-0.0420664781\F,-1.594112497,1.1021125105,-1.4620707711\F,-1.3551934186,-0.9600702442,-2.1278839439\ \Version=IA64L-G03RevC.02\State=1-A\HF=-825.6152611\RMSD=3.158e-09\RMSF=3.267e-05\Dipole=-0.0486124,-0.0457589,0.0542676\PG=C01 [X(C2F6O2)]\ \@

n.OCH2CH3-OCH2CH3

1\1\GINC-AC23\FOpt\RB3LYP\Gen\C4H10O2\CYL509\21-Aug-2008\0\#B3LYP/GEN 6D INT (GRID=ULTRAFINE) OPT FREQ=NORAMAN MAXDISK=1342177280\ \n.OCH2CH3.freq\0,1\O,0.6087186266,-0.5181882417,0.3378727645\C,1.5907103176,0.2292506343,-0.3727257217\C,2.7692075273,-0.708924637,-0.5944171828\H,1.8873116529,1.1059380617,0.2184454739\H,1.1776972774,0.5831772549,-1.3282407323\H,3.5646957233,-0.1841226462,-1.1342466217\H,2.4684314302,-1.5814914982,-1.1831422212\H,3.1711118393,-1.0587023503,0.3616220326\O,-0.4996793536,0.3965534899,0.5884387928\C,-1.6398914999,-0.1742085737,-0.0457254786\C,-2.8093646107,0.7535358681,0.2540060937\H,-1.4666046072,-0.2602802246,-1.1280684549\H,-1.8197291681,-1.1811181117,0.3539608723\H,-3.7224985731,0.3596468539,-0.2049836027\H,-2.9713874482,0.836272038,1.3332629312\H,-2.6253127162,1.7558388926,-0.1459283997\ \Version=IA64L-G03RevC.02\State=1-A\HF=-308.7992199\RMSD=9.854e-09\RMSF=1.007e-05\Dipole=-0.0657666,0.0733709,-0.5586533\PG=C01 [X(C4H10O2)]\ \@

n.OCH3-OCH3

1\1\GINC-AC22\FOpt\RB3LYP\Gen\C2H6O2\CYL509\20-Aug-2008\0\#B3LYP/GEN 6D INT (GRID=ULTRAFINE) OPT FREQ=NORAMAN MAXDISK=2684354560\ \n.OCH3.freq\0,1\O,-0.1419606567,-0.2867213957,0.7371362073\C,1.1598380764,0.0006252547,1.2115195627\H,1.8736242254,-0.7800477136,0.9203079759\H,1.0591041855,0.0158916623,2.3018688341\H,1.5167301834,0.9768846543,0.8579066966\O,-0.0201211893,-0.3593463524,-0.7183721654\C,-1.0388772845,0.4814610593,-1.2255081194\H,-0.8888820726,1.5281842012,-0.9299177377\H,-0.9571184649,0.3886483731,-2.3136065555\H,-2.0325680402,0.1464629234,-0.9027402083\ \Version=IA64L-G03RevC.02\State=1-A\HF=-230.1611229\RMSD=3.742e-09\RMSF=1.380e-05\Dipole=0.1242796,0.4949568,-0.0143433\PG=C01 [X(C2H6O2)]\ \@

n.OCHO-OCHO

1\1\GINC-AC18\FOpt\RB3LYP\Gen\C2H2O4\CYL509\22-Aug-2008\0\#B3LYP/GEN 6D INT (GRID=ULTRAFINE) OPT FREQ=NORAMAN MAXDISK=2684354560\ \n.OCHO-OCHO.freq\0,1\O,0.4975938721,0.8606454741,0.5445708995\C,1.4691179361,-0.0743451079,0.2941711509\O,1.5270139821,-0.8314742432,-0.6262826062\H,2.1829184716,0.0294102506,1.1274889284\O,-0.4875351776,0.8818099108,-0.5177472104\C,-1.4693491692,-0.0492985565,-0.2963115398\O,-1.537096880

5, -0.8327497404, 0.6009478146\H, -2.1813374414, 0.0866005253, -1.126557775  
5\\Version=IA64L-G03RevC.02\State=1-A\HF=-378.214001\RMSD=7.048e-09\RM  
SF=1.051e-04\Dipole=0.0045547, 0.5683532, 0.0084061\PG=C01 [X(C2H2O4)]\@  
e

n.OCOCH3-OCOCH3

1\1\GINC-AC25\FOpt\RB3LYP\Gen\C4H6O4\CYL509\21-Aug-2008\0\#B3LYP/GEN  
6D INT (GRID=ULTRAFINE) OPT FREQ=NORAMAN MAXDISK=1342177280\n.OCOCH3.f  
req\0,1\O, -0.0687027902, 0.7740822787, 0.8472801942\C, 0.9964638628, -0.0  
723294791, 1.1056263084\C, 1.089068456, -0.2483230957, 2.602282381\O, 1.683  
903481, -0.5758927278, 0.2622109548\H, 2.1058378562, -0.5533829934, 2.85473  
87286\H, 0.3938233699, -1.0387443393, 2.9057941013\H, 0.8204005051, 0.66686  
71483, 3.1351304682\O, -0.2401918134, 0.968959017, -0.5702810039\C, -0.9720  
192736, -0.0662417771, -1.1276469975\C, -1.0795417952, 0.1956526881, -2.610  
6749212\O, -1.4047795323, -1.0000143609, -0.5126273476\H, -1.9474498734, -0  
.3410917226, -2.9970329255\H, -1.1612943664, 1.2631286707, -2.8285957645\H  
, -0.176979788, -0.1864004375, -3.1002176127\\Version=IA64L-G03RevC.02\St  
ate=1-A\HF=-456.8691249\RMSD=4.040e-09\RMSF=1.021e-05\Dipole=-0.079141  
2, 0.4465202, 0.0708747\PG=C01 [X(C4H6O4)]\@e

n.Si\_CH3\_3-Si\_CH3\_3

1\1\GINC-LC19\FOpt\RB3LYP\Gen\C6H18Si2\CYL509\19-Jun-2008\0\#B3LYP/GE  
N 6D INT (GRID=ULTRAFINE) OPT FREQ=NORAMAN MAXDISK=1342177280\n.Si\_CH3  
.3.freq\0,1\H, 0.8940428587, -1.5484853769, -2.949675075\C, 0.8919393412,  
-1.5445193805, -1.8521072453\H, 1.9362017704, -1.5838627741, -1.5198981651  
\H, 0.4037213624, -2.4683985951, -1.5196587107\Si, -0.0000147484, 0.0002603  
901, -1.1842467067\C, -1.7838529887, 0.0001252688, -1.8518756954\C, 0.89170  
40506, 1.5454997873, -1.8512994436\H, -1.7884306409, 0.0000458155, -2.94945  
07547\H, -2.3399239583, 0.8848602404, -1.5196025397\H, -2.339910388, -0.884  
5714284, -1.5194232965\H, 1.9361020651, 1.5843688264, -1.5193614465\H, 0.40  
37846742, 2.4692610714, -1.5180306951\H, 0.8934502365, 1.5501967696, -2.948  
8712505\H, -0.8916733926, 1.5499129333, 2.9496143697\C, -0.8900932828, 1.54  
55892826, 1.852046756\H, -1.9344813007, 1.5858522758, 1.5203207862\H, -0.40  
11292089, 2.4688736655, 1.5190657648\Si, 0.0000162773, -0.0002843077, 1.184  
2496175\C, 1.7838523309, -0.0022374944, 1.8518829465\C, -0.8935521571, -1.5  
444294095, 1.8513499056\H, 1.7884277965, -0.0027684882, 2.9494576435\H, 2.3  
39086021, -0.88730611, 1.5191201932\H, 2.3407493699, 0.8821247953, 1.519922  
2391\H, -1.9378137561, -1.5823899848, 1.5189015473\H, -0.4063596412, -2.468  
7768972, 1.5186234075\H, -0.8958490369, -1.5487702177, 2.9489218884\\Versi  
on=IA32L-G03RevC.02\State=1-A\HF=-818.536514\RMSD=4.806e-09\RMSF=3.13  
6e-05\Dipole=0.0000017, -0.0000155, 0.000003\PG=C01 [X(C6H18Si2)]\@e

n.P\_CH3\_2-P\_CH3\_2

1\1\GINC-LC92\FOpt\RB3LYP\Gen\C4H12P2\CYL509\19-Jun-2008\0\#B3LYP/GEN  
6D INT (GRID=ULTRAFINE) OPT FREQ=NORAMAN MAXDISK=1342177280\n.P\_CH3\_2  
.freq\0,1\C, -1.5226667386, 1.1006591668, 1.3688466253\H, -0.915136076, 0.  
9395573931, 2.2664322539\H, -2.3407615102, 0.3731728305, 1.3596345302\H, -1  
.9703085871, 2.0995029772, 1.4208091546\P, 0.5332148811, -0.9677261532, 0.2  
168754057\C, -0.8551674769, -2.1511442499, -0.2113434495\H, -0.4517455714,  
-3.1695163143, -0.242225322\H, -1.3240513683, -1.9283859493, -1.176351907  
5\H, -1.6219971504, -2.1242215583, 0.5695791232\C, 1.5226667386, -1.1006591  
668, -1.3688466253\H, 0.915136076, -0.9395573931, -2.2664322539\H, 2.340761  
5102, -0.3731728305, -1.3596345302\H, 1.9703085871, -2.0995029772, -1.42080  
91546\P, -0.5332148811, 0.9677261532, -0.2168754057\C, 0.8551674769, 2.1511  
442499, 0.2113434495\H, 0.4517455714, 3.1695163143, 0.242225322\H, 1.32405  
13683, 1.9283859493, 1.1763519075\H, 1.6219971504, 2.1242215583, -0.5695791  
232\\Version=IA32L-G03RevC.02\State=1-AG\HF=-842.3722545\RMSD=2.672e-0  
9\RMSF=2.743e-05\Dipole=0., 0., 0.\PG=CI [X(C4H12P2)]\@e

n.SC\_CH3\_2CN-SC\_CH3\_2CN

1\1\GINC-AC23\FOpt\RB3LYP\Gen\C8H12N2S2\CYL509\21-Aug-2008\0\#B3LYP/G  
EN 6D INT (GRID=ULTRAFINE) OPT FREQ=NORAMAN MAXDISK=1342177280\n.SC\_CH  
3\_2CN.freq\0,1\S, -0.4711486606, -0.4951182259, -1.2379535519\C, -2.01511  
63425, -0.5225632385, -0.14234783\C, -1.7030507354, -0.7241426471, 1.345472  
8969\C, -2.8396190677, -1.6935490153, -0.717689569\C, -2.7365732501, 0.7417  
022541, -0.3408614302\H, -1.1645149248, -1.6627804502, 1.4945472027\H, -1.0  
94236186, 0.0916373677, 1.7398437575\H, -2.6412600211, -0.7557172067, 1.911  
4078174\H, -3.0518198978, -1.5548246788, -1.7816023566\H, -3.7924015295, -1  
.7614238084, -0.1826937001\H, -2.2957635832, -2.6329766113, -0.5794175713\  
N, -3.3181503908, 1.7377397947, -0.4787368622\S, 0.7019634402, 1.0733770794  
, -0.5582896767\C, 2.1907715441, 0.2939050523, 0.3135423437\C, 2.942909643,  
-0.6596160674, -0.6291947016\C, 3.058384265, 1.5107035498, 0.7004352079\C,  
1.7741933756, -0.4223513562, 1.5224812045\H, 3.2686773731, -0.1130677019, -  
1.5189276608\H, 2.306745758, -1.4932724304, -0.937934086\H, 3.8230983956, -  
1.0686783117, -0.1203109299\H, 2.5257392105, 2.1864329562, 1.3752497698\H,  
3.9673606742, 1.1646597375, 1.2031853319\H, 3.3472754271, 2.0610596973, -0.  
2002441903\N, 1.4719598534, -1.0031285669, 2.4824167964\\Version=IA64L-GO

3RevC.02\State=1-A\HF=-1217.9327178\RMSD=2.414e-09\RMSF=6.404e-06\Dipole=1.1515743,-0.8215004,-0.3422969\PG=C01 [X(C8H12N2S2)]\@

n.SCH2COOCH3-SCH2COOCH3

1\1\GINC-AC23\FOpt\RB3LYP\Gen\C6H10O4S2\CYL509\21-Aug-2008\0\#B3LYP/GEN 6D INT (GRID=ULTRAFINE) OPT FREQ=NORAMAN MAXDISK=1342177280\n.SCH2COOCH3.freq\0,1\S,-0.6425283571,-1.2447052639,1.303361518\C,1.1355892458,-1.27459731,1.8197741814\C,2.0249342154,-0.6693039319,0.7531692241\O,2.4000665716,0.485656326,0.7518046554\O,2.3043745302,-1.5612529278,-0.2086181729\C,2.9694221656,-1.0284269358,-1.3719143904\H,1.2518791287,-0.7292960061,2.7571454209\H,1.3628455592,-2.3349849391,1.9638244988\H,3.9066998509,-0.5436242272,-1.0886388719\H,2.3108028262,-0.3108371305,-1.8661922357\H,3.1577488518,-1.8881135904,-2.0151301183\S,-1.2510094247,0.7159505937,1.6146671155\C,-0.6311836214,1.6756943275,0.1501298757\C,-1.0108504379,-1.066689766,-1.1803066061\O,-0.2516629955,0.4279293225,-1.8794109944\O,-2.2987390849,1.3043597601,-1.4901153539\C,-2.7588243508,0.710874968,-2.7165690088\H,0.4524809015,1.7616191734,0.2118811333\H,-1.1037439223,2.6548749203,0.2765722595\H,-2.1846048207,1.0915691101,-3.5653941255\H,-2.6570028886,-0.376552515,-2.6751576165\H,-3.8073364487,0.9962947778,-2.8023492084\Version=IA64L-G03RevC.02\State=1-A\HF=-1331.9480343\RMSD=9.229e-09\RMSF=3.469e-06\Dipole=-0.0581964,-0.1054325,-0.5620631\PG=C01 [X(C6H10O4S2)]\@

n.SCH2Ph-SCH2Ph

1\1\GINC-AC24\FOpt\RB3LYP\Gen\C14H14S2\CYL509\21-Aug-2008\0\#B3LYP/GEN 6D INT (GRID=ULTRAFINE) OPT FREQ=NORAMAN MAXDISK=1342177280\n.SCH2Ph.freq\0,1\S,0.9140753783,-0.4734094834,1.953231517\C,-0.7832793019,-1.0196977046,2.500243639\C,-1.8265080496,-1.0578074488,1.4176201279\H,-1.0895695174,-0.3772478039,3.3293128416\H,-0.5878112625,-2.0208785842,2.9030154202\C,-2.7896037274,-0.0446766017,1.3232733353\C,-1.8480769054,-2.0965390426,0.4742781618\C,-3.7465185756,-0.0623105333,0.3053489424\C,-2.8040728705,-2.1181597103,-0.5398085571\C,-3.7557866598,-1.097848202,-0.6293120183\H,-4.5016306505,-1.1149922542,-1.4193316275\H,-2.8105216941,-2.9332388241,-1.2587527702\H,-4.4864869859,0.73158835,0.247376282\H,-1.1070830136,-2.8903275752,0.5367723374\H,-2.7871204193,0.7628266634,2.050926087\S,0.6822304205,1.5398687653,1.5048518741\C,0.2545926904,1.5963225531,-0.3144213272\C,1.3144375373,1.0685011064,-1.2398580056\H,-0.698628352,1.0834705293,-0.454867593\H,0.088189316,2.6697481956,-0.4675827974\C,1.1689425153,-0.1899327863,-1.8371696325\C,2.4641938525,1.8204509957,-1.5225964165\C,2.1493276365,-0.6861928069,-2.6989981585\C,3.4426155883,1.3277261527,-2.3830445806\C,3.2878471109,0.0707020869,-2.9745185799\H,4.0504579813,-0.3134385735,-3.6468094251\H,4.325994736,1.924453618,-2.594887557\H,2.0211399277,-1.6643445031,-3.1552819583\H,2.5921607147,2.79640178,-1.0597301994\H,0.2813513935,-0.7805978776,-1.6256762259\Version=IA64L-G03RevC.02\State=1-A\HF=-1338.3097624\RMSD=4.538e-09\RMSF=4.045e-06\Dipole=-0.7684143,-0.2393808,-0.4801876\PG=C01 [X(C14H14S2)]\@

n.SCH3-SCH3

1\1\GINC-AC20\FOpt\RB3LYP\Gen\C2H6S2\CYL509\20-Aug-2008\0\#B3LYP/GEN 6D INT (GRID=ULTRAFINE) OPT FREQ=NORAMAN MAXDISK=2684354560\n.SCH3.freq\0,1\S,-1.08208995,-0.0791053179,0.3920222463\C,-1.31389933607,1.5419378611,-0.4395083416\H,-2.395715848,1.7044240575,-0.4872432429\H,-0.8526524616,2.3435802558,0.1410033053\H,-0.9099393813,1.5310155392,-1.4546431102\S,0.9879193145,-0.2507845199,0.5403546395\C,1.4655403246,-1.010717349,-1.0618953419\H,2.546730676,-1.1752819695,-1.0073353986\H,1.2483451691,-0.3442792801,-1.9000623116\H,0.9600802299,-1.968544271,-1.2013273125\Version=IA64L-G03RevC.02\State=1-A\HF=-876.2075135\RMSD=4.437e-09\RMSF=7.211e-06\Dipole=0.0840578,0.2945252,-0.8323693\PG=C01 [X(C2H6S2)]\@

n.SO2CH3-SO2CH3

1\1\GINC-AC26\FOpt\RB3LYP\Gen\C2H6O4S2\CYL509\21-Aug-2008\0\#B3LYP/GEN 6D INT (GRID=ULTRAFINE) OPT FREQ=NORAMAN MAXDISK=1342177280\n.SO2CH3.freq\0,1\C,-1.291168118,-1.8558523648,0.3788945007\S,-0.8226673183,-0.1534587274,0.7698684508\O,-1.9520576248,0.7468395621,0.5098297801\O,-0.0903532737,-0.1334667271,2.04646906\H,-0.3946072196,-2.4761451979,0.4049412197\H,-1.758839195,-1.8668902314,-0.607272355\H,-2.0037733915,-2.158160715,1.1506481916\C,1.692061119,1.5454520359,-0.0480041003\S,0.7616773049,0.200590046,-0.8201722481\O,1.582511841,-1.0212068061,-0.8171414762\O,0.0998261851,0.6867821463,-2.0364144458\H,1.0422789806,2.4199585518,0.0182500529\H,2.0237007943,1.2161774476,0.9373080518\H,2.5423052184,1.7417756196,-0.7063001507\Version=IA64L-G03RevC.02\State=1-A\HF=-1176.9611361\RMSD=6.121e-09\RMSF=1.502e-05\Dipole=0.3333147,-0.2583195,0.2753198\PG=C01 [X(C2H6O4S2)]\@

n.SOCH3-SOCH3

1\1\GINC-LC95\FOpt\RB3LYP\Gen\C2H6O2S2\CYL509\19-Jun-2008\0\#\B3LYP/GEN 6D INT (GRID=ULTRAFINE) OPT FREQ=NORAMAN MAXDISK=1342177280\ \n.SOCH3. freq\0,1\,S,-0.3174340495,-0.961676029,0.6005272557\O,0.3014110007,-2.1325375466,-0.1250292738\C,-2.0519226177,-0.7859733212,0.0336037767\H,-2.6603194222,-1.5195519452,0.5686289032\H,-2.0923037467,-0.9778711509,-1.042136198\H,-2.3886844413,0.2295640178,0.264548308\N,0.3174340495,0.961676029,-0.6005272557\O,-0.3014110007,2.1325375466,0.1250292738\C,2.0519226177,0.7859733212,-0.0336037767\H,2.6603194222,1.5195519452,-0.5686289032\H,2.0923037467,0.9778711509,1.042136198\H,2.3886844413,-0.2295640178,-0.264548308\ \Version=IA32L-G03RevC.02\State=1-AG\HF=-1026.5578495\RMSD=6.044e-09\RMSF=1.490e-05\Dipole=0.,0.,0.\PG=CI [X(C2H6O2S2)]\ \@

n.Ph-Ph

1\1\GINC-AC25\FOpt\RB3LYP\Gen\C12H10\CYL509\21-Aug-2008\0\#\B3LYP/GEN 6D INT (GRID=ULTRAFINE) OPT FREQ=NORAMAN MAXDISK=1342177280\ \n.Ph.freq\0,1\C,-0.2535330755,-0.1317328582,-0.6857604922\C,-1.2162131794,-0.6319075148,-3.2897513822\C,-0.523116221,0.9248587429,-1.5721831848\C,-0.4773404609,-1.4446800651,-1.1339654262\C,-0.9537155681,-1.6923506276,-2.4205427837\C,-0.9982620647,0.6781549403,-2.8594006942\H,-0.3830977558,1.9493848016,-1.2386201786\H,-0.2505895369,-2.278654443,-0.4754876557\H,-1.1115131528,-2.7169037402,-2.7474693192\H,-1.2071752606,1.5121746026,-3.5244244433\H,-1.5870511013,-0.8245819956,-4.292846998\C,0.2535273516,0.1317147095,0.6857660944\C,1.2162169766,0.6319195539,3.2897476661\C,-0.182138716,-0.6379723544,1.7778213668\C,1.182590901,1.1577794828,0.928331633\C,1.6581526085,1.4057967816,2.2151430952\C,0.2938294173,-0.3915872382,3.0647960972\H,-0.9203370673,-1.4191623242,1.6186747221\H,1.5540194255,1.7484164236,0.0954379155\H,2.3826002464,2.1998484411,2.3768455711\H,-0.0639023859,-0.9950894002,3.8950389606\H,1.5870587713,0.824606318,4.2928394897\ \Version=IA64L-G03RevC.02\State=1-A\HF=-463.306066\RMSD=2.336e-09\RMSF=5.028e-06\Dipole=0.0000016,0.000005,-0.000015\PG=C01 [X(C12H10)]\ \@

n.C6H4CN-C6H4CN

1\1\GINC-AC25\FOpt\RB3LYP\Gen\C14H8N2\CYL509\20-Aug-2008\0\#\B3LYP/GEN 6D INT (GRID=ULTRAFINE) OPT FREQ=NORAMAN MAXDISK=1342177280\ \n.C6H4CN. freq\0,1\C,-0.2648221965,-0.1328821253,-0.6798354274\C,-1.2711771575,-0.6378419635,-3.2632825528\C,-0.3127270734,0.8865616222,-1.6472062301\C,-0.7320410869,-1.410792075,-1.0348264251\C,-1.2288548246,-1.6660822851,-2.3072066773\C,-0.8083443534,0.6438813754,-2.9225174321\H,0.0165448206,1.8882668211,-1.3885623553\H,-0.6798158694,-2.2210664593,-0.3140917819\H,-1.5773280645,-2.6592363332,-2.5712990374\H,-0.8487536229,1.419108502,-3.6567172808\C,-1.7830192883,-0.8946858871,-4.5773075872\N,-2.1982804123,-1.1031958339,-5.6438631552\C,0.2648190154,0.13287745,0.6798375793\C,1.2711673216,0.637825362,3.263289629\C,-0.3169512757,-0.467433094,1.8105614193\C,1.3617066011,0.9916425509,0.8714803414\C,1.8627782304,1.244088817,2.1427579919\C,0.1744001942,-0.2219230708,3.086981077\H,-1.181990757,-1.112506744,1.6909070816\H,1.8452487724,1.4452850283,0.0117563097\H,2.7159381856,1.9012935737,2.2759246429\H,-0.2898823138,-0.6840122572,3.9521103636\C,1.7830127818,0.894674292,4.5773123871\N,2.1983314865,1.1032815065,5.6438265124\ \Version=IA64L-G03RevC.02\State=1-A\HF=-647.7920264\RMSD=1.304e-09\RMSF=3.507e-06\Dipole=-0.0000358,-0.0000605,0.0000258\PG=C01 [X(C14H8N2)]\ \@

n.C6H4NO2-C6H4NO2

1\1\GINC-AC24\FOpt\RB3LYP\Gen\C12H8N2O4\CYL509\21-Aug-2008\0\#\B3LYP/GEN 6D INT (GRID=ULTRAFINE) OPT FREQ=NORAMAN MAXDISK=1342177280\ \n.C6H4NO2. freq\0,1\C,-0.2523806564,-0.1313343775,-0.6849928857\C,-1.2006132492,-0.6247626101,-3.2587211514\C,-0.9710584541,0.8530683874,-1.3877387017\C,-0.0231351275,-1.3704217962,-1.3106981167\C,-0.493511344,-1.624425277,-2.5942028029\C,-1.4468197339,0.6147344623,-2.6722633618\H,-1.135470256,1.8254881316,-0.9342977177\H,0.5053396783,-2.1533959384,-0.7759964875\H,-0.3307710401,-2.578022846,-3.081035278\H,-1.9927235851,1.3689466002,-3.225428392\N,-1.7013009652,-0.8853038932,-4.6177067421\O,-2.3253563304,0.0152814811,-5.1777096578\O,-1.4652057592,-1.9877671964,-5.110592364\C,0.2523690162,0.131319215,0.685000198\C,1.2006166839,0.62476172,3.2587202139\C,-0.5111524114,0.8763311492,1.6022735595\C,1.5053378568,-0.3589940279,1.0961696061\C,1.9855915738,-0.1165054498,2.3782425697\C,-0.0452592494,1.1261891247,2.8882247245\H,-1.4923800155,1.2406187904,1.3146507973\H,2.1225017088,-0.912728089,0.3956501537\H,2.952709804,-0.48119656,2.7015400682\H,-0.6292075996,1.6902714871,3.60492128\N,1.7013124356,0.8853104763,4.6177012456\O,0.9873550793,1.5458836923,5.3713656631\O,2.803208458,0.4266281756,4.9169302265\ \Version=IA64L-G03RevC.02\State=1-A\HF=-872.3081118\RMSD=3.861e-09\RMSF=2.106e-05\Dipole=0.0000064,-0.0000098,0.0000005\PG=C01 [X(C12H8N2O4)]\ \@

n.C6H4OCH3-C6H4OCH3

1\1\GINC-AC24\FOpt\RB3LYP\Gen\C14H14O2\CYL509\21-Aug-2008\0\#B3LYP/GE  
N 6D INT (GRID=ULTRAFINE) OPT FREQ=NORAMAN MAXDISK=1342177280\n.C6H4OC  
H3.freq\0,1\C,-3.0724577871,0.030339441,0.5046183948\C,-3.0238896139,  
-0.0588576325,1.9033400813\C,-1.7817191423,-0.1458471469,2.541100454\C  
, -0.6112459071, -0.1398791503, 1.7793976214\C, -0.6365531181, -0.053189235  
4, 0.3807269041\C, -1.8997097641, 0.030474952, -0.2370235598\O, -4.23145773  
76, -0.0538065468, 2.5426183825\C, -4.2398446424, -0.1499744676, 3.95707284  
95\H, -1.9619661004, 0.0710520969, -1.321022715\H, 0.344783565, -0.17869644  
35, 2.2944438372\H, -1.7105332301, -0.2058463147, 3.6212901979\H, -4.043415  
517, 0.0857497196, 0.0219577298\H, -3.7814099484, -1.0866052049, 4.30186299  
36\H, -5.2905925456, -0.13338625, 4.2527339757\H, -3.7193753007, 0.69720316  
11, 4.4236781915\C, 2.8958625499, -0.8313152217, -0.7864039045\C, 3.0028439  
729, -0.0365818175, -1.9369216709\C, 1.915341133, 0.7519470922, -2.32788539  
57\C, 0.7433853417, 0.7392554614, -1.5685481867\C, 0.6141354833, -0.0484687  
758, -0.4164976724\C, 1.7222803275, -0.8352313885, -0.0460930359\O, 4.19676  
14488, -0.1035425424, -2.5979816904\C, 4.3554906764, 0.674412201, -3.772541  
7511\H, 1.65120825, -1.4805562456, 0.8251595804\H, -0.0798218219, 1.3805257  
93, -1.8716554782\H, 1.9704132474, 1.3846294146, -3.2066102355\H, 3.7432865  
563, -1.4470491674, -0.5008609009\H, 4.2585016944, 1.7482385338, -3.5632380  
733\H, 5.3644988036, 0.468430254, -4.1348066211\H, 3.6284756011, 0.39259749  
68, -4.5460727871\Version=IA64L-G03RevC.02\State=1-A\HF=-692.3512891\R  
MSD=9.250e-09\RMSF=9.972e-06\Dipole=0.0599826,0.2720087,0.0957116\PG=C  
01 [X(C14H14O2)]\@

n.C6H4OH-C6H4OH

1\1\GINC-AC24\FOpt\RB3LYP\Gen\C12H10O2\CYL509\21-Aug-2008\0\#B3LYP/GE  
N 6D INT (GRID=ULTRAFINE) OPT FREQ=NORAMAN MAXDISK=1342177280\n.C6H4OH  
.freq\0,1\C,-3.0238085054,-0.5444879421,0.4825550173\C,-3.0927260951,  
-0.0258060898,1.7797086348\C,-1.9425995992,0.5035870431,2.3724359845\C  
, -0.7376352259, 0.5096574422, 1.6724605146\C, -0.643407684, -0.0031734883,  
0.3690605684\C, -1.815854029, -0.5275458229, -0.2056259136\O, -4.304877665  
9, -0.0638785531, 2.4137840503\H, -1.7860626098, -0.9073281318, -1.22319215  
2\H, 0.1516561405, 0.8984457556, 2.1606926217\H, -1.9847996964, 0.899700310  
2, 3.385896666\H, -3.9250339425, -0.943069597, 0.0271835702\H, -4.210952357  
3, 0.3324664865, 3.2938767834\C, 2.7512773217, 1.0980339196, -0.9473882656\  
C, 3.091525007, 0.0282451717, -1.7817572269\C, 2.211686352, -1.0501366937, -  
1.913477597\C, 1.006410782, -1.0555742199, -1.2140328912\C, 0.6415444934, 0  
.0069604973, -0.3722384137\C, 1.5432676213, 1.0812055536, -0.2593015091\O,  
4.2904000151, 0.0932831467, -2.4384774079\H, 1.280882798, 1.9334148384, 0.3  
615499999\H, 0.3492022863, -1.9157530602, -1.3064210117\H, 2.4733907801, -1  
.8920915733, -2.5525487079\H, 3.436350416, 1.9356471403, -0.8606892551\H, 4  
.3931047581, -0.7024611423, -2.9831950695\Version=IA64L-G03RevC.02\Stat  
e=1-A\HF=-613.7382482\RMSD=3.753e-09\RMSF=1.425e-05\Dipole=0.1165518, -  
0.2367438, 0.1987927\PG=C01 [X(C12H10O2)]\@

n.CF2CF3-CF2CF3

1\1\GINC-AC23\FOpt\RB3LYP\Gen\C4F10\CYL509\21-Aug-2008\0\#B3LYP/GEN 6  
D INT (GRID=ULTRAFINE) OPT FREQ=NORAMAN MAXDISK=1342177280\n.CF2CF3.fr  
eq\0,1\F,0.3727175063,0.5458781224,-1.6921575321\C,0.4097989774,0.569  
6397573,-0.341211719\C,1.8984291954,0.6135666282,0.0945760529\F,-0.181  
6988556,1.7059961972,0.0997688369\F,2.4951009131,-0.5575978494,-0.1655  
717874\F,1.9971628323,0.8753391417,1.4020384928\F,2.522820229,1.579969  
8912,-0.5884283024\F,-0.1224326502,-0.8056327767,1.5131123788\C,-0.381  
7035636,-0.6529130364,0.1921063346\C,-1.9206152392,-0.5478338735,0.023  
1392327\F,0.0351985338,-1.7539828035,-0.4718511774\F,-2.4207310166,0.3  
797043226,0.8461276038\F,-2.2301395606,-0.2272708135,-1.2404783567\F,-  
2.4719375116,-1.7307097488,0.3183665763\Version=IA64L-G03RevC.02\Stat  
e=1-A\HF=-1150.8139049\RMSD=8.772e-09\RMSF=4.162e-06\Dipole=-0.0016365  
,0.004788,0.0085901\PG=C01 [X(C4F10)]\@

n.CF2H-CF2H

1\1\GINC-LC69\FOpt\RB3LYP\Gen\C2H2F4\CYL509\19-Jun-2008\0\#B3LYP/GEN  
6D INT (GRID=ULTRAFINE) OPT FREQ=NORAMAN MAXDISK=1342177280\n.CF2H.fre  
q\0,1\C,-0.0142050539,-0.0161375781,-0.7617910786\H,0.9940534256,0.03  
27246864,-1.1869555257\F,-0.7457428655,1.0408558311,-1.2038653591\F,-0  
.6200865292,-1.1662183237,-1.1594479899\C,0.0142050539,0.0161375781,0.  
7617910786\H,-0.9940534256,-0.0327246864,1.1869555257\F,0.7457428655,-  
1.0408558311,1.2038653591\F,0.6200865292,1.1662183237,1.1594479899\Ve  
rsion=IA32L-G03RevC.02\State=1-AG\HF=-476.7604858\RMSD=6.532e-09\RMSF=  
3.380e-04\Dipole=0.,0.,0.\PG=CI [X(C2H2F4)]\@

n.CF3-CF3

1\1\GINC-LC99\FOpt\RB3LYP\Gen\C2F6\CYL509\19-Jun-2008\0\#B3LYP/GEN 6D  
INT (GRID=ULTRAFINE) OPT FREQ=NORAMAN MAXDISK=1342177280\n.CF3.freq\0,  
1\F,0.3722442538,0.6429946437,-1.5925929648\C,0.378737505,0.62279447  
44,-0.2545186873\F,1.6451926612,0.5919686897,0.1767919865\F,-0.2127867  
337,1.7325959224,0.2030464515\F,-0.3722442538,-0.6429946437,1.59259296

48\C,-0.378737505,-0.6227944744,0.2545186873\F,-1.6451926612,-0.591968  
6897,-0.1767919865\F,0.2127867337,-1.7325959224,-0.2030464515\\Version  
=IA32L-G03RevC.02\State=1-AG\HF=-675.2549087\RMSD=5.320e-09\RMSF=1.437  
e-05\Dipole=0.,0.,0.\PG=CI [X(C2F6)]\\@

n.CC12H-CC12H

1\1\GINC-LC95\FOpt\RB3LYP\Gen\C2H2C14\CYL509\19-Jun-2008\0\#B3LYP/GEN  
6D INT (GRID=ULTRAFINE) OPT FREQ=NORAMAN MAXDISK=1342177280\\n.CC12H.f  
req\\0,1\C,-0.00119739,-0.0000001682,-0.7698959974\C,0.00119739,0.0000  
001682,0.7698959974\C1,0.8244651786,1.4689963454,1.3980854913\C1,0.824  
4636386,-1.4689967453,1.3980860573\C1,-0.8244636386,1.4689967453,-1.39  
80860573\C1,-0.8244651786,-1.4689963454,-1.3980854913\H,1.0162972677,-  
0.0000007394,-1.1566557522\H,-1.0162972677,0.0000007394,1.1566557522\\  
Version=IA32L-G03RevC.02\State=1-AG\HF=-1918.1859928\RMSD=5.592e-09\RM  
SF=1.489e-04\Dipole=0.,0.,0.\PG=CI [X(C2H2C14)]\\@

n.CC13-CC13

1\1\GINC-LC39\FOpt\RB3LYP\Gen\C2C16\CYL509\19-Jun-2008\0\#B3LYP/GEN 6  
D INT (GRID=ULTRAFINE) OPT FREQ=NORAMAN MAXDISK=1342177280\\n.CC13.freq  
\0,1\C,0.,0.,-0.7974998675\C,0.,0.,0.7974998675\C1,0.8438872745,1.459  
9354095,1.4070136025\C1,0.8423975153,-1.4607955224,1.4070136025\C1,-1.  
6862847897,0.0008601129,1.4070136025\C1,1.686284791,0.0008576657,-1.40  
70136025\C1,-0.8438851557,1.4599366342,-1.4070136025\C1,-0.8423996352,  
-1.4607942998,-1.4070136025\\Version=IA32L-G03RevC.02\State=1-A1\HF=-2  
837.3350256\RMSD=1.068e-09\RMSF=7.448e-05\Dipole=0.,0.,0.\PG=D03 [C3(C  
1.C1),X(C16)]\\@

n.CH2C1-CH2C1

1\1\GINC-LC120\FOpt\RB3LYP\Gen\C2H4C12\CYL509\19-Jun-2008\0\#B3LYP/GE  
N 6D INT (GRID=ULTRAFINE) OPT FREQ=NORAMAN MAXDISK=1342177280\\n.CH2C1.  
freq\\0,1\C,0.009109198,0.0185678912,-0.7591298697\C,-0.009109198,-0.0  
185678912,0.7591298697\C1,0.84113227,1.4502492354,1.4018612268\C1,-0.8  
4113227,-1.4502492354,-1.4018612268\H,1.0276026525,0.0010441058,-1.147  
9331339\H,-1.0276026525,-0.0010441058,1.1479331339\H,-0.5157435102,0.8  
930532252,-1.1445998231\H,0.5157435102,-0.8930532252,1.1445998231\\Ver  
sion=IA32L-G03RevC.02\State=1-AG\HF=-999.0190105\RMSD=7.838e-09\RMSF=1  
.334e-04\Dipole=0.,0.,0.\PG=CI [X(C2H4C12)]\\@

n.CH2F-CH2F

1\1\GINC-LC22\FOpt\RB3LYP\Gen\C2H4F2\CYL509\19-Jun-2008\0\#B3LYP/GEN  
6D INT (GRID=ULTRAFINE) OPT FREQ=NORAMAN MAXDISK=1342177280\\n.CH2F.fre  
q\\0,1\C,0.1173701396,0.273625964,-0.6994470708\F,1.4872535847,0.35615  
83197,-0.910419247\H,-0.3244310523,1.2714763444,-0.8013783002\H,-0.324  
4318545,-0.3901733744,-1.4514211973\C,-0.1173701396,-0.273625964,0.699  
4470708\F,-1.4872535847,-0.3561583197,0.910419247\H,0.3244310523,-1.27  
14763444,0.8013783002\H,0.3244318545,0.3901733744,1.4514211973\\Versio  
n=IA32L-G03RevC.02\State=1-AG\HF=-278.2779908\RMSD=1.705e-09\RMSF=1.32  
8e-04\Dipole=0.,0.,0.\PG=C02H [SGH(C2F2),X(H4)]\\@

n.CH2OH-CH2OH

1\1\GINC-AC28\FOpt\RB3LYP\Gen\C2H6O2\CYL509\20-Jun-2008\0\#B3LYP/GEN  
6D INT (GRID=ULTRAFINE) OPT FREQ=NORAMAN MAXDISK=2684354560\\n.CH2OH.fr  
eq\\0,1\C,-0.023959809,-0.0000001587,0.7597476616\O,1.3216095047,0.000  
0000831,1.2204975054\H,-0.5767255984,-0.8890897698,1.1003667947\H,-0.5  
767260404,0.8890890406,1.1003671522\H,1.3039109993,-0.0000001159,2.188  
4919451\C,0.023959809,0.0000001587,-0.7597476616\O,-1.3216095047,-0.00  
0000831,-1.2204975054\H,0.5767255984,0.8890897698,-1.1003667947\H,0.5  
767260404,-0.8890890406,-1.1003671522\H,-1.3039109993,0.0000001159,-2.  
1884919451\\Version=IA64L-G03RevC.02\State=1-AG\HF=-230.235715\RMSD=2.  
278e-09\RMSF=7.716e-05\Dipole=0.,0.,0.\PG=C02H [SGH(C2H2O2),X(H4)]\\@

n.CH2Ph-CH2Ph

1\1\GINC-AC2\FOpt\RB3LYP\Gen\C14H14\CYL509\20-Jun-2008\0\#B3LYP/GEN 6  
D INT (GRID=ULTRAFINE) OPT FREQ=NORAMAN MAXDISK=2684354560\\n.CH2Ph.fre  
q\\0,1\C,0.7719934193,0.076619868,0.\C,1.4912646618,-1.2547134436,0.\C  
,1.8166655361,-1.8963839611,1.2028901701\C,1.8166655361,-1.8963839611,  
-1.2028901701\C,2.4459337286,-3.1418366055,1.206051423\C,2.4459337286,  
-3.1418366055,-1.206051423\C,2.7620054033,-3.7699228833,0.\H,3.2546978  
579,-4.7385805445,0.\H,2.6935440309,-3.6194761686,2.1506666425\H,2.693  
5440309,-3.6194761686,-2.1506666425\H,1.5794616285,-1.4103541352,2.147  
293162\H,1.5794616285,-1.4103541352,-2.147293162\H,1.0660893357,0.6637  
277558,-0.878992584\H,1.0660893357,0.6637277558,0.878992584\C,-0.77199  
34193,-0.076619868,0.\C,-1.4912646618,1.2547134436,0.\C,-1.8166655361,  
1.8963839611,-1.2028901701\C,-1.8166655361,1.8963839611,1.2028901701\C  
,-2.4459337286,3.1418366055,-1.206051423\C,-2.4459337286,3.1418366055,  
1.206051423\C,-2.7620054033,3.7699228833,0.\H,-3.2546978579,4.73858054  
45,0.\H,-2.6935440309,3.6194761686,-2.1506666425\H,-2.6935440309,3.619



4761686,2.1506666425\H,-1.5794616285,1.4103541352,-2.147293162\H,-1.5794616285,1.4103541352,2.147293162\H,-1.0660893357,-0.6637277558,0.878992584\H,-1.0660893357,-0.6637277558,-0.878992584\Version=IA64L-G03RevC.02\State=1-AG\HF=-541.9303591\RMSD=4.486e-09\RMSF=4.187e-05\Dipole=0.,0.,0.\PG=C02H [SGH(C6H2),X(C8H12)]\e

n.CH\_CH2\_2-CH\_CH2\_2

1\1\GINC-LC95\FOpt\RB3LYP\Gen\C6H10\CYL509\19-Jun-2008\0\#B3LYP\GEN 6D INT (GRID=ULTRAFINE) OPT FREQ=NORAMAN MAXDISK=1342177280\n.CH\_CH2\_2.freq\0,1\C,-1.733742743,-0.6662955878,-0.7408567606\C,-1.7242590191,-0.6578899942,0.7698815434\C,-0.4209579353,-0.6203332594,0.0060772017\H,0.1559150583,-1.545092106,0.0075991048\H,-2.0399970597,0.2514013539,1.275939402\H,-1.9927618685,-1.5707303159,1.2951810601\H,-2.0558448916,0.2373341446,-1.2530090714\H,-2.0087812438,-1.5849064067,-1.2525393208\C,1.733742743,0.6662955878,0.7408567606\C,1.7242590191,0.6578899942,-0.7698815434\C,0.4209579353,0.6203332594,-0.0060772017\H,-0.1559150583,1.545092106,-0.0075991048\H,2.0399970597,-0.2514013539,-1.275939402\H,1.9927618685,1.5707303159,-1.2951810601\H,2.0558448916,-0.2373341446,1.2530090714\H,2.0087812438,1.5849064067,1.2525393208\Version=IA32L-G03RevC.02\State=1-AG\HF=-234.5932348\RMSD=9.295e-09\RMSF=2.256e-05\Dipole=0.,0.,0.\PG=CI [X(C6H10)]\e

n.CH2CH=CH2-CH2CH=CH2

1\1\GINC-LC128\FOpt\RB3LYP\Gen\C6H10\CYL509\19-Jun-2008\0\#B3LYP\GEN 6D INT (GRID=ULTRAFINE) OPT FREQ=NORAMAN MAXDISK=1342177280\n.CH2CH=CH2\_2.freq\0,1\C,-0.3277666278,0.5526000621,0.4317384366\C,0.3026424482,1.9022289401,0.2223882928\H,-0.2393276792,0.2606339271,1.4882862228\H,-1.401505269,0.6060917587,0.2087913041\H,1.3642628,1.9723734203,0.4677669455\C,-0.3258370014,2.9824207952,-0.2427938503\H,0.1871831294,3.9309028257,-0.3785726581\H,-1.3827170547,2.9609426766,-0.5024083189\C,0.3277666278,-0.5526000621,-0.4317384366\C,-0.3026424482,-1.9022289401,-0.2223882928\H,0.2393276792,-0.2606339271,-1.4882862228\H,1.401505269,-0.6060917587,-0.2087913041\H,-1.3642628,-1.9723734203,-0.4677669455\C,0.3258370014,-2.9824207952,0.2427938503\H,-0.1871831294,-3.9309028257,0.3785726581\H,1.3827170547,-2.9609426766,0.5024083189\Version=IA32L-G03RevC.02\State=1-AG\HF=-234.6117105\RMSD=2.894e-09\RMSF=7.994e-06\Dipole=0.,0.,0.\PG=CI [X(C6H10)]\e

n.CH2CH3-CH2CH3

1\1\GINC-LC95\FOpt\RB3LYP\Gen\C4H10\CYL509\19-Jun-2008\0\#B3LYP\GEN 6D INT (GRID=ULTRAFINE) OPT FREQ=NORAMAN MAXDISK=1342177280\n.CH2CH3.freq\0,1\C,-0.2795440659,0.5790345545,0.4182617103\H,0.3113481156,1.4850836498,0.2205872128\C,-0.2867642822,0.2911749358,1.9227093611\H,-1.3019325045,0.8057191639,0.0828620486\H,0.7269906311,0.0950969408,2.293689111\H,-0.8984203633,-0.5895874023,2.1548852412\H,-0.6912805878,1.1361296721,2.4916536272\C,0.2795440659,-0.5790345545,-0.4182617103\H,-0.3113481156,-1.4850836498,-0.2205872128\C,0.2867642822,-0.2911749358,-1.9227093611\H,1.3019325045,-0.8057191639,-0.0828620486\H,-0.7269906311,-0.0950969408,-2.293689111\H,0.8984203633,0.5895874023,-2.1548852412\H,0.6912805878,-1.1361296721,-2.4916536272\Version=IA32L-G03RevC.02\State=1-AG\HF=-158.4580441\RMSD=9.999e-09\RMSF=5.061e-05\Dipole=0.,0.,0.\PG=CI [X(C4H10)]\e

n.CH\_CH3\_2-CH\_CH3\_2

1\1\GINC-LC92\FOpt\RB3LYP\Gen\C6H14\CYL509\19-Jun-2008\0\#B3LYP\GEN 6D INT (GRID=ULTRAFINE) OPT FREQ=NORAMAN MAXDISK=1342177280\n.CH\_CH3\_2.freq\0,1\C,-1.5298385233,1.1549090689,0.4532158066\H,-1.2526307314,1.4050382845,1.4862239822\H,-2.6118643886,0.9787288039,0.4371035925\H,-1.3328643736,2.0339296119,-0.1679345976\C,-0.7704410671,-0.0918137196,-0.0325564178\H,-1.0334488961,-0.2541181784,-1.0906582894\C,-1.2479994752,-1.3191956052,0.7626703323\H,-0.8446279192,-2.2567455687,0.3682623748\H,-2.3413404801,-1.3960382028,0.7347415404\H,-0.9503724472,-1.2431125159,1.8172479426\C,1.5298385233,-1.1549090689,-0.4532158066\H,1.2526307314,-1.4050382845,-1.4862239822\H,2.6118643886,-0.9787288039,-0.4371035925\H,1.3328643736,-2.0339296119,0.1679345976\C,0.7704410671,0.0918137196,0.0325564178\H,1.0334488961,0.2541181784,1.0906582894\C,1.2479994752,1.3191956052,-0.7626703323\H,0.8446279192,2.2567455687,-0.3682623748\H,2.3413404801,1.3960382028,-0.7347415404\H,0.9503724472,1.2431125159,-1.8172479426\Version=IA32L-G03RevC.02\State=1-AG\HF=-237.0825054\RMSD=3.012e-09\RMSF=3.441e-05\Dipole=0.,0.,0.\PG=CI [X(C6H14)]\e

n.C\_CH3\_3-C\_CH3\_3

1\1\GINC-AC23\FOpt\RB3LYP\Gen\C8H18\CYL509\21-Aug-2008\0\#B3LYP\GEN 6D INT (GRID=ULTRAFINE) OPT FREQ=NORAMAN MAXDISK=1342177280\n.C\_CH3\_3.freq\0,1\C,0.1016681754,-0.0363947887,1.9767046785\C,0.3245355057,0.486367732,0.5387781876\C,-0.2872432553,1.9041663944,0.4592970735\H,0.6581793572,0.5852306376,2.6885708876\H,0.4510474688,-1.0670114884,2.10398

71662\H,-0.9527736518,0.0004944139,2.2692314267\C,1.8496259101,0.62525  
02647,0.3256362353\H,2.2515723239,1.3885873857,1.0028714963\H,2.101047  
7344,0.9328582137,-0.6954658748\H,2.381353118,-0.3082319653,0.53691678  
61\H,0.0886531794,2.5181171633,1.2867257458\H,-1.3801419424,1.89090342  
77,0.5357695463\H,-0.0207450151,2.4157794717,-0.4712666129\C,-0.363323  
4947,0.1689998953,-1.9386518644\C,-0.3247482339,-0.4863645576,-0.53881  
8892\C,0.4758716155,-1.8031261002,-0.6637223455\H,-0.7027646434,-0.562  
280341,-2.6822186339\H,-1.0556033795,1.0163179482,-1.977379736\H,0.622  
3762013,0.5238953145,-2.2593387065\C,-1.7765525486,-0.8589190268,-0.15  
92842381\H,-2.2388414129,-1.4297370666,-0.9737473511\H,-1.8197676895,-  
1.4828211971,0.7393848259\H,-2.4014210761,0.0243914496,0.013070625\H,-  
0.0554233746,-2.5000431528,-1.3231915606\H,1.4690823594,-1.6414632549,  
-1.0951848047\H,0.6051683979,-2.3048658385,0.3016317656\Version=IA64L  
-G03RevC.02\State=1-A\HF=-315.701357\RMSD=4.246e-09\RMSF=3.227e-05\Dip  
ole=0.0000358,0.0000673,0.0000645\PG=C01 [X(C8H18)]\@

n.CCH-CCH

1\1\GINC-LC39\FOpt\RB3LYP\Gen\C4H2\CYL509\19-Jun-2008\0\#B3LYP\GEN 6D  
INT (GRID=ULTRAFINE) OPT FREQ=NORAMAN MAXDISK=1342177280\#n.CCH.freq\0,  
1\C,-0.2457508885,-0.1227024082,-0.6269799923\C,-0.6810070316,-0.340  
0240107,-1.7374414639\H,-1.0638578554,-0.5311798528,-2.7142021503\C,0.  
2457508885,0.1227024082,0.6269799923\C,0.6810070316,0.3400240107,1.737  
4414639\H,1.0638578554,0.5311798528,2.7142021503\Version=IA32L-G03Rev  
C.02\State=1-SGG\HF=-153.4816432\RMSD=4.924e-09\RMSF=7.907e-05\Dipole=  
0.,0.,0.\PG=D\*H [\*(H1C1C1.C1C1H1)]\@

n.CH=C\_CH3\_2-CH=C\_CH3\_2

1\1\GINC-LC22\FOpt\RB3LYP\Gen\C8H14\CYL509\19-Jun-2008\0\#B3LYP\GEN 6  
D INT (GRID=ULTRAFINE) OPT FREQ=NORAMAN MAXDISK=1342177280\#n.CH=C\_CH3\_  
2.freq\0,1\C,-0.2045787358,-0.1903848545,-0.6711375784\C,0.5884345953  
,-0.3497758647,-1.7540203671\H,-1.2681634208,-0.3668653588,-0.82140994  
56\C,2.0837129559,-0.1565176461,-1.7683250213\C,-0.0004209392,-0.75106  
82816,-3.0837965506\H,0.436722336,-1.6938487949,-3.4438345977\H,0.2134  
528534,0.0016342928,-3.8566209951\H,-1.0860176137,-0.8807527233,-3.029  
2786962\H,2.366663072,0.6152664925,-2.4983542614\H,2.5896868133,-1.079  
7053527,-2.0851394854\H,2.4965480586,0.133879246,-0.8000484994\C,0.204  
5787358,0.1903848545,0.6711375784\C,-0.5884345953,0.3497758647,1.75402  
03671\H,1.2681634208,0.3668653588,0.8214099456\C,-2.0837129559,0.15651  
76461,1.7683250213\C,0.0004209392,0.7510682816,3.0837965506\H,-0.43672  
2336,1.6938487949,3.4438345977\H,-0.2134528534,-0.0016342928,3.8566209  
951\H,1.0860176137,0.8807527233,3.0292786962\H,-2.366663072,-0.6152664  
925,2.4983542614\H,-2.5896868133,1.0797053527,2.0851394854\H,-2.496548  
0586,-0.133879246,0.8000484994\Version=IA32L-G03RevC.02\State=1-AG\HF  
=-313.2656567\RMSD=6.581e-09\RMSF=6.223e-05\Dipole=0.,0.,0.\PG=CI [X(C  
8H14)]\@

n.CH=CH2-CH=CH2

1\1\GINC-LC10\FOpt\RB3LYP\Gen\C4H6\CYL509\19-Jun-2008\0\#B3LYP\GEN 6D  
INT (GRID=ULTRAFINE) OPT FREQ=NORAMAN MAXDISK=1342177280\#n.CH=CH2.fre  
q\0,1\C,-0.2586689036,-0.1429780849,-0.6661603549\C,0.5064115581,-0.3  
001164933,-1.7556103793\H,-1.3420823882,-0.2296128563,-0.7545853977\H,  
1.5903701143,-0.2207272816,-1.705756052\H,0.0790418678,-0.5125294454,-  
2.7308626872\C,0.2586689036,0.1429780849,0.6661603549\C,-0.5064115581,  
0.3001164933,1.7556103793\H,1.3420823882,0.2296128563,0.7545853977\H,-  
1.5903701143,0.2207272816,1.705756052\H,-0.0790418678,0.5125294454,2.7  
308626872\Version=IA32L-G03RevC.02\State=1-AG\HF=-155.9921396\RMSD=2.  
651e-09\RMSF=5.355e-05\Dipole=0.,0.,0.\PG=CI [X(C4H6)]\@

n.CH=CHCH3-CH=CHCH3

1\1\GINC-LC99\FOpt\RB3LYP\Gen\C6H10\CYL509\19-Jun-2008\0\#B3LYP\GEN 6  
D INT (GRID=ULTRAFINE) OPT FREQ=NORAMAN MAXDISK=1342177280\#n.CH=CHCH3.  
freq\0,1\C,-0.2583405636,-0.0866649406,-0.6745801852\C,0.470622017,-0  
.5072262006,-1.7217929567\H,-1.3141256156,0.1468294138,-0.8247857663\H  
,1.5255849822,-0.7386350514,-1.5635238126\C,-0.0464495549,-0.690818412  
,-3.1173538105\H,0.501095033,-0.0614329106,-3.8328215151\H,-1.10977422  
89,-0.4377833979,-3.189551988\H,0.0788800871,-1.7284644524,-3.45707155  
04\C,0.2583405636,0.0866649406,0.6745801852\C,-0.470622017,0.507226200  
6,1.7217929567\H,1.3141256156,-0.1468294138,0.8247857663\H,-1.52558498  
22,0.7386350514,1.5635238126\C,0.0464495549,0.690818412,3.1173538105\H  
,-0.501095033,0.0614329106,3.8328215151\H,1.1097742289,0.4377833979,3.  
189551988\H,-0.0788800871,1.7284644524,3.4570715504\Version=IA32L-G03  
RevC.02\State=1-AG\HF=-234.6320327\RMSD=3.768e-09\RMSF=2.588e-05\Dipol  
e=0.,0.,0.\PG=CI [X(C6H10)]\@

n.CHO-CHO

1\1\GINC-LC111\FOpt\RB3LYP\Gen\C2H2O2\CYL509\19-Jun-2008\0\#B3LYP\GEN  
6D INT (GRID=ULTRAFINE) OPT FREQ=NORAMAN MAXDISK=1342177280\#n.CHO.fre

q\0,1\C,-0.2305831334,-0.1708979771,-0.7064653149\O,0.5603359091,-0.3428220664,-1.6054264531\H,-1.3304437896,-0.2452315851,-0.8293970674\C,0.2305831334,0.1708979771,0.7064653149\O,-0.5603359091,0.3428220664,1.6054264531\H,1.3304437896,0.2452315851,0.8293970674\Version=IA32L-G03RevC.02\State=1-AG\HF=-227.8186306\RMSD=5.542e-09\RMSF=1.013e-04\Dipole=0.,0.,0.\PG=CI [X(C2H2O2)]\@

n.CN-CN

1\1\GINC-LC61\FOpt\RB3LYP\Gen\C2N2\CYL509\19-Jun-2008\0\#B3LYP\GEN 6D INT (GRID=ULTRAFINE) OPT FREQ=NORAMAN MAXDISK=1342177280\n.CN.freq\0,1\C,-0.2337396847,-0.117801629,-0.6388504595\N,-0.6277488869,-0.3163769198,-1.7157448697\C,0.2337396847,0.117801629,0.6388504595\N,0.6277488869,0.3163769198,1.7157448697\Version=IA32L-G03RevC.02\State=1-SGG\HF=-185.6546121\RMSD=3.376e-09\RMSF=4.767e-05\Dipole=0.,0.,0.\PG=D\*H [C\*(N1C1.C1N1)]\@

n.COCH3-COCH3

1\1\GINC-LC83\FOpt\RB3LYP\Gen\C4H6O2\CYL509\19-Jun-2008\0\#B3LYP\GEN 6D INT (GRID=ULTRAFINE) OPT FREQ=NORAMAN MAXDISK=1342177280\n.COCH3.freq\0,1\C,-0.0373353615,0.0100344105,0.7737647625\C,1.2590881969,0.2568004917,1.5053322766\O,-1.1081594376,-0.1689257995,1.3219407267\H,1.6893253635,1.2170058258,1.1988797968\H,1.0807888842,0.24832422,2.5818189367\H,1.9965923974,-0.5078354465,1.2361948984\C,0.0373353615,-0.0100344105,-0.7737647625\C,-1.2590881969,-0.2568004917,-1.5053322766\O,1.1081594376,0.1689257995,-1.3219407267\H,-1.6893253635,-1.2170058258,-1.1988797968\H,-1.0807888842,-0.24832422,-2.5818189367\H,-1.9965923974,0.5078354465,-1.2361948984\Version=IA32L-G03RevC.02\State=1-AG\HF=-306.4760225\RMSD=3.168e-09\RMSF=9.680e-05\Dipole=0.,0.,0.\PG=CI [X(C4H6O2)]\@

n.CON\_CH2CH3\_2-CON\_CH2CH3\_2

1\1\GINC-AC23\FOpt\RB3LYP\Gen\C10H20N2O2\CYL509\21-Aug-2008\0\#B3LYP\GEN 6D INT (GRID=ULTRAFINE) OPT FREQ=NORAMAN MAXDISK=1342177280\n.CON\_CH2CH3\_2.freq\0,1\C,0.9310585923,0.0214690106,0.1180272761\O,1.8235132603,0.2756748593,-0.6941666478\N,1.0619493675,-0.92383335,1.0879330564\C,0.0325308871,-1.2605785516,2.0803706913\C,2.3367249862,-1.6521881608,1.1518294826\H,0.5511179693,-1.4827837158,3.020339985\C,-0.8361426584,-2.4517839335,1.6635811487\H,-0.5777152121,-0.3758402767,2.2575341331\H,2.705871659,-1.7704430256,0.1305843818\H,2.1262726273,-2.6489609467,1.5543470387\C,3.3848648964,-0.9332913483,2.0050388277\H,-1.401907863,-2.2218081237,0.7539218565\H,-1.5527137682,-2.6936769552,2.4570103631\H,-0.2325472891,-3.3459626643,1.4701642408\H,3.6174083615,0.042898526,1.5703272643\O,4.3085077028,-1.5222218404,2.0472297259\H,3.0314704321,-0.7816095201,3.0313172399\C,-0.3597780462,0.8660781341,0.0978741389\O,-0.6806247984,1.5191883631,1.0930818799\N,-1.041592565,0.9237147321,-1.0782644453\C,-0.7186019056,0.1433646617,-2.2789771455\C,-2.1949983175,1.8312628655,-1.1465141619\H,-1.6677401824,-0.2167458547,-2.6962064387\C,0.0653033506,0.9361171273,-3.327326679\H,-0.1482515458,-0.7391830269,-1.9836825376\H,-1.965265501,2.7074231664,-0.5364965996\H,-2.2952965767,2.1595457804,-2.1861891038\C,-3.4923586703,1.1802954977,-0.6593623334\H,1.0305248544,1.2342841326,-2.9121788798\H,0.2370445758,0.3154798552,-4.2145801507\H,-0.4791705977,1.8322174822,-3.6461708592\H,-3.4014632652,0.9011460273,0.3943254331\H,-4.3291854533,1.8813254,-0.7578505962\H,-3.7341849279,0.2823683086,-1.2399961034\Version=IA64L-G03RevC.02\State=1-A\HF=-653.0909253\RMSD=5.776e-09\RMSF=3.697e-06\Dipole=-0.6723281,-1.0988535,-0.2089039\PG=C01 [X(C10H20N2O2)]\@

n.CON\_CH3\_2-CON\_CH3\_2

1\1\GINC-AC25\FOpt\RB3LYP\Gen\C6H12N2O2\CYL509\21-Aug-2008\0\#B3LYP\GEN 6D INT (GRID=ULTRAFINE) OPT FREQ=NORAMAN MAXDISK=1342177280\n.CON\_CH3\_2.freq\0,1\H,-1.8820911491,2.6170274372,-1.9720831936\C,-2.1430447906,1.6951909856,-1.4360473304\N,-1.07595571,1.3272525209,-0.5150992765\H,-2.2810814972,0.8850095048,-2.1506899686\H,-3.0765921977,1.8673912589,-0.8855842193\C,-0.4176821421,0.1505963536,-0.7169572371\O,-0.7063426219,-0.6467865524,-1.6091406644\C,-0.7799409458,2.3013129412,0.526185293\H,-0.4378300692,3.2434396695,0.0789414591\H,0.003541759,1.9402714676,1.1872509192\H,-1.6881430492,2.5055906138,1.108025264\H,1.8883212345,-1.9403722844,2.5304749404\C,2.1088493458,-1.6973101964,1.4833427791\N,0.8839895939,-1.3392286545,0.7806822873\H,2.7957568453,-0.8533507952,1.4380947167\H,2.5737162866,-2.5745493752,1.0147859959\C,0.8177562668,-0.1254362274,0.1634493794\O,1.7202776496,0.7104620485,0.2063316466\C,-0.1544401743,-2.3600910601,0.7665712436\H,-0.4106238566,-2.6386358353,1.7970352899\H,-1.0438921526,-2.0052533696,0.2525985982\H,0.2022150774,-3.2577161053,0.2452764988\Version=IA64L-G03RevC.02\State=1-A\HF=-495.8266781\RMSD=5.936e-09\RMSF=7.102e-06\Dipole=-0.7428886,-0.046756,1.0278868\PG=C01 [X(C6H12N2O2)]\@

n.CONH2-CONH2

```
1\1\GINC-LC61\FOpt\RB3LYP\Gen\C2H4N2O2\CYL509\19-Jun-2008\0\#B3LYP/GE
N 6D INT (GRID=ULTRAFINE) OPT FREQ=NORAMAN MAXDISK=1342177280\n.CONH2.
freq\0,1\C,-0.0310487488,0.0046131236,0.7727642591\N,1.1701113417,0.2
868584087,1.3154515219\O,-1.0712282221,-0.2233256796,1.3800226434\H,1.
2796702022,0.3265880208,2.3176292426\H,1.9506480197,0.4552263262,0.694
5738108\C,0.0310487488,-0.0046131236,-0.7727642591\N,-1.1701113417,-0.
2868584087,-1.3154515219\O,1.0712282221,0.2233256796,-1.3800226434\H,-
1.2796702022,-0.3265880208,-2.3176292426\H,-1.9506480197,-0.4552263262
,-0.6945738108\Version=IA32L-G03RevC.02\State=1-AG\HF=-338.6012987\RM
SD=3.501e-09\RMSF=3.448e-05\Dipole=0.,0.,0.\PG=CI [X(C2H4N2O2)]\@
```

n.CONHCH3-CONHCH3

```
1\1\GINC-LC128\FOpt\RB3LYP\Gen\C4H8N2O2\CYL509\19-Jun-2008\0\#B3LYP/G
EN 6D INT (GRID=ULTRAFINE) OPT FREQ=NORAMAN MAXDISK=1342177280\n.CONHCH
H3.freq\0,1\C,0.3173422784,-0.5732997806,-0.4083647121\O,1.4841926959
,-0.5242439564,-0.7951504304\N,-0.5579466,-1.575437779,-0.6173596905\H
,-1.4779814179,-1.4284443668,-0.2165638818\C,-0.2366991571,-2.78068244
49,-1.3539287274\H,0.8018428655,-2.7034585696,-1.6803846083\H,-0.88274
08231,-2.8883973022,-2.2328932136\H,-0.3498655699,-3.6694428829,-0.722
3880889\C,-0.3173422784,0.5732997806,0.4083647121\O,-1.4841926959,0.52
42439564,0.7951504304\N,0.5579466,1.575437779,0.6173596905\H,1.4779814
179,-1.4284443668,0.2165638818\C,0.2366991571,2.7806824449,1.3539287274
\H,-0.8018428655,2.7034585696,1.6803846083\H,0.8827408231,2.8883973022
,2.2328932136\H,0.3498655699,3.6694428829,0.7223880889\Version=IA32L-
G03RevC.02\State=1-AG\HF=-417.2264496\RMSD=5.946e-09\RMSF=8.987e-05\Di
pole=0.,0.,0.\PG=CI [X(C4H8N2O2)]\@
```

n.COOC\_CH3\_3-COOC\_CH3\_3

```
1\1\GINC-AC25\FOpt\RB3LYP\Gen\C10H18O4\CYL509\21-Aug-2008\0\#B3LYP/GE
N 6D INT (GRID=ULTRAFINE) OPT FREQ=NORAMAN MAXDISK=1342177280\n.COOC_C
H3_3.freq\0,1\C,0.7347958534,-0.1447771873,-0.2655378792\O,1.34430610
29,0.5594074762,-1.0386575614\O,1.2109414903,-1.1342384148,0.489102286
\C,2.6395620213,-1.5233689846,0.4491485477\C,3.0023058719,-2.003632008
2,-0.9592573466\C,2.6944359198,-2.6757992144,1.4535171117\C,3.50872389
74,-0.3493084145,0.9100870613\H,3.7153423576,-3.0664776486,1.519596500
6\H,2.0288484668,-3.4881134132,1.1455861302\H,2.3863477901,-2.33716503
46,2.4477379733\H,4.0220979023,-2.4044317349,-0.954354096\H,2.95186798
73,-1.1885571618,-1.6832212071\H,2.3244003392,-2.8036287967,-1.2755215
263\H,4.5498444692,-0.6801570243,0.9950337102\H,3.1835290506,0.00267849
71,1.8950906049\H,3.463114205,0.4814055562,0.2038628958\C,-0.793492078
4,-0.0235067442,-0.0348422896\O,-1.4780166303,-0.9427574077,0.35438412
68\O,-1.184842559,1.2090635412,-0.3555372729\C,-2.6073347335,1.6157649
078,-0.2842233833\C,-3.1040504041,1.5095327768,1.160876391\C,-2.555414
2563,3.0743748701,-0.7420705209\C,-3.4344613547,0.7646191908,-1.252342
8208\H,-3.5628223509,3.5037535339,-0.7390738276\H,-1.9225110096,3.6670
014343,-0.0740183154\H,-2.1479693227,3.1465783647,-1.7552130522\H,-4.1
153886415,1.9257693907,1.2283398475\H,-3.1306311443,0.4718522157,1.497
6714663\H,-2.4555083477,2.0845966991,1.8306324265\H,-4.4601399129,1.14
85417374,-1.2873745782\H,-3.0158077885,0.8213229565,-2.2628316462\H,-3
.4641459253,-0.2801662857,-0.9384051611\Version=IA64L-G03RevC.02\Stat
e=1-A\HF=-692.8321244\RMSD=4.184e-09\RMSF=6.920e-07\Dipole=0.049101,0.
1407737,0.2512811\PG=C01 [X(C10H18O4)]\@
```

n.COOCH2CH3-COOCH2CH3

```
1\1\GINC-LC95\FOpt\RB3LYP\Gen\C6H10O4\CYL509\19-Jun-2008\0\#B3LYP/GEN
6D INT (GRID=ULTRAFINE) OPT FREQ=NORAMAN MAXDISK=1342177280\n.COOCH2C
H3.freq\0,1\C,0.7256234723,-0.2549472433,-0.0626047277\O,1.3932371116
,-0.1704616071,-1.0665717509\O,1.1174988713,-0.7942988467,1.0954428853
\C,2.4698167187,-1.3161240805,1.1173470261\H,3.1596571082,-0.503407351
3,0.8681191686\H,2.5602147188,-2.0791320148,0.3375010131\C,2.717111226
6,-1.8771109951,2.5038929968\H,3.7328582859,-2.2831042975,2.5617785215
\H,2.0096930804,-2.6802434834,2.7323088405\H,2.6117753086,-1.097938275
7,3.2650958386\C,-0.7256234723,0.2549472433,0.0626047277\O,-1.39323711
16,0.1704616071,1.0665717509\O,-1.1174988713,0.7942988467,-1.095442885
3\C,-2.4698167187,1.3161240805,-1.1173470261\H,-3.1596571082,0.5034073
513,-0.8681191686\H,-2.5602147188,2.0791320148,-0.3375010131\C,-2.7171
112266,1.8771109951,-2.5038929968\H,-3.7328582859,2.2831042975,-2.5617
785215\H,-2.0096930804,2.6802434834,-2.7323088405\H,-2.6117753086,1.09
79382757,-3.2650958386\Version=IA32L-G03RevC.02\State=1-AG\HF=-535.56
81905\RMSD=7.000e-09\RMSF=7.284e-05\Dipole=0.,0.,0.\PG=CI [X(C6H10O4)]
\@
```

n.COOCH3-COOCH3

```
1\1\GINC-LC61\FOpt\RB3LYP\Gen\C4H6O4\CYL509\19-Jun-2008\0\#B3LYP/GEN
6D INT (GRID=ULTRAFINE) OPT FREQ=NORAMAN MAXDISK=1342177280\n.COOCH3.f
req\0,1\C,0.4200229747,-0.63425011,-0.124402361\O,1.6148191611,-0.639
```

7662476,-0.3016605316\O,-0.3730016564,-1.7108840954,-0.1128424472\C,0.2990145883,-2.9637449831,-0.3353084237\H,0.790031998,-2.9636328138,-1.3119657336\H,-0.4821244967,-3.722265197,-0.294783599\H,1.0485961923,-3.1362725693,0.4414343404\C,-0.4200229747,0.63425011,0.124402361\O,-1.6148191611,0.6397662476,0.3016605316\O,0.3730016564,1.7108840954,0.1128424472\C,-0.2990145883,2.9637449831,0.3353084237\H,-0.790031998,2.9636328138,1.3119657336\H,0.4821244967,3.722265197,0.294783599\H,-1.0485961923,3.1362725693,-0.4414343404\\Version=IA32L-G03RevC.02\State=1-AG\HF=-456.9295614\RMSD=9.453e-09\RMSF=2.991e-05\Dipole=0.,0.,0.\PG=CI [X(C4H6O4)]\@

n.COOH-COOH

1\1\GINC-LC86\FOpt\RB3LYP\Gen\C2H2O4\CYL509\19-Jun-2008\0\#B3LYP/GEN 6D INT (GRID=ULTRAFINE) OPT FREQ=NORAMAN MAXDISK=1342177280\\n.COOH.freq\0,1\C,-0.0090939132,0.0252491585,0.7686928745\O,0.9598780859,0.2249606681,1.4576672978\O,-1.2545758665,-0.1843456322,1.22338752\H,-1.2011786115,-0.1405219784,2.1968870615\C,0.0090939132,-0.0252491585,-0.7686928745\O,-0.9598780859,-0.2249606681,-1.4576672978\O,1.2545758665,0.1843456322,-1.22338752\H,1.2011786115,0.1405219784,-2.1968870615\\Version=IA32L-G03RevC.02\State=1-AG\HF=-378.3134401\RMSD=5.842e-09\RMSF=1.292e-04\Dipole=0.,0.,0.\PG=CI [X(C2H2O4)]\@

n.COPh-COPh

1\1\GINC-AC24\FOpt\RB3LYP\Gen\C14H10O2\CYL509\21-Aug-2008\0\#B3LYP/GEN 6D INT (GRID=ULTRAFINE) OPT FREQ=NORAMAN MAXDISK=1342177280\\n.COPh.freq\0,1\C,-4.2485703452,-0.548973554,0.2111137101\C,-4.2782797936,-0.1976928713,1.5648423562\C,-3.0856302178,-0.0290307366,2.2709083375\C,-1.860300962,-0.2109234488,1.6315584177\C,-1.8233500599,-0.5629372384,0.2720811728\C,-3.0290668791,-0.7283317703,-0.4315428416\C,-0.5566360467,-0.7323257243,-0.4902941205\O,-0.5386382936,-1.0167409306,-1.680959506\H,-2.9807135366,-0.9971941907,-1.4817922378\H,-0.9384289074,-0.0965875622,2.1890734377\H,-3.1090670033,0.2404666847,3.3230365998\H,-5.1766621055,-0.6803332368,-0.3383173403\H,-5.2312118084,-0.0560403089,2.0679325205\C,4.1713207043,0.9904268996,-0.1312828915\C,4.0018315705,1.7723617644,-1.2787542697\C,2.7799983843,1.7689042633,-1.9544284781\C,1.7241299352,0.9859373351,-1.490345191\C,1.8873306041,0.1990817135,-0.3380537104\C,3.1202515932,0.2106019088,0.3371991886\C,0.7955735855,-0.6284155435,0.2428704459\O,0.9435026266,-1.2913148517,1.2615799907\H,3.2265805343,-0.4011250441,1.2272141081\H,0.7843159288,0.9730773727,-2.0291682774\H,2.6498139144,2.3736865889,-2.8474182915\H,5.1222170384,0.9930227045,0.3943377488\H,4.822628845,2.3833752652,-1.6450949016\\Version=IA64L-G03RevC.02\State=1-A\HF=-689.9529555\RMSD=6.911e-09\RMSF=2.596e-05\Dipole=-0.1857453,1.0622678,0.1927348\PG=C01 [X(C14H10O2)]\@
